# Supplementary material
Source: publisher figshare collection journal article supplement (https://frontiersin.figshare.com/ndownloader/files/28376139)
Supplement: Supplementary file 1 [file 28376139]

## Sheet: raw_data
Transect ID	Mesh Size (µm)	Type (Particle/Fibre)	Colour	MFD (µm)	FTIR Analysis	Polymer	Corresponding Contamination Filter
1	100	Particle	red	250	y	Chitin	A
1	100	Fibre	blue	900	y	UI	A
1	100	Fibre	black	450	y	UI	A
1	100	Particle	red	200	y	Chitin	A
1	100	Particle	black	250	y	Lithic	A
1	100	Particle	white	200	y	Chitin	A
1	100	Fibre	blue	300	y	UI Polymer	A
1	100	Fibre	blue	100	y	UI	A
1	100	Fibre	black		n	UI	A
1	100	Fibre	black		n	UI	A
1	100	Fibre	black		n	UI	A
1	100	Fibre	black		n	UI	A
1	50	Fibre	red	120	y	Polyethylene	D
1	50	Particle	black	130	y	Ship Metal	D
1	50	Particle	red	80	y	Chitin	D
1	50	Fibre	black	250	y	UI	D
1	50	Particle	grey	200	y	Chitin	D
1	50	Particle	red	100	y	Chitin	D
1	50	Particle	red	60	y	Chitin	D
2	300	Fibre	black	1100	y	Cellulosic	B
2	300	Particle	black	900	y	Ship Metal	B
2	100	Fibre	black	1000	y	Polyester	D
2	100	Fibre	black	300	y	UI	D
2	100	Fibre	red	650	y	UI	D
2	100	Fibre	black	450	y	Cellulosic	D
2	100	Fibre	blue	750	y	Cellulosic	D
2	100	Fibre	blue	700	y	Cellulosic	D
2	50	Fibre	black	150	y	Polyester	D
2	100	Fibre	black		n	UI	D
2	100	Fibre	black		n	UI	D
2	100	Fibre	black		n	UI	D
2	100	Fibre	black		n	UI	D
2	100	Fibre	black		n	UI	D
2	100	Fibre	black		n	UI	D
2	100	Fibre	black		n	UI	D
2	50	Particle	silver	300	y	Chitin	D
3	100	Fibre	blue	4000	y	Polyester	D
2	50	Particle	silver	250	y	Ship Metal	D
2	50	Particle	black	150	y	Ship Metal	D
2	50	Fibre	black		n	UI	D
2	50	Fibre	black		n	UI	D
2	50	Fibre	black		n	UI	D
2	50	Fibre	black		n	UI	D
2	50	Fibre	black		n	UI	D
2	50	Fibre	black		n	UI	D
2	50	Fibre	black		n	UI	D
2	50	Fibre	black		n	UI	D
2	50	Fibre	black		n	UI	D
2	50	Fibre	black		n	UI	D
2	50	Fibre	black		n	UI	D
2	50	Fibre	black		n	UI	D
2	50	Fibre	black		n	UI	D
2	50	Fibre	black		n	UI	D
2	50	Fibre	black		n	UI	D
2	50	Fibre	black		n	UI	D
2	50	Fibre	black		n	UI	D
2	50	Fibre	black		n	UI	D
2	50	Fibre	black		n	UI	D
2	50	Fibre	black		n	UI	D
2	50	Fibre	blue		n	UI	D
2	50	Fibre	blue		n	UI	D
2	50	Fibre	blue		n	UI	D
2	50	Fibre	blue		n	UI	D
2	50	Fibre	red		n	UI	D
3	300	Fibre	blue	1000	y	Cellulosic	D
3	300	Fibre	grey	550	y	Cellulosic	D
3	300	Particle	silver	450	y	Ship Metal	D
3	300	Fibre	black	1200	y	Cellulosic	D
3	100	Fibre	black	3500	y	Polyester	D
3	50	Fibre	black	500	y	Polyamide	D
3	100	Fibre	blue		n	UI	D
3	100	Fibre	blue		n	UI	D
3	100	Fibre	blue		n	UI	D
3	100	Fibre	blue		n	UI	D
3	100	Fibre	blue		n	UI	D
3	100	Fibre	blue		n	UI	D
3	100	Fibre	blue		n	UI	D
3	100	Fibre	blue		n	UI	D
3	100	Fibre	black		n	UI	D
3	100	Fibre	black		n	UI	D
3	100	Fibre	black		n	UI	D
3	100	Fibre	black		n	UI	D
3	100	Fibre	black		n	UI	D
3	100	Fibre	black		n	UI	D
3	100	Fibre	black		n	UI	D
3	100	Fibre	black		n	UI	D
3	100	Fibre	black		n	UI	D
3	100	Fibre	black		n	UI	D
3	50	Fibre	black	250	y	Polyester	D
3	50	Fibre	black	1750	y	Cellulosic	D
3	50	Fibre	blue	1600	y	UI	D
3	50	Fibre	black	400	y	Cellulosic	D
3	50	Fibre	white	1800	y	UI	D
3	50	Fibre	blue	600	y	Cellulosic	D
3	50	Fibre	blue	900	y	Polyester	D
3	50	Fibre	blue	1400	y	Polyester	D
5	50	Fibre	black	200	y	Polyester	D
3	50	Fibre	black		n	UI	D
3	50	Fibre	black		n	UI	D
3	50	Fibre	black		n	UI	D
3	50	Fibre	black		n	UI	D
3	50	Fibre	black		n	UI	D
3	50	Fibre	black		n	UI	D
3	50	Fibre	black		n	UI	D
3	50	Fibre	black		n	UI	D
3	50	Fibre	red		n	UI	D
3	50	Fibre	red		n	UI	D
4	300	Fibre	black	600	y	Cellulosic	E
7	100	Fibre	blue	200	y	Polyester	B
8	100	Fibre	blue	900	y	acrylic	B
4	100	Particle	black	400	y	UI	B
4	100	Fibre	blue	2000	y	Cellulosic	B
4	100	Fibre	blue	3000	y	Cellulosic	B
4	100	Fibre	black	500	y	Cellulosic	B
4	100	Particle	silver		n	Chitin	B
4	100	Fibre	black		n	UI	B
4	100	Fibre	black		n	UI	B
4	100	Fibre	black		n	UI	B
4	100	Fibre	red		n	UI	B
4	50	Fibre	black	3000	y	UI	D
4	50	Fibre	blue	250	y	UI	D
4	50	Fibre	red	550	y	UI	D
4	50	Fibre	black	600	y	UI	D
4	50	Fibre	black		n	UI	D
4	50	Fibre	black		n	UI	D
4	50	Fibre	black		n	UI	D
4	50	Fibre	black		n	UI	D
4	50	Fibre	black		n	UI	D
4	50	Fibre	black		n	UI	D
4	50	Fibre	black		n	UI	D
4	50	Fibre	black		n	UI	D
4	50	Fibre	black		n	UI	D
4	50	Fibre	black		n	UI	D
4	50	Fibre	black		n	UI	D
4	50	Fibre	black		n	UI	D
5	300	Particle	white	1500	y	Chitin	E
5	300	Particle	black	3000	y	Ship Metal	E
9	100	Fibre	blue	2000	y	Polyamide	B
5	50	Particle	silver	350	y	Metal	D
5	50	Particle	black	150	y	Metal	D
5	50	Particle	black		n	UI	D
5	50	Particle	red		n	UI	D
5	50	Fibre	blue		n	UI	D
5	50	Fibre	blue		n	UI	D
5	50	Fibre	blue		n	UI	D
5	50	Fibre	black		n	UI	D
5	50	Fibre	black		n	UI	D
5	50	Fibre	black		n	UI	D
5	50	Fibre	black		n	UI	D
5	50	Fibre	black		n	UI	D
5	50	Fibre	black		n	UI	D
5	50	Fibre	black		n	UI	D
5	50	Fibre	black		n	UI	D
5	50	Fibre	black		n	UI	D
5	50	Fibre	black		n	UI	D
5	50	Particle	black		n	UI	D
5	50	Particle	black		n	UI	D
5	50	Particle	black		n	UI	D
5	50	Particle	black		n	UI	D
5	50	Particle	black		n	UI	D
5	50	Particle	black		n	UI	D
5	50	Particle	black		n	UI	D
5	50	Particle	black		n	UI	D
5	50	Particle	black		n	UI	D
5	50	Particle	black		n	UI	D
5	50	Particle	green		n	UI	D
6	300	Fibre	blue	38000	y	Cellulosic	E
6	300	Particle	black	600	y	Metal	E
6	100	Fibre	blue	800	y	UI	B
6	100	Fibre	blue	1800	y	UI	B
6	100	Fibre	black	600	y	UI	B
6	100	Fibre	blue	1000	y	UI	B
6	100	Fibre	blue		n	UI	B
6	100	Fibre	blue		n	UI	B
6	100	Fibre	blue		n	UI	B
6	100	Fibre	blue		n	UI	B
6	100	Fibre	blue		n	UI	B
6	100	Fibre	blue		n	UI	B
6	100	Fibre	black		n	UI	B
6	100	Fibre	black		n	UI	B
6	100	Fibre	black		n	UI	B
6	100	Fibre	black		n	UI	B
6	100	Fibre	black		n	UI	B
6	100	Fibre	black		n	UI	B
6	100	Fibre	black		n	UI	B
6	100	Fibre	black		n	UI	B
6	100	Fibre	black		n	UI	B
6	100	Fibre	black		n	UI	B
6	100	Fibre	black		n	UI	B
6	100	Fibre	black		n	UI	B
6	100	Fibre	black		n	UI	B
6	50	Fibre	black	800	y	UI	D
6	50	Particle	black	160	y	UI	D
6	50	Fibre	black	600	y	UI	D
6	50	Fibre	black		n	UI	D
6	50	Fibre	black		n	UI	D
6	50	Fibre	black		n	UI	D
6	50	Fibre	black		n	UI	D
7	100	Fibre	blue	700	y	Cellulosic	B
7	100	Fibre	blue	200	y	Cellulosic	B
7	100	Fibre	blue	175	y	UI	B
9	100	Fibre	black	900	y	acrylic	B
7	100	Fibre	blue	350	y	Cellulosic	B
7	50	Fibre	blue	1200	y	Cellulosic	F
7	50	Fibre	blue	700	y	Cellulosic	F
11	100	Fibre	blue	900	y	acrylic	B
7	100	Fibre	black		n	UI	B
7	100	Fibre	black		n	UI	B
7	100	Fibre	black		n	UI	B
7	100	Fibre	black		n	UI	B
7	100	Fibre	black		n	UI	B
7	100	Fibre	red		n	UI	B
8	50	Fibre	black	1300	y	Cellulosic	F
8	50	Fibre	blue		n	UI	F
8	50	Fibre	black	1100	y	Cellulosic	F
8	100	Fibre	black	1000	y	Cellulosic	B
8	100	Fibre	red	1100	y	Cellulosic	B
8	100	Fibre	black	3500	y	Cellulosic	B
11	100	Fibre	blue	600	y	Polyamide	B
8	100	Fibre	blue	600	y	Cellulosic	B
8	100	Fibre	red		n	UI	B
8	100	Fibre	red	750	y	Cellulosic	B
8	100	Particle	black	250	y	UI	B
8	100	Particle	black		n	UI	B
8	100	Fibre	black		n	UI	B
8	100	Fibre	black		n	UI	B
8	100	Fibre	black		n	UI	B
8	100	Fibre	black		n	UI	B
8	100	Fibre	black		n	UI	B
8	100	Fibre	black		n	UI	B
8	100	Fibre	black		n	UI	B
8	100	Fibre	black		n	UI	B
8	100	Fibre	black		n	UI	B
8	100	Fibre	black		n	UI	B
8	100	Fibre	black		n	UI	B
8	100	Fibre	blue		n	UI	B
8	100	Fibre	blue		n	UI	B
8	100	Fibre	blue		n	UI	B
9	300	Particle	black	700	y	UI	B
9	300	Particle	red	800	y	Chitin	B
9	300	Particle	black	1000	y	Ship Metal	B
9	300	Particle	red	800	y	Chitin	B
9	300	Fibre	black	400	y	Cellulosic	B
11	100	Fibre	black	1700	y	Acrylic	B
9	100	Fibre	blue		n	UI	B
9	100	Fibre	blue		n	UI	B
9	100	Fibre	blue		n	UI	B
9	100	Fibre	black	1100	y	Cellulosic	B
9	100	Fibre	black	800	y	Cellulosic	B
9	100	Fibre	black	600	y	Cellulosic	B
9	100	Fibre	blue	900	y	Cellulosic	B
12	300	Fibre	black	650	y	Polyamide	E
12	100	Fibre	blue	450	y	Polyester	B
9	50	Fibre	black	300	y	Cellulosic	C
9	50	Particle	black	220	y	Ship Metal	C
10	300	Particle	red	2000	y	Ship Metal	B
10	300	Particle	red	900	y	Ship Metal	B
10	300	Particle	red	1200	y	Ship Metal	B
10	100	Fibre	blue	2250	y	Cellulosic	B
10	100	Fibre	blue	250	y	Cellulosic	B
10	100	Fibre	red	700	y	Cellulosic	B
10	100	Fibre	white	200	y	Cellulosic	B
10	100	Fibre	blue		n	UI	B
10	100	Fibre	blue		n	UI	B
10	100	Fibre	blue		n	UI	B
10	100	Fibre	blue		n	UI	B
10	100	Fibre	blue		n	UI	B
10	100	Fibre	blue		n	UI	B
10	100	Fibre	blue		n	UI	B
10	100	Fibre	blue		n	UI	B
10	100	Fibre	blue		n	UI	B
10	100	Fibre	blue		n	UI	B
10	100	Fibre	blue		n	UI	B
10	100	Fibre	blue		n	UI	B
10	100	Fibre	blue		n	UI	B
10	100	Fibre	blue		n	UI	B
10	100	Fibre	blue		n	UI	B
10	100	Fibre	blue		n	UI	B
10	100	Fibre	blue		n	UI	B
10	100	Fibre	black		n	UI	B
10	100	Fibre	black		n	UI	B
10	100	Fibre	black		n	UI	B
10	100	Fibre	black		n	UI	B
10	100	Fibre	black		n	UI	B
10	100	Fibre	black		n	UI	B
10	100	Fibre	black		n	UI	B
10	100	Fibre	black		n	UI	B
10	100	Fibre	black		n	UI	B
10	100	Fibre	black		n	UI	B
10	100	Fibre	black		n	UI	B
10	100	Fibre	red		n	UI	B
10	100	Fibre	red		n	UI	B
10	100	Fibre	red		n	UI	B
10	100	Fibre	red		n	UI	B
10	100	Fibre	red		n	UI	B
10	50	Fibre	blue	3000	y	Cellulosic	C
10	50	Fibre	black	650	y	Cellulosic	C
11	100	Fibre	blue	550	y	Cellulosic	B
12	100	Fibre	blue	600	y	Polyester	B
11	100	Particle	black	240	y	Lithic	B
12	50	Fibre	blue	750	y	Polyamide	C
11	100	Particle	white	1000	y	Chitin	B
11	100	Particle	white	980	y	Chitin	B
11	100	Fibre	blue	900	y	Cellulosic	B
13	50	Fibre	black	1600	y	Acrylic	C
16	100	Fibre	black	1800	y	Polyester	C
11	50	Fibre	blue	1200	y	Cellulosic	C
11	100	Fibre	blue		n	UI	B
11	100	Fibre	blue		n	UI	B
11	100	Fibre	blue		n	UI	B
11	100	Fibre	black		n	UI	B
11	100	Fibre	black		n	UI	B
11	100	Fibre	black		n	UI	B
11	100	Fibre	black		n	UI	B
11	100	Fibre	black		n	UI	B
11	100	Fibre	black		n	UI	B
11	100	Fibre	black		n	UI	B
11	100	Fibre	black		n	UI	B
11	100	Fibre	black		n	UI	B
11	100	Fibre	black		n	UI	B
11	100	Fibre	black		n	UI	B
11	100	Fibre	black		n	UI	B
11	100	Fibre	black		n	UI	B
11	100	Fibre	black		n	UI	B
11	100	Fibre	black		n	UI	B
11	100	Fibre	black		n	UI	B
11	100	Fibre	black		n	UI	B
11	100	Fibre	black		n	UI	B
11	100	Fibre	black		n	UI	B
11	100	Fibre	black		n	UI	B
11	100	Fibre	black		n	UI	B
11	100	Fibre	black		n	UI	B
11	100	Fibre	black		n	UI	B
11	100	Fibre	black		n	UI	B
11	100	Fibre	black		n	UI	B
11	100	Fibre	black		n	UI	B
11	100	Fibre	black		n	UI	B
11	100	Fibre	black		n	UI	B
11	100	Fibre	black		n	UI	B
11	100	Fibre	black		n	UI	B
11	100	Fibre	black		n	UI	B
11	50	Fibre	blue		n	UI	B
11	50	Fibre	red		n	UI	B
11	50	Fibre	black		n	UI	B
11	50	Fibre	black		n	UI	B
11	50	Fibre	black		n	UI	B
11	50	Fibre	black		n	UI	B
11	50	Fibre	black		n	UI	B
11	50	Fibre	black		n	UI	B
11	50	Fibre	black		n	UI	B
11	50	Fibre	black		n	UI	B
11	50	Fibre	black		n	UI	B
11	50	Fibre	black		n	UI	B
11	50	Fibre	black		n	UI	B
11	50	Fibre	black		n	UI	B
11	50	Fibre	black		n	UI	B
2	100	Particle	blue	80	y	UI Polymer	D
12	100	Fibre	black	700	y	Cellulosic	B
4	300	Particle	black	3000	y	Ethylene Copolymer	E
4	300	Particle	black	650	y	Ethylene/Propylene Copolymer	E
12	100	Fibre	black		n	UI	B
12	100	Fibre	black		n	UI	B
12	100	Fibre	black		n	UI	B
12	100	Fibre	black		n	UI	B
12	100	Fibre	black		n	UI	B
12	100	Fibre	black		n	UI	B
12	100	Fibre	black		n	UI	B
12	100	Fibre	black		n	UI	B
12	100	Fibre	black		n	UI	B
12	100	Fibre	black		n	UI	B
12	100	Fibre	black		n	UI	B
12	100	Fibre	black		n	UI	B
12	100	Fibre	black		n	UI	B
12	100	Fibre	black		n	UI	B
12	100	Fibre	black		n	UI	B
12	100	Fibre	black		n	UI	B
12	100	Fibre	black		n	UI	B
12	100	Fibre	black		n	UI	B
12	100	Fibre	black		n	UI	B
12	100	Fibre	black		n	UI	B
12	100	Fibre	black		n	UI	B
12	100	Fibre	black		n	UI	B
12	100	Fibre	black		n	UI	B
12	100	Fibre	red		n	UI	B
12	100	Particle	black		n	UI	B
12	100	Particle	black		n	UI	B
12	100	Particle	black		n	UI	B
12	100	Particle	black		n	UI	B
7	50	Particle	blue	250	y	Polyamide	F
12	50	Fibre	black	650	y	Cellulosic	C
12	50	Fibre	blue	1000	y	Cellulosic	C
12	50	Fibre	black	150	y	Cellulosic	C
12	50	Fibre	blue		n	UI	C
12	50	Fibre	blue		n	UI	C
12	50	Fibre	blue		n	UI	C
12	50	Fibre	blue		n	UI	C
12	50	Fibre	black		n	UI	C
12	50	Fibre	black		n	UI	C
12	50	Fibre	black		n	UI	C
12	50	Fibre	black		n	UI	C
13	100	Fibre	blue	1300	y	Cellulosic	C
13	100	Particle	black	100	y	No	C
13	100	Fibre	red		n	UI	C
13	100	Fibre	red		n	UI	C
13	100	Fibre	red		n	UI	C
13	100	Fibre	red		n	UI	C
13	100	Fibre	black		n	UI	C
13	100	Fibre	black		n	UI	C
13	100	Fibre	black		n	UI	C
13	100	Fibre	black		n	UI	C
13	100	Fibre	black		n	UI	C
13	100	Fibre	black		n	UI	C
13	100	Fibre	black		n	UI	C
13	100	Fibre	black		n	UI	C
13	100	Fibre	black		n	UI	C
13	100	Fibre	black		n	UI	C
13	100	Fibre	black		n	UI	C
13	100	Fibre	black		n	UI	C
13	100	Fibre	black		n	UI	C
13	100	Fibre	blue		n	UI	C
13	100	Particle	red		n	UI	C
13	100	Particle	red		n	UI	C
13	100	Particle	red		n	UI	C
13	100	Particle	red		n	UI	C
13	100	Particle	black		n	UI	C
13	100	Particle	black		n	UI	C
13	100	Particle	blue		n	UI	C
13	300	Particle	red	350	y	no	B
13	300	Fibre	black	500	y	Cellulosic	B
9	100	Particle	black	350	y	UI Polymer	B
13	50	Fibre	black	4500	y	Cellulosic	C
13	50	Fibre	black	11500	y	Cellulosic	C
13	50	Fibre	black		n	UI	C
14	300	Fibre	black	1100	y	Cellulosic	B
14	300	Fibre	black	700	y	Cellulosic	B
14	300	Particle	white	850	y	no	B
14	100	Fibre	black	350	y	Cellulosic	C
14	100	Fibre	black	1900	y	Cellulosic	C
14	50	Fibre	black		n	UI	C
14	50	Fibre	black		n	UI	C
14	50	Fibre	black		n	UI	C
14	50	Fibre	black		n	UI	C
14	50	Fibre	black		n	UI	C
14	50	Fibre	black		n	UI	C
14	50	Fibre	black		n	UI	C
14	50	Particle	black		n	UI	C
14	50	Particle	black		n	UI	C
14	50	Particle	black		n	UI	C
14	50	Particle	black		n	UI	C
14	50	Particle	black		n	UI	C
14	50	Particle	black		n	UI	C
14	50	Particle	black		n	UI	C
14	50	Particle	black		n	UI	C
14	50	Particle	black		n	UI	C
14	50	Particle	black		n	UI	C
14	50	Particle	black		n	UI	C
14	50	Particle	black		n	UI	C
14	50	Particle	black		n	UI	C
14	50	Particle	black		n	UI	C
15	300	Fibre	black	900	y	Cellulosic	A
15	300	Particle	black		n	UI	A
15	300	Particle	black		n	UI	A
15	100	Fibre	blue	800	y	Cellulosic	C
15	100	Fibre	black	1700	y	Cellulosic	C
15	100	Fibre	blue		n	UI	C
15	100	Fibre	black		n	UI	C
15	100	Fibre	black		n	UI	C
15	100	Fibre	black		n	UI	C
15	100	Fibre	black		n	UI	C
15	100	Fibre	black		n	UI	C
15	100	Fibre	black		n	UI	C
15	100	Fibre	black		n	UI	C
15	100	Fibre	black		n	UI	C
15	100	Fibre	black		n	UI	C
15	100	Fibre	black		n	UI	C
15	100	Fibre	black		n	UI	C
15	100	Fibre	black		n	UI	C
15	100	Fibre	black		n	UI	C
15	100	Fibre	black		n	UI	C
15	100	Fibre	black		n	UI	C
15	100	Particle	black		n	UI	C
15	100	Particle	black		n	UI	C
15	100	Particle	black		n	UI	C
15	100	Particle	black		n	UI	C
15	100	Particle	black		n	UI	C
15	100	Particle	black		n	UI	C
15	100	Particle	black		n	UI	C
15	100	Particle	black		n	UI	C
15	100	Particle	black		n	UI	C
15	100	Particle	black		n	UI	C
15	100	Particle	black		n	UI	C
15	100	Particle	black		n	UI	C
15	100	Particle	black		n	UI	C
15	100	Particle	black		n	UI	C
15	100	Particle	black		n	UI	C
15	100	Particle	red		n	Chitin	C
15	100	Particle	red		n	Chitin	C
15	100	Particle	red		n	Chitin	C
15	100	Particle	red		n	Chitin	C
11	300	Particle	blue	200	y	UI Polymer	B
16	100	Particle	red		n	UI	C
16	50	Fibre	black	1700	y	Cellulosic	D
16	50	Particle	black	280	y	Lithic	D
16	50	Fibre	red		n	UI	D
16	50	Fibre	black		n	UI	D
16	50	Fibre	black		n	UI	D
16	50	Fibre	black		n	UI	D
16	50	Fibre	black		n	UI	D
16	50	Fibre	black		n	UI	D
16	50	Fibre	black		n	UI	D
16	50	Fibre	black		n	UI	D
16	50	Fibre	black		n	UI	D
16	50	Fibre	black		n	UI	D
16	50	Fibre	black		n	UI	D
16	50	Fibre	black		n	UI	D
16	50	Fibre	black		n	UI	D
16	50	Fibre	black		n	UI	D
16	50	Particle	black		n	UI	D
16	50	Particle	black		n	UI	D
16	50	Particle	black		n	UI	D
16	50	Particle	black		n	UI	D
16	50	Particle	black		n	UI	D
16	50	Particle	black		n	UI	D
16	50	Particle	black		n	UI	D
16	50	Particle	black		n	UI	D
16	50	Particle	black		n	UI	D
16	50	Particle	black		n	UI	D
16	50	Particle	black		n	UI	D
16	50	Particle	black		n	UI	D
16	50	Particle	red		n	UI	D
16	50	Particle	red		n	UI	D
16	50	Particle	red		n	UI	D
16	50	Particle	red		n	UI	D
16	50	Particle	red		n	UI	D
16	50	Particle	red		n	UI	D
16	50	Particle	red		n	UI	D
16	50	Particle	red		n	UI	C
			,

## Sheet: plastic_concentration
	Normalized Concentrations: Particles & Fibres						Plastic Particle Concentration Calculation per Transect								Plastic Fibre Concentration Calculation per Transect
Transect ID	Volume sampled (L)	Contamination/L	Cellulosics/L	Plastic Particles/L	Plastic Fibres/L	Total Plastic/L	Total Count	Measured Count	Confirmed Plastic	Plastic Fraction	Estimated Plastic	Ship Contamination	Contamination Fraction	Estimated Contamination	Total Count	Air Contamination Factor	Prcodeural Blank	Corrected Count	Measured Fibre Count	Plastic Fibre Count	Plastic Fibre Fraction	Estimated Plastic Fibre Count	Cellulosics	Cellulosic Fibre Fraction	Estimated Cellulosics
1	311.733	0.00320787	0	0	0.00412426	0.00412426	9	9	0	0	0	1	0.111111	0	10	1.143	5	3.857	6	2	0.333333	1.28567	0	0	0
2	627.913	0.00477773	0.0272498	0.00159258	0.0136249	0.0152175	5	5	1	0.2	0	3	0.6	0	40	0.779	5	34.221	8	2	0.25	8.55525	4	0.5	17.1105
3	252.871	0.00395459	0.0520551	0	0.0624661	0.0624661	1	1	0	0	0	1	1	0	42	0.143	5	36.857	14	6	0.428571	15.7959	5	0.357143	13.1632
4	1163.49	0.00114598	0.00768724	0.00229196	0	0.00229196	4	3	2	0.666667	0.666667	1	0.333333	0.333333	24	1.112	5	17.888	8	0	0	0	4	0.5	8.944
5	634.6	0.0200914	0	0	0.0139568	0.0139568	17	4	0	0	0	3	0.75	9.75	14	0.143	5	8.857	1	1	1	8.857	0	0	0
6	890.333	0.00112318	0.00383292	0	0	0	2	2	0	0	0	1	0.5	0	30	1.112	5	23.888	7	0	0	0	1	0.142857	3.41257
7	311.483	0	0.0145938	0.00321045	0.00291876	0.0061292	1	1	1	1	0	0	0	0	13	1.636	5	6.364	7	1	0.142857	0.909143	5	0.714286	4.54571
8	320.367	0	0.0474253	0	0.00677504	0.00677504	2	1	0	0	0	0	0	0	24	1.636	5	17.364	8	1	0.125	2.1705	7	0.875	15.1935
9	289.221	0.00691513	0.01002	0.00345756	0.00334001	0.00679757	6	6	1	0.166667	0	2	0.333333	0	11	2.136	5	3.864	8	2	0.25	0.966	6	0.75	2.898
10	132.854	0.0225812	0.239842	0	0	0	3	3	0	0	0	3	1	0	39	2.136	5	31.864	6	0	0	0	6	1	31.864
11	88.363	0	0.270837	0.011317	0.270837	0.282154	4	4	1	0.25	0	0	0	0	55	2.136	5	47.864	6	3	0.5	23.932	3	0.5	23.932
12	468.771	-	0.0346982	-	0.0346982	0.0346982	4	0	0	-	-	0	-	-	40	2.469	5	32.531	8	4	0.5	16.2655	4	0.5	16.2655
13	196.933	0	0.0685065	0	0.0171266	0.0171266	9	2	0	0	0	0	0	0	24	2.136	5	16.864	5	1	0.2	3.3728	4	0.8	13.4912
14	155.325	0.0965717	0.0248769	0	0	0	15	1	0	0	0	1	1	14	11	2.136	5	3.864	4	0	0	0	4	1	3.864
15	45.808	-	0.251048	-	0	-	21	0	0	-	-	0	-	-	19	2.5	5	11.5	3	0	0	0	3	1	11.5
16	92.4	0	0.0506331	0	0.0506331	0.0506331	22	1	0	0	0	0	0	0	16	1.643	5	9.357	2	1	0.5	4.6785	1	0.5	4.6785
Total:	5982.46	0.160369	1.10331	0.0218695	0.480501	0.502371	125	43	6	2.28333	0.666667	16	5.62778	24.0833	412	24.996	80	307.004	101	24	4.22976	86.7882	57	9.13929	170.863

## Sheet: tsg_data
ddmmyyyy	hhmmss	datetime	lat_dd	long_dd	temp (DegC)	salinity	fluo(ug/L)	vel	ship_speed (knots)	flow_rate (L/min)	transect_corresponding
2018-08-16	13:53:00	2018-08-16 13:53:00	74.7286	-95.1231	-0.87	NaN	NaN	1439.17	NaN	1.07
2018-08-16	13:54:00	2018-08-16 13:54:00	74.7285	-95.1234	-0.9	NaN	NaN	1438.78	0.28	1.06
2018-08-16	13:55:00	2018-08-16 13:55:00	74.7285	-95.1236	-0.91	NaN	NaN	1438.51	0.23	1.07
2018-08-16	13:56:00	2018-08-16 13:56:00	74.7285	-95.1238	-0.92	NaN	NaN	1438.36	0.16	1.07
2018-08-16	13:57:00	2018-08-16 13:57:00	74.7284	-95.1239	-0.93	NaN	2.81	1438.21	0.11	1.06
2018-08-16	13:58:00	2018-08-16 13:58:00	74.7284	-95.1239	-0.92	30.16	2.82	1438.18	0.11	1.06
2018-08-16	13:59:00	2018-08-16 13:59:00	74.7284	-95.1238	-0.92	30.14	2.7	1438.21	0.13	1.07
2018-08-16	14:00:00	2018-08-16 14:00:00	74.7284	-95.1237	-0.91	30.13	2.71	1438.24	0.15	1.07
2018-08-16	14:01:00	2018-08-16 14:01:00	74.7283	-95.1237	-0.9	30.13	2.74	1438.26	0.13	1.06
2018-08-16	14:02:00	2018-08-16 14:02:00	74.7283	-95.1236	-0.89	30.13	2.77	1438.35	0.1	1.07
2018-08-16	14:03:00	2018-08-16 14:03:00	74.7283	-95.1235	-0.88	30.14	2.75	1438.38	0.11	1.06
2018-08-16	14:04:00	2018-08-16 14:04:00	74.7282	-95.1234	-0.88	30.15	2.82	1438.39	0.16	1.06
2018-08-16	14:05:00	2018-08-16 14:05:00	74.7282	-95.1233	-0.87	30.15	2.86	1438.42	0.2	1.07
2018-08-16	14:06:00	2018-08-16 14:06:00	74.7281	-95.1232	-0.88	30.15	2.92	1438.42	0.2	1.07
2018-08-16	14:07:00	2018-08-16 14:07:00	74.7281	-95.1231	-0.87	30.15	2.86	1438.42	0.18	1.07
2018-08-16	14:08:00	2018-08-16 14:08:00	74.7281	-95.123	-0.87	30.15	3	1438.41	0.13	1.06
2018-08-16	14:09:00	2018-08-16 14:09:00	74.728	-95.123	-0.87	30.15	2.88	1438.46	0.1	1.07
2018-08-16	14:10:00	2018-08-16 14:10:00	74.728	-95.1229	-0.86	30.16	2.93	1438.52	0.1	1.06
2018-08-16	14:11:00	2018-08-16 14:11:00	74.728	-95.123	-0.85	30.18	2.95	1438.55	0.1	1.06
2018-08-16	14:12:00	2018-08-16 14:12:00	74.728	-95.123	-0.85	30.19	2.86	1438.6	0.1	1.06
2018-08-16	14:13:00	2018-08-16 14:13:00	74.728	-95.1231	-0.84	30.2	2.84	1438.66	0.1	1.07
2018-08-16	14:14:00	2018-08-16 14:14:00	74.728	-95.1232	-0.83	30.21	2.71	1438.7	0.1	1.06
2018-08-16	14:15:00	2018-08-16 14:15:00	74.7279	-95.1233	-0.83	30.22	2.71	1438.72	0.1	1.06
2018-08-16	14:16:00	2018-08-16 14:16:00	74.7279	-95.1234	-0.82	30.23	2.75	1438.78	0.1	1.07
2018-08-16	14:17:00	2018-08-16 14:17:00	74.7279	-95.1236	-0.82	30.24	2.71	1438.82	0.1	1.07
2018-08-16	14:18:00	2018-08-16 14:18:00	74.7279	-95.1237	-0.82	30.25	2.73	1438.82	0.1	1.06
2018-08-16	14:19:00	2018-08-16 14:19:00	74.7279	-95.1239	-0.82	30.25	2.83	1438.81	0.1	1.06
2018-08-16	14:20:00	2018-08-16 14:20:00	74.7279	-95.124	-0.82	30.26	2.74	1438.82	0.1	1.07
2018-08-16	14:21:00	2018-08-16 14:21:00	74.7279	-95.1241	-0.82	30.26	2.58	1438.82	0.1	1.06
2018-08-16	14:22:00	2018-08-16 14:22:00	74.7279	-95.1242	-0.82	30.25	2.41	1438.79	0.07	1.06
2018-08-16	14:23:00	2018-08-16 14:23:00	74.7279	-95.1242	-0.82	30.24	2.37	1438.77	0.07	1.06
2018-08-16	14:24:00	2018-08-16 14:24:00	74.7279	-95.1242	-0.82	30.24	2.25	1438.8	0.1	1.07
2018-08-16	14:25:00	2018-08-16 14:25:00	74.7279	-95.1241	-0.81	30.24	2.06	1438.85	0.1	1.07
2018-08-16	14:26:00	2018-08-16 14:26:00	74.7278	-95.1241	-0.81	30.24	1.97	1438.86	0.1	1.06
2018-08-16	14:27:00	2018-08-16 14:27:00	74.7278	-95.124	-0.8	30.25	1.91	1438.91	0.07	1.06
2018-08-16	14:28:00	2018-08-16 14:28:00	74.7278	-95.124	-0.8	30.26	1.89	1438.96	0.05	1.06
2018-08-16	14:29:00	2018-08-16 14:29:00	74.7278	-95.124	-0.79	30.27	1.93	1438.98	0.05	1.06
2018-08-16	14:30:00	2018-08-16 14:30:00	74.7279	-95.1241	-0.79	30.27	1.97	1438.97	0.07	1.05
2018-08-16	14:31:00	2018-08-16 14:31:00	74.7279	-95.1241	-0.8	30.27	1.95	1438.95	0.1	1.06
2018-08-16	14:32:00	2018-08-16 14:32:00	74.7279	-95.1241	-0.81	30.26	1.92	1438.85	0.11	1.06
2018-08-16	14:33:00	2018-08-16 14:33:00	74.7279	-95.1242	-0.83	30.24	1.85	1438.77	0.11	1.07
2018-08-16	14:34:00	2018-08-16 14:34:00	74.728	-95.1242	-0.84	30.23	1.79	1438.68	0.1	1.06
2018-08-16	14:35:00	2018-08-16 14:35:00	74.728	-95.1241	-0.85	30.21	1.81	1438.6	0.1	1.07
2018-08-16	14:36:00	2018-08-16 14:36:00	74.728	-95.1241	-0.86	30.19	1.77	1438.51	0.14	1.06
2018-08-16	14:37:00	2018-08-16 14:37:00	74.728	-95.124	-0.86	30.18	1.75	1438.52	0.19	1.06
2018-08-16	14:38:00	2018-08-16 14:38:00	74.7281	-95.1239	-0.83	30.18	1.69	1438.69	0.2	1.06
2018-08-16	14:39:00	2018-08-16 14:39:00	74.7281	-95.1237	-0.79	30.23	1.66	1438.97	0.25	1.07
2018-08-16	14:40:00	2018-08-16 14:40:00	74.7282	-95.1236	-0.77	30.31	1.76	1439.17	0.3	1.06
2018-08-16	14:41:00	2018-08-16 14:41:00	74.7283	-95.1235	-0.77	30.33	1.82	1439.15	0.3	1.05
2018-08-16	14:42:00	2018-08-16 14:42:00	74.7284	-95.1235	-0.78	30.32	1.82	1439.09	0.28	1.05
2018-08-16	14:43:00	2018-08-16 14:43:00	74.7284	-95.1235	-0.79	30.3	1.82	1439.05	0.27	1.05
2018-08-16	14:44:00	2018-08-16 14:44:00	74.7285	-95.1235	-0.79	30.29	1.83	1439.02	0.24	1.05
2018-08-16	14:45:00	2018-08-16 14:45:00	74.7286	-95.1236	-0.79	30.28	1.76	1438.97	0.19	1.05
2018-08-16	14:46:00	2018-08-16 14:46:00	74.7286	-95.1236	-0.81	30.27	1.79	1438.9	0.14	1.05
2018-08-16	14:47:00	2018-08-16 14:47:00	74.7286	-95.1237	-0.8	30.25	1.88	1438.89	0.09	1.05
2018-08-16	14:48:00	2018-08-16 14:48:00	74.7287	-95.1238	-0.8	30.25	1.96	1438.9	0.07	1.05
2018-08-16	14:49:00	2018-08-16 14:49:00	74.7286	-95.1238	-0.78	30.25	2.11	1439	0.07	1.05
2018-08-16	14:50:00	2018-08-16 14:50:00	74.7286	-95.1238	-0.77	30.28	2.09	1439.11	0.08	1.06
2018-08-16	14:51:00	2018-08-16 14:51:00	74.7286	-95.1238	-0.76	30.3	2.21	1439.17	0.13	1.06
2018-08-16	14:52:00	2018-08-16 14:52:00	74.7285	-95.1238	-0.76	30.31	2.47	1439.15	0.17	1.06
2018-08-16	14:53:00	2018-08-16 14:53:00	74.7285	-95.1237	-0.76	30.32	2.51	1439.19	0.19	1.06
2018-08-16	14:54:00	2018-08-16 14:54:00	74.7284	-95.1236	-0.75	30.32	2.64	1439.2	0.15	1.06
2018-08-16	14:55:00	2018-08-16 14:55:00	74.7284	-95.1236	-0.76	30.32	2.64	1439.18	0.07	1.06
2018-08-16	14:56:00	2018-08-16 14:56:00	74.7284	-95.1235	-0.77	30.32	2.8	1439.11	0.07	1.05
2018-08-16	14:57:00	2018-08-16 14:57:00	74.7284	-95.1235	-0.78	30.3	2.82	1439.08	0.1	1.06
2018-08-16	14:58:00	2018-08-16 14:58:00	74.7285	-95.1235	-0.78	30.29	2.68	1439.03	0.1	1.06
2018-08-16	14:59:00	2018-08-16 14:59:00	74.7285	-95.1235	-0.79	30.29	2.65	1438.99	0.1	1.06
2018-08-16	15:00:00	2018-08-16 15:00:00	74.7285	-95.1235	-0.79	30.28	2.62	1438.99	0.1	1.06
2018-08-16	15:01:00	2018-08-16 15:01:00	74.7285	-95.1235	-0.78	30.28	2.67	1439.01	0.1	1.05
2018-08-16	15:02:00	2018-08-16 15:02:00	74.7286	-95.1235	-0.79	30.29	2.48	1439.03	0.1	1.06
2018-08-16	15:03:00	2018-08-16 15:03:00	74.7286	-95.1235	-0.79	30.29	2.42	1438.99	0.08	1.06
2018-08-16	15:04:00	2018-08-16 15:04:00	74.7286	-95.1235	-0.8	30.28	2.47	1438.95	0.04	1.05
2018-08-16	15:05:00	2018-08-16 15:05:00	74.7286	-95.1235	-0.8	30.27	2.53	1438.93	0.02	1.06
2018-08-16	15:06:00	2018-08-16 15:06:00	74.7286	-95.1235	-0.81	30.26	2.57	1438.91	0.06	1.06
2018-08-16	15:07:00	2018-08-16 15:07:00	74.7286	-95.1235	-0.8	30.26	2.57	1438.89	0.1	1.06
2018-08-16	15:08:00	2018-08-16 15:08:00	74.7287	-95.1235	-0.81	30.26	2.75	1438.86	0.1	1.06
2018-08-16	15:09:00	2018-08-16 15:09:00	74.7287	-95.1235	-0.82	30.26	2.65	1438.84	0.1	1.06
2018-08-16	15:10:00	2018-08-16 15:10:00	74.7287	-95.1235	-0.81	30.25	2.44	1438.84	0.1	1.06
2018-08-16	15:11:00	2018-08-16 15:11:00	74.7287	-95.1235	-0.81	30.25	2.37	1438.82	0.1	1.06
2018-08-16	15:12:00	2018-08-16 15:12:00	74.7288	-95.1235	-0.82	30.24	2.42	1438.81	0.1	1.06
2018-08-16	15:13:00	2018-08-16 15:13:00	74.7288	-95.1235	-0.82	30.23	2.41	1438.78	0.1	1.06
2018-08-16	15:14:00	2018-08-16 15:14:00	74.7288	-95.1236	-0.83	30.23	2.54	1438.74	0.1	1.05
2018-08-16	15:15:00	2018-08-16 15:15:00	74.7288	-95.1237	-0.83	30.23	2.57	1438.73	0.1	1.06
2018-08-16	15:16:00	2018-08-16 15:16:00	74.7288	-95.1238	-0.84	30.22	2.51	1438.68	0.1	1.06
2018-08-16	15:17:00	2018-08-16 15:17:00	74.7288	-95.1239	-0.85	30.21	2.52	1438.61	0.12	1.05
2018-08-16	15:18:00	2018-08-16 15:18:00	74.7289	-95.124	-0.85	30.2	2.57	1438.6	0.17	1.06
2018-08-16	15:19:00	2018-08-16 15:19:00	74.7289	-95.1242	-0.88	30.2	2.51	1438.5	0.2	1.06
2018-08-16	15:20:00	2018-08-16 15:20:00	74.7289	-95.1243	-0.88	30.17	2.37	1438.39	0.2	1.06
2018-08-16	15:21:00	2018-08-16 15:21:00	74.7289	-95.1245	-0.88	30.16	2.23	1438.37	0.18	1.04
2018-08-16	15:22:00	2018-08-16 15:22:00	74.7289	-95.1247	-0.89	30.15	2.23	1438.38	0.17	1.06
2018-08-16	15:23:00	2018-08-16 15:23:00	74.7289	-95.1249	-0.89	30.15	2.19	1438.34	0.2	1.06
2018-08-16	15:24:00	2018-08-16 15:24:00	74.7289	-95.125	-0.9	30.14	2.2	1438.29	0.15	1.06
2018-08-16	15:25:00	2018-08-16 15:25:00	74.7289	-95.1251	-0.89	30.13	2.34	1438.3	0.12	1.05
2018-08-16	15:26:00	2018-08-16 15:26:00	74.729	-95.1252	-0.89	30.14	2.35	1438.35	0.22	1.06
2018-08-16	15:27:00	2018-08-16 15:27:00	74.729	-95.1252	-0.89	30.14	2.29	1438.35	0.22	1.06
2018-08-16	15:28:00	2018-08-16 15:28:00	74.7291	-95.1252	-0.88	30.14	2.32	1438.36	0.15	1.05
2018-08-16	15:29:00	2018-08-16 15:29:00	74.7291	-95.1252	-0.87	30.15	2.38	1438.43	0.14	1.06
2018-08-16	15:30:00	2018-08-16 15:30:00	74.7292	-95.1252	-0.86	30.15	2.28	1438.48	0.09	1.06
2018-08-16	15:31:00	2018-08-16 15:31:00	74.7291	-95.1252	-0.86	30.16	2.41	1438.51	0.08	1.05
2018-08-16	15:32:00	2018-08-16 15:32:00	74.7291	-95.1253	-0.85	30.17	2.43	1438.55	0.16	1.06
2018-08-16	15:33:00	2018-08-16 15:33:00	74.7291	-95.1254	-0.86	30.18	2.39	1438.52	0.21	1.06
2018-08-16	15:34:00	2018-08-16 15:34:00	74.7291	-95.1257	-0.87	30.18	2.35	1438.45	0.21	1.06
2018-08-16	15:35:00	2018-08-16 15:35:00	74.7291	-95.1259	-0.88	30.16	2.39	1438.4	0.19	1.06
2018-08-16	15:36:00	2018-08-16 15:36:00	74.7291	-95.1261	-0.88	30.15	2.44	1438.37	0.16	1.06
2018-08-16	15:37:00	2018-08-16 15:37:00	74.729	-95.1262	-0.88	30.14	2.31	1438.37	0.13	1.06
2018-08-16	15:38:00	2018-08-16 15:38:00	74.729	-95.1263	-0.88	30.15	2.37	1438.38	0.13	1.06
2018-08-16	15:39:00	2018-08-16 15:39:00	74.729	-95.1263	-0.86	30.16	2.49	1438.47	0.12	1.06
2018-08-16	15:40:00	2018-08-16 15:40:00	74.7289	-95.1264	-0.85	30.18	2.51	1438.61	0.09	1.06
2018-08-16	15:41:00	2018-08-16 15:41:00	74.7289	-95.1264	-0.84	30.21	2.57	1438.65	0.04	1.06
2018-08-16	15:42:00	2018-08-16 15:42:00	74.7289	-95.1264	-0.83	30.23	2.67	1438.71	0	1.06
2018-08-16	15:43:00	2018-08-16 15:43:00	74.7289	-95.1264	-0.82	30.25	2.74	1438.78	0.03	1.06
2018-08-16	15:44:00	2018-08-16 15:44:00	74.7289	-95.1264	-0.81	30.27	2.74	1438.88	0.07	1.06
2018-08-16	15:45:00	2018-08-16 15:45:00	74.7289	-95.1265	-0.8	30.29	2.77	1438.92	0.09	1.06
2018-08-16	15:46:00	2018-08-16 15:46:00	74.7289	-95.1266	-0.8	30.3	2.74	1438.92	0.1	1.06
2018-08-16	15:47:00	2018-08-16 15:47:00	74.7289	-95.1267	-0.8	30.29	2.76	1438.9	0.1	1.05
2018-08-16	15:48:00	2018-08-16 15:48:00	74.729	-95.1267	-0.8	30.29	2.8	1438.92	0.13	1.06
2018-08-16	15:49:00	2018-08-16 15:49:00	74.729	-95.1267	-0.8	30.29	2.82	1438.98	0.17	1.06
2018-08-16	15:50:00	2018-08-16 15:50:00	74.729	-95.1268	-0.8	30.3	2.73	1438.97	0.17	1.06
2018-08-16	15:51:00	2018-08-16 15:51:00	74.7291	-95.1268	-0.8	30.3	2.77	1438.97	0.13	1.06
2018-08-16	15:52:00	2018-08-16 15:52:00	74.7291	-95.1267	-0.8	30.31	2.69	1439.02	0.1	1.06
2018-08-16	15:53:00	2018-08-16 15:53:00	74.7291	-95.1266	-0.79	30.35	2.57	1439.1	0.11	1.06
2018-08-16	15:54:00	2018-08-16 15:54:00	74.7291	-95.1265	-0.79	30.35	2.62	1439.07	0.16	1.06
2018-08-16	15:55:00	2018-08-16 15:55:00	74.7291	-95.1263	-0.8	30.34	2.38	1439.06	0.2	1.06
2018-08-16	15:56:00	2018-08-16 15:56:00	74.7291	-95.1261	-0.8	30.33	2.04	1439.03	0.2	1.07
2018-08-16	15:57:00	2018-08-16 15:57:00	74.7291	-95.1258	-0.8	30.32	1.92	1439.01	0.23	1.06
2018-08-16	15:58:00	2018-08-16 15:58:00	74.7291	-95.1256	-0.79	30.32	1.86	1439.03	0.23	1.07
2018-08-16	15:59:00	2018-08-16 15:59:00	74.7291	-95.1253	-0.79	30.32	1.73	1439.05	0.21	1.06
2018-08-16	16:00:00	2018-08-16 16:00:00	74.7292	-95.1252	-0.79	30.31	1.71	1439.02	0.2	1.06
2018-08-16	16:01:00	2018-08-16 16:01:00	74.7292	-95.1251	-0.8	30.3	1.89	1438.94	0.18	1.06
2018-08-16	16:02:00	2018-08-16 16:02:00	74.7292	-95.125	-0.81	30.28	1.8	1438.9	0.17	1.07
2018-08-16	16:03:00	2018-08-16 16:03:00	74.7293	-95.125	-0.8	30.27	1.92	1438.92	0.13	1.07
2018-08-16	16:04:00	2018-08-16 16:04:00	74.7293	-95.1249	-0.8	30.28	2	1438.95	0.15	1.06
2018-08-16	16:05:00	2018-08-16 16:05:00	74.7293	-95.1248	-0.8	30.28	2.17	1438.93	0.2	1.06
2018-08-16	16:06:00	2018-08-16 16:06:00	74.7294	-95.1247	-0.81	30.26	2.04	1438.87	0.2	1.07
2018-08-16	16:07:00	2018-08-16 16:07:00	74.7294	-95.1247	-0.82	30.24	1.91	1438.78	0.2	1.06
2018-08-16	16:08:00	2018-08-16 16:08:00	74.7295	-95.1246	-0.83	30.22	1.97	1438.69	0.19	1.06
2018-08-16	16:09:00	2018-08-16 16:09:00	74.7295	-95.1245	-0.84	30.21	1.89	1438.68	0.17	1.07
2018-08-16	16:10:00	2018-08-16 16:10:00	74.7296	-95.1245	-0.84	30.2	1.91	1438.68	0.17	1.06
2018-08-16	16:11:00	2018-08-16 16:11:00	74.7296	-95.1244	-0.84	30.2	2.1	1438.67	0.2	1.06
2018-08-16	16:12:00	2018-08-16 16:12:00	74.7296	-95.1244	-0.84	30.2	2.16	1438.67	0.2	1.06
2018-08-16	16:13:00	2018-08-16 16:13:00	74.7297	-95.1243	-0.84	30.2	2.22	1438.68	0.2	1.06
2018-08-16	16:14:00	2018-08-16 16:14:00	74.7297	-95.1243	-0.84	30.2	2.35	1438.64	0.2	1.06
2018-08-16	16:15:00	2018-08-16 16:15:00	74.7298	-95.1242	-0.84	30.2	2.46	1438.63	0.2	1.06
2018-08-16	16:16:00	2018-08-16 16:16:00	74.7298	-95.1242	-0.85	30.2	2.42	1438.63	0.2	1.06
2018-08-16	16:17:00	2018-08-16 16:17:00	74.7298	-95.1241	-0.85	30.2	2.46	1438.59	0.18	1.06
2018-08-16	16:18:00	2018-08-16 16:18:00	74.7299	-95.124	-0.85	30.19	2.54	1438.57	0.13	1.06
2018-08-16	16:19:00	2018-08-16 16:19:00	74.7299	-95.1239	-0.86	30.18	2.54	1438.54	0.12	1.06
2018-08-16	16:20:00	2018-08-16 16:20:00	74.7299	-95.1238	-0.86	30.17	2.5	1438.49	0.16	1.06
2018-08-16	16:21:00	2018-08-16 16:21:00	74.73	-95.1238	-0.87	30.16	2.37	1438.44	0.13	1.05
2018-08-16	16:22:00	2018-08-16 16:22:00	74.73	-95.1237	-0.86	30.15	2.25	1438.46	0.14	1.06
2018-08-16	16:23:00	2018-08-16 16:23:00	74.73	-95.1237	-0.87	30.15	2.24	1438.43	0.17	1.06
2018-08-16	16:24:00	2018-08-16 16:24:00	74.7301	-95.1237	-0.87	30.14	2.31	1438.41	0.16	1.06
2018-08-16	16:25:00	2018-08-16 16:25:00	74.7301	-95.1236	-0.88	30.14	2.38	1438.35	0.15	1.05
2018-08-16	16:26:00	2018-08-16 16:26:00	74.7301	-95.1236	-0.89	30.14	2.42	1438.35	0.13	1.06
2018-08-16	16:27:00	2018-08-16 16:27:00	74.7302	-95.1235	-0.88	30.13	2.32	1438.37	0.13	1.06
2018-08-16	16:28:00	2018-08-16 16:28:00	74.7302	-95.1235	-0.89	30.13	2.32	1438.34	0.14	1.05
2018-08-16	16:29:00	2018-08-16 16:29:00	74.7302	-95.1234	-0.89	30.13	2.35	1438.31	0.12	1.06
2018-08-16	16:30:00	2018-08-16 16:30:00	74.7302	-95.1234	-0.9	30.13	2.42	1438.3	0.1	1.06
2018-08-16	16:31:00	2018-08-16 16:31:00	74.7303	-95.1234	-0.89	30.13	2.45	1438.3	0.1	1.06
2018-08-16	16:32:00	2018-08-16 16:32:00	74.7303	-95.1234	-0.89	30.13	2.48	1438.32	0.1	1.06
2018-08-16	16:33:00	2018-08-16 16:33:00	74.7303	-95.1233	-0.89	30.13	2.35	1438.31	0.09	1.06
2018-08-16	16:34:00	2018-08-16 16:34:00	74.7304	-95.1233	-0.9	30.13	2.34	1438.28	0.06	1.06
2018-08-16	16:35:00	2018-08-16 16:35:00	74.7304	-95.1233	-0.91	30.13	2.33	1438.23	0.07	1.06
2018-08-16	16:36:00	2018-08-16 16:36:00	74.7304	-95.1233	-0.91	30.13	2.41	1438.2	0.07	1.06
2018-08-16	16:37:00	2018-08-16 16:37:00	74.7304	-95.1233	-0.92	30.13	2.38	1438.19	0.05	1.07
2018-08-16	16:38:00	2018-08-16 16:38:00	74.7304	-95.1233	-0.93	30.12	2.41	1438.13	0.03	1.06
2018-08-16	16:39:00	2018-08-16 16:39:00	74.7304	-95.1233	-0.93	30.11	2.56	1438.09	0	1.06
2018-08-16	16:40:00	2018-08-16 16:40:00	74.7304	-95.1233	-0.93	30.11	2.5	1438.11	0	1.06
2018-08-16	16:41:00	2018-08-16 16:41:00	74.7304	-95.1233	-0.93	30.1	2.41	1438.09	0	1.06
2018-08-16	16:42:00	2018-08-16 16:42:00	74.7304	-95.1234	-0.93	30.1	2.57	1438.06	0	1.06
2018-08-16	16:43:00	2018-08-16 16:43:00	74.7304	-95.1234	-0.94	30.1	2.43	1438.05	0	1.06
2018-08-16	16:44:00	2018-08-16 16:44:00	74.7304	-95.1234	-0.94	30.09	2.46	1438.04	0	1.06
2018-08-16	16:45:00	2018-08-16 16:45:00	74.7304	-95.1234	-0.94	30.09	2.46	1438.01	0	1.05
2018-08-16	16:46:00	2018-08-16 16:46:00	74.7304	-95.1234	-0.94	30.09	2.47	1438	0	1.06
2018-08-16	16:47:00	2018-08-16 16:47:00	74.7304	-95.1234	-0.94	30.09	2.45	1438.02	0	1.06
2018-08-16	16:48:00	2018-08-16 16:48:00	74.7304	-95.1234	-0.94	30.09	2.51	1438	0	1.06
2018-08-16	16:49:00	2018-08-16 16:49:00	74.7304	-95.1234	-0.95	30.09	2.44	1437.97	0	1.06
2018-08-16	16:50:00	2018-08-16 16:50:00	74.7304	-95.1234	-0.95	30.08	2.45	1437.97	0.03	1.06
2018-08-16	16:51:00	2018-08-16 16:51:00	74.7304	-95.1234	-0.95	30.09	2.38	1437.98	0.03	1.06
2018-08-16	16:52:00	2018-08-16 16:52:00	74.7304	-95.1234	-0.95	30.09	2.31	1438	0.02	1.06
2018-08-16	16:53:00	2018-08-16 16:53:00	74.7304	-95.1235	-0.95	30.09	2.25	1438	0.03	1.06
2018-08-16	16:54:00	2018-08-16 16:54:00	74.7304	-95.1235	-0.95	30.1	2.34	1437.99	0.01	1.06
2018-08-16	16:55:00	2018-08-16 16:55:00	74.7304	-95.1235	-0.95	30.1	2.41	1438.01	0	1.06
2018-08-16	16:56:00	2018-08-16 16:56:00	74.7304	-95.1235	-0.95	30.1	2.46	1438.02	0.03	1.06
2018-08-16	16:57:00	2018-08-16 16:57:00	74.7304	-95.1235	-0.94	30.1	2.46	1438.01	0.03	1.06
2018-08-16	16:58:00	2018-08-16 16:58:00	74.7304	-95.1235	-0.94	30.1	2.49	1438.05	0.01	1.07
2018-08-16	16:59:00	2018-08-16 16:59:00	74.7304	-95.1235	-0.94	30.1	2.36	1438.08	0	1.06
2018-08-16	17:00:00	2018-08-16 17:00:00	74.7304	-95.1235	-0.94	30.1	2.47	1438.03	0	1.06
2018-08-16	17:01:00	2018-08-16 17:01:00	74.7304	-95.1235	-0.94	30.1	2.45	1438.04	0.03	1.06
2018-08-16	17:02:00	2018-08-16 17:02:00	74.7304	-95.1236	-0.94	30.1	2.38	1438.06	0.03	1.06
2018-08-16	17:03:00	2018-08-16 17:03:00	74.7304	-95.1236	-0.94	30.1	2.46	1438.03	0	1.06
2018-08-16	17:04:00	2018-08-16 17:04:00	74.7304	-95.1236	-0.94	30.1	2.45	1438.03	0	1.05
2018-08-16	17:05:00	2018-08-16 17:05:00	74.7305	-95.1236	-0.94	30.1	2.46	1438.02	0.03	1.05
2018-08-16	17:06:00	2018-08-16 17:06:00	74.7305	-95.1236	-0.94	30.1	2.48	1438.01	0.03	1.05
2018-08-16	17:07:00	2018-08-16 17:07:00	74.7305	-95.1236	-0.94	30.1	2.56	1438.06	0.03	1.06
2018-08-16	17:08:00	2018-08-16 17:08:00	74.7305	-95.1236	-0.94	30.1	2.46	1438.06	0.03	1.06
2018-08-16	17:09:00	2018-08-16 17:09:00	74.7305	-95.1236	-0.95	30.1	2.6	1438	0.01	1.05
2018-08-16	17:10:00	2018-08-16 17:10:00	74.7305	-95.1236	-0.95	30.09	2.6	1437.95	0	1.06
2018-08-16	17:11:00	2018-08-16 17:11:00	74.7305	-95.1237	-0.95	30.1	2.43	1437.98	0	1.06
2018-08-16	17:12:00	2018-08-16 17:12:00	74.7305	-95.1237	-0.94	30.1	2.33	1437.99	0.03	1.05
2018-08-16	17:13:00	2018-08-16 17:13:00	74.7305	-95.1237	-0.95	30.1	2.32	1437.97	0.07	1.04
2018-08-16	17:14:00	2018-08-16 17:14:00	74.7305	-95.1237	-0.96	30.1	2.47	1437.97	0.04	1.05
2018-08-16	17:15:00	2018-08-16 17:15:00	74.7305	-95.1237	-0.96	30.1	2.43	1437.93	0.02	1.05
2018-08-16	17:16:00	2018-08-16 17:16:00	74.7305	-95.1238	-0.97	30.09	2.47	1437.89	0.06	1.04
2018-08-16	17:17:00	2018-08-16 17:17:00	74.7305	-95.1238	-0.97	30.09	2.54	1437.89	0.06	1.06
2018-08-16	17:18:00	2018-08-16 17:18:00	74.7305	-95.1238	-0.96	30.09	2.47	1437.92	0.05	1.06
2018-08-16	17:19:00	2018-08-16 17:19:00	74.7305	-95.1239	-0.96	30.09	2.51	1437.92	0.07	1.06
2018-08-16	17:20:00	2018-08-16 17:20:00	74.7305	-95.1239	-0.96	30.09	2.45	1437.96	0.08	1.06
2018-08-16	17:21:00	2018-08-16 17:21:00	74.7305	-95.1239	-0.96	30.09	2.52	1437.94	0.09	1.06
2018-08-16	17:22:00	2018-08-16 17:22:00	74.7305	-95.124	-0.95	30.09	2.42	1437.98	0.1	1.06
2018-08-16	17:23:00	2018-08-16 17:23:00	74.7305	-95.124	-0.96	30.09	2.32	1437.96	0.1	1.06
2018-08-16	17:24:00	2018-08-16 17:24:00	74.7306	-95.1241	-0.97	30.09	2.45	1437.89	0.1	1.06
2018-08-16	17:25:00	2018-08-16 17:25:00	74.7306	-95.1242	-0.98	30.08	2.34	1437.85	0.1	1.06
2018-08-16	17:26:00	2018-08-16 17:26:00	74.7306	-95.1242	-0.98	30.08	2.31	1437.83	0.1	1.06
2018-08-16	17:27:00	2018-08-16 17:27:00	74.7306	-95.1243	-0.99	30.08	2.31	1437.79	0.1	1.06
2018-08-16	17:28:00	2018-08-16 17:28:00	74.7306	-95.1243	-0.99	30.08	2.32	1437.78	0.1	1.06
2018-08-16	17:29:00	2018-08-16 17:29:00	74.7306	-95.1244	-1	30.07	2.27	1437.73	0.1	1.06
2018-08-16	17:30:00	2018-08-16 17:30:00	74.7306	-95.1244	-0.99	30.07	2.41	1437.73	0.1	1.06
2018-08-16	17:31:00	2018-08-16 17:31:00	74.7306	-95.1245	-0.98	30.07	2.25	1437.8	0.1	1.06
2018-08-16	17:32:00	2018-08-16 17:32:00	74.7307	-95.1245	-0.98	30.07	2.28	1437.81	0.1	1.06
2018-08-16	17:33:00	2018-08-16 17:33:00	74.7307	-95.1245	-0.98	30.07	2.35	1437.81	0.1	1.06
2018-08-16	17:34:00	2018-08-16 17:34:00	74.7307	-95.1246	-0.98	30.07	2.28	1437.82	0.1	1.06
2018-08-16	17:35:00	2018-08-16 17:35:00	74.7307	-95.1246	-0.98	30.07	2.32	1437.8	0.1	1.06
2018-08-16	17:36:00	2018-08-16 17:36:00	74.7307	-95.1247	-0.98	30.07	2.32	1437.79	0.08	1.06
2018-08-16	17:37:00	2018-08-16 17:37:00	74.7307	-95.1247	-0.99	30.07	2.26	1437.78	0.08	1.04
2018-08-16	17:38:00	2018-08-16 17:38:00	74.7307	-95.1247	-0.99	30.06	2.34	1437.75	0.1	1.04
2018-08-16	17:39:00	2018-08-16 17:39:00	74.7308	-95.1248	-0.99	30.06	2.23	1437.74	0.1	1.04
2018-08-16	17:40:00	2018-08-16 17:40:00	74.7308	-95.1248	-0.99	30.06	2.21	1437.74	0.09	1.03
2018-08-16	17:41:00	2018-08-16 17:41:00	74.7308	-95.1249	-0.99	30.06	2.28	1437.71	0.07	1.05
2018-08-16	17:42:00	2018-08-16 17:42:00	74.7308	-95.1249	-0.99	30.06	2.2	1437.7	0.08	1.06
2018-08-16	17:43:00	2018-08-16 17:43:00	74.7308	-95.125	-1	30.06	2.22	1437.69	0.1	1.06
2018-08-16	17:44:00	2018-08-16 17:44:00	74.7308	-95.125	-1	30.05	2.28	1437.65	0.1	1.05
2018-08-16	17:45:00	2018-08-16 17:45:00	74.7308	-95.1251	-1	30.05	2.3	1437.67	0.1	1.06
2018-08-16	17:46:00	2018-08-16 17:46:00	74.7308	-95.1251	-1	30.05	2.16	1437.71	0.1	1.06
2018-08-16	17:47:00	2018-08-16 17:47:00	74.7309	-95.1251	-1	30.05	2.13	1437.7	0.1	1.06
2018-08-16	17:48:00	2018-08-16 17:48:00	74.7309	-95.1252	-1	30.05	2.19	1437.66	0.07	1.05
2018-08-16	17:49:00	2018-08-16 17:49:00	74.7309	-95.1252	-1	30.05	2.17	1437.66	0.07	1.06
2018-08-16	17:50:00	2018-08-16 17:50:00	74.7309	-95.1253	-1	30.05	2.12	1437.64	0.1	1.06
2018-08-16	17:51:00	2018-08-16 17:51:00	74.7309	-95.1253	-1.01	30.05	2.22	1437.63	0.1	1.06
2018-08-16	17:52:00	2018-08-16 17:52:00	74.7309	-95.1254	-1	30.05	2.18	1437.67	0.1	1.06
2018-08-16	17:53:00	2018-08-16 17:53:00	74.7309	-95.1255	-1	30.05	2.22	1437.65	0.1	1.06
2018-08-16	17:54:00	2018-08-16 17:54:00	74.7309	-95.1255	-1	30.04	2.16	1437.68	0.1	1.06
2018-08-16	17:55:00	2018-08-16 17:55:00	74.7309	-95.1256	-1	30.04	2.15	1437.65	0.1	1.06
2018-08-16	17:56:00	2018-08-16 17:56:00	74.731	-95.1256	-1.01	30.04	2.14	1437.64	0.1	1.06
2018-08-16	17:57:00	2018-08-16 17:57:00	74.731	-95.1257	-1.01	30.04	2.15	1437.63	0.1	1.05
2018-08-16	17:58:00	2018-08-16 17:58:00	74.731	-95.1258	-1	30.04	2.19	1437.65	0.1	1.06
2018-08-16	17:59:00	2018-08-16 17:59:00	74.731	-95.1259	-1	30.04	2.16	1437.64	0.1	1.06
2018-08-16	18:00:00	2018-08-16 18:00:00	74.731	-95.126	-1.01	30.04	2.17	1437.63	0.1	1.06
2018-08-16	18:01:00	2018-08-16 18:01:00	74.731	-95.126	-1.01	30.03	2.15	1437.62	0.1	1.05
2018-08-16	18:02:00	2018-08-16 18:02:00	74.731	-95.1261	-1.01	30.03	2.26	1437.61	0.1	1.06
2018-08-16	18:03:00	2018-08-16 18:03:00	74.7311	-95.1262	-1	30.03	2.17	1437.63	0.1	1.05
2018-08-16	18:04:00	2018-08-16 18:04:00	74.7311	-95.1262	-1.01	30.03	2.23	1437.61	0.1	1.06
2018-08-16	18:05:00	2018-08-16 18:05:00	74.7311	-95.1263	-1.01	30.03	2.19	1437.63	0.1	1.05
2018-08-16	18:06:00	2018-08-16 18:06:00	74.7311	-95.1264	-1.01	30.03	2.2	1437.62	0.1	1.05
2018-08-16	18:07:00	2018-08-16 18:07:00	74.7311	-95.1265	-1.01	30.03	2.14	1437.62	0.1	1.06
2018-08-16	18:08:00	2018-08-16 18:08:00	74.7311	-95.1266	-1.01	30.03	2.17	1437.62	0.1	1.05
2018-08-16	18:09:00	2018-08-16 18:09:00	74.7312	-95.1266	-1.01	30.03	2.08	1437.61	0.1	1.05
2018-08-16	18:10:00	2018-08-16 18:10:00	74.7312	-95.1267	-1.01	30.03	2.15	1437.59	0.1	1.05
2018-08-16	18:11:00	2018-08-16 18:11:00	74.7312	-95.1268	-1.01	30.03	2.12	1437.61	0.1	1.05
2018-08-16	18:12:00	2018-08-16 18:12:00	74.7312	-95.1269	-1.01	30.03	2.19	1437.62	0.1	1.05
2018-08-16	18:13:00	2018-08-16 18:13:00	74.7312	-95.127	-1.01	30.03	2.24	1437.61	0.1	1.06
2018-08-16	18:14:00	2018-08-16 18:14:00	74.7313	-95.127	-1.01	30.03	2.27	1437.59	0.1	1.05
2018-08-16	18:15:00	2018-08-16 18:15:00	74.7313	-95.1271	-1.02	30.03	2.2	1437.58	0.1	1.06
2018-08-16	18:16:00	2018-08-16 18:16:00	74.7313	-95.1272	-1.02	30.03	2.19	1437.56	0.1	1.05
2018-08-16	18:17:00	2018-08-16 18:17:00	74.7313	-95.1273	-1.02	30.02	2.19	1437.58	0.1	1.06
2018-08-16	18:18:00	2018-08-16 18:18:00	74.7313	-95.1274	-1.02	30.02	2.24	1437.57	0.1	1.05
2018-08-16	18:19:00	2018-08-16 18:19:00	74.7313	-95.1275	-1.02	30.02	2.22	1437.57	0.1	1.05
2018-08-16	18:20:00	2018-08-16 18:20:00	74.7314	-95.1276	-1.02	30.02	2.22	1437.58	0.11	1.04
2018-08-16	18:21:00	2018-08-16 18:21:00	74.7314	-95.1277	-1.02	30.02	2.29	1437.53	0.15	1.04
2018-08-16	18:22:00	2018-08-16 18:22:00	74.7314	-95.1278	-1.02	30.02	2.23	1437.52	0.15	1.04
2018-08-16	18:23:00	2018-08-16 18:23:00	74.7314	-95.1279	-1.03	30.02	2.15	1437.51	0.12	1.05
2018-08-16	18:24:00	2018-08-16 18:24:00	74.7314	-95.1281	-1.03	30.02	2.24	1437.52	0.13	1.06
2018-08-16	18:25:00	2018-08-16 18:25:00	74.7314	-95.1282	-1.03	30.02	2.16	1437.52	0.13	1.06
2018-08-16	18:26:00	2018-08-16 18:26:00	74.7315	-95.1282	-1.04	30.02	2.19	1437.46	0.14	1.05
2018-08-16	18:27:00	2018-08-16 18:27:00	74.7315	-95.1284	-1.04	30.02	2.05	1437.46	0.14	1.05
2018-08-16	18:28:00	2018-08-16 18:28:00	74.7315	-95.1285	-1.04	30.01	2.11	1437.44	0.14	1.06
2018-08-16	18:29:00	2018-08-16 18:29:00	74.7315	-95.1286	-1.04	30.01	2.05	1437.44	0.16	1.06
2018-08-16	18:30:00	2018-08-16 18:30:00	74.7315	-95.1287	-1.05	30.01	2.12	1437.41	0.16	1.05
2018-08-16	18:31:00	2018-08-16 18:31:00	74.7316	-95.1288	-1.04	30.01	2.09	1437.43	0.14	1.06
2018-08-16	18:32:00	2018-08-16 18:32:00	74.7316	-95.129	-1.04	30.01	2.05	1437.44	0.15	1.05
2018-08-16	18:33:00	2018-08-16 18:33:00	74.7316	-95.1291	-1.04	30.01	2.11	1437.44	0.16	1.06
2018-08-16	18:34:00	2018-08-16 18:34:00	74.7316	-95.1292	-1.04	30.01	2.08	1437.47	0.16	1.06
2018-08-16	18:35:00	2018-08-16 18:35:00	74.7316	-95.1293	-1.04	30.01	2.05	1437.44	0.18	1.05
2018-08-16	18:36:00	2018-08-16 18:36:00	74.7317	-95.1295	-1.04	30.01	2	1437.42	0.19	1.06
2018-08-16	18:37:00	2018-08-16 18:37:00	74.7317	-95.1296	-1.04	30.01	2.03	1437.42	0.17	1.06
2018-08-16	18:38:00	2018-08-16 18:38:00	74.7317	-95.1297	-1.04	30.01	2.05	1437.47	0.13	1.06
2018-08-16	18:39:00	2018-08-16 18:39:00	74.7317	-95.1299	-1.04	30.02	2.03	1437.45	0.17	1.05
2018-08-16	18:40:00	2018-08-16 18:40:00	74.7318	-95.13	-1.04	30.02	2.16	1437.44	0.2	1.06
2018-08-16	18:41:00	2018-08-16 18:41:00	74.7318	-95.1301	-1.04	30.02	2.07	1437.45	0.2	1.06
2018-08-16	18:42:00	2018-08-16 18:42:00	74.7318	-95.1302	-1.04	30.02	2.11	1437.43	0.2	1.05
2018-08-16	18:43:00	2018-08-16 18:43:00	74.7319	-95.1304	-1.04	30.02	2.11	1437.45	0.2	1.06
2018-08-16	18:44:00	2018-08-16 18:44:00	74.7319	-95.1305	-1.04	30.02	2.1	1437.43	0.2	1.05
2018-08-16	18:45:00	2018-08-16 18:45:00	74.7319	-95.1307	-1.04	30.02	2.05	1437.44	0.2	1.06
2018-08-16	18:46:00	2018-08-16 18:46:00	74.732	-95.1308	-1.04	30.02	2.04	1437.42	0.2	1.06
2018-08-16	18:47:00	2018-08-16 18:47:00	74.732	-95.131	-1.04	30.02	2.04	1437.42	0.21	1.05
2018-08-16	18:48:00	2018-08-16 18:48:00	74.732	-95.1311	-1.05	30.02	2.12	1437.41	0.21	1.06
2018-08-16	18:49:00	2018-08-16 18:49:00	74.7321	-95.1313	-1.05	30.02	2.09	1437.44	0.2	1.06
2018-08-16	18:50:00	2018-08-16 18:50:00	74.7321	-95.1314	-1.04	30.01	2.12	1437.43	0.2	1.06
2018-08-16	18:51:00	2018-08-16 18:51:00	74.7321	-95.1315	-1.04	30.01	2.15	1437.45	0.14	1.06
2018-08-16	18:52:00	2018-08-16 18:52:00	74.7322	-95.1315	-1.03	30.01	2	1437.46	0.14	1.06
2018-08-16	18:53:00	2018-08-16 18:53:00	74.7322	-95.1317	-1.04	30.01	1.91	1437.47	0.25	1.05
2018-08-16	18:54:00	2018-08-16 18:54:00	74.7322	-95.1319	-1.04	30.01	2	1437.45	0.25	1.05
2018-08-16	18:55:00	2018-08-16 18:55:00	74.7322	-95.1321	-1.04	30.01	2.06	1437.48	0.2	1.04
2018-08-16	18:56:00	2018-08-16 18:56:00	74.7323	-95.1323	-1.04	30.02	2.09	1437.45	0.2	1.05
2018-08-16	18:57:00	2018-08-16 18:57:00	74.7323	-95.1325	-1.04	30.02	2.11	1437.44	0.2	1.04
2018-08-16	18:58:00	2018-08-16 18:58:00	74.7324	-95.1326	-1.05	30.02	2.14	1437.44	0.2	1.04
2018-08-16	18:59:00	2018-08-16 18:59:00	74.7324	-95.1328	-1.05	30.02	2.19	1437.4	0.2	1.04
2018-08-16	19:00:00	2018-08-16 19:00:00	74.7324	-95.133	-1.05	30.03	2.2	1437.43	0.2	1.04
2018-08-16	19:01:00	2018-08-16 19:01:00	74.7325	-95.1331	-1.01	30.03	2.37	1437.53	0.2	1.04
2018-08-16	19:02:00	2018-08-16 19:02:00	74.7325	-95.1333	-1.01	30.03	2.46	1437.61	0.2	1.04
2018-08-16	19:03:00	2018-08-16 19:03:00	74.7326	-95.1334	-1	30.04	2.52	1437.64	0.2	1.04
2018-08-16	19:04:00	2018-08-16 19:04:00	74.7326	-95.1336	-1.01	30.04	2.58	1437.64	0.2	1.04
2018-08-16	19:05:00	2018-08-16 19:05:00	74.7326	-95.1337	-1.02	30.05	2.71	1437.59	0.18	1.04
2018-08-16	19:06:00	2018-08-16 19:06:00	74.7327	-95.1338	-1.02	30.05	2.78	1437.6	0.14	1.04
2018-08-16	19:07:00	2018-08-16 19:07:00	74.7327	-95.1339	-1.01	30.06	2.76	1437.62	0.09	1.04
2018-08-16	19:08:00	2018-08-16 19:08:00	74.7327	-95.1339	-1.01	30.06	2.8	1437.67	0.09	1.04
2018-08-16	19:09:00	2018-08-16 19:09:00	74.7327	-95.1338	-0.98	30.06	2.86	1437.76	0.11	1.04
2018-08-16	19:10:00	2018-08-16 19:10:00	74.7327	-95.1337	-0.99	30.06	2.74	1437.78	0.09	1.04
2018-08-16	19:11:00	2018-08-16 19:11:00	74.7327	-95.1337	-0.99	30.06	2.74	1437.74	0.1	1.04
2018-08-16	19:12:00	2018-08-16 19:12:00	74.7327	-95.1338	-0.99	30.06	2.75	1437.76	0.07	1.04
2018-08-16	19:13:00	2018-08-16 19:13:00	74.7327	-95.1338	-0.98	30.06	2.86	1437.78	0.06	1.05
2018-08-16	19:14:00	2018-08-16 19:14:00	74.7327	-95.1338	-0.98	30.06	2.89	1437.83	0.1	1.04
2018-08-16	19:15:00	2018-08-16 19:15:00	74.7327	-95.1339	-0.98	30.07	2.92	1437.82	0.17	1.05
2018-08-16	19:16:00	2018-08-16 19:16:00	74.7328	-95.1341	-0.98	30.07	2.89	1437.82	0.2	1.04
2018-08-16	19:17:00	2018-08-16 19:17:00	74.7328	-95.1342	-0.96	30.07	2.93	1437.87	0.2	1.04
2018-08-16	19:18:00	2018-08-16 19:18:00	74.7328	-95.1343	-0.86	30.07	2.92	1438.3	0.24	1.04
2018-08-16	19:19:00	2018-08-16 19:19:00	74.7329	-95.1345	-0.87	30.06	2.91	1438.29	0.26	1.04
2018-08-16	19:20:00	2018-08-16 19:20:00	74.733	-95.1347	-0.9	30.06	2.81	1438.24	0.22	1.03
2018-08-16	19:21:00	2018-08-16 19:21:00	74.733	-95.1349	-0.92	30.06	2.91	1438.08	0.2	1.04
2018-08-16	19:22:00	2018-08-16 19:22:00	74.733	-95.135	-0.95	30.07	2.98	1437.97	0.23	1.04
2018-08-16	19:23:00	2018-08-16 19:23:00	74.7331	-95.1352	-0.95	30.07	2.88	1437.98	0.27	1.04
2018-08-16	19:24:00	2018-08-16 19:24:00	74.7331	-95.1353	-0.94	30.07	2.97	1437.99	0.27	1.04
2018-08-16	19:25:00	2018-08-16 19:25:00	74.7332	-95.1355	-0.95	30.07	2.85	1437.98	0.26	1.04
2018-08-16	19:26:00	2018-08-16 19:26:00	74.7332	-95.1356	-0.96	30.07	2.87	1437.88	0.23	1.04
2018-08-16	19:27:00	2018-08-16 19:27:00	74.7333	-95.1358	-0.95	30.07	2.87	1437.92	0.18	1.04
2018-08-16	19:28:00	2018-08-16 19:28:00	74.7333	-95.1359	-0.96	30.06	2.83	1437.93	0.18	1.04
2018-08-16	19:29:00	2018-08-16 19:29:00	74.7334	-95.136	-0.97	30.06	2.79	1437.87	0.19	1.04
2018-08-16	19:30:00	2018-08-16 19:30:00	74.7334	-95.1361	-0.99	30.06	2.76	1437.77	0.19	1.04
2018-08-16	19:31:00	2018-08-16 19:31:00	74.7334	-95.1362	-0.99	30.05	2.76	1437.74	0.2	1.04
2018-08-16	19:32:00	2018-08-16 19:32:00	74.7335	-95.1363	-0.98	30.05	2.65	1437.76	0.16	1.03
2018-08-16	19:33:00	2018-08-16 19:33:00	74.7335	-95.1363	-1	30.04	2.6	1437.69	0.12	1.04
2018-08-16	19:34:00	2018-08-16 19:34:00	74.7335	-95.1364	-1.02	30.03	2.67	1437.57	0.15	1.04
2018-08-16	19:35:00	2018-08-16 19:35:00	74.7335	-95.1365	-1.03	30.02	2.53	1437.52	0.18	1.04
2018-08-16	19:36:00	2018-08-16 19:36:00	74.7335	-95.1364	-1.05	30.02	2.59	1437.43	0.17	1.04
2018-08-16	19:37:00	2018-08-16 19:37:00	74.7335	-95.1364	-1.08	30.01	2.57	1437.28	0.17	1.04
2018-08-16	19:38:00	2018-08-16 19:38:00	74.7335	-95.1364	-1.08	30	2.53	1437.28	0.15	1.04
2018-08-16	19:39:00	2018-08-16 19:39:00	74.7335	-95.1364	-1.09	30	2.51	1437.21	0.09	1.03
2018-08-16	19:40:00	2018-08-16 19:40:00	74.7335	-95.1364	-1.09	30	2.51	1437.2	0.08	1.03
2018-08-16	19:41:00	2018-08-16 19:41:00	74.7335	-95.1364	-1.1	30	2.49	1437.16	0.1	1.03
2018-08-16	19:42:00	2018-08-16 19:42:00	74.7335	-95.1365	-1.1	30	2.52	1437.17	0.07	1.04
2018-08-16	19:43:00	2018-08-16 19:43:00	74.7335	-95.1364	-1.09	30	2.56	1437.17	0.25	1.03
2018-08-16	19:44:00	2018-08-16 19:44:00	74.7334	-95.1362	-1.1	30	2.6	1437.16	0.32	1.03
2018-08-16	19:45:00	2018-08-16 19:45:00	74.7334	-95.136	-1.12	30	2.6	1437.08	0.13	1.03
2018-08-16	19:46:00	2018-08-16 19:46:00	74.7334	-95.136	-1.12	29.99	2.64	1437.04	0.04	1.03
2018-08-16	19:47:00	2018-08-16 19:47:00	74.7334	-95.136	-1.12	29.99	2.61	1437.05	0.07	1.03
2018-08-16	19:48:00	2018-08-16 19:48:00	74.7334	-95.136	-1.12	29.99	2.71	1437.04	0.1	1.03
2018-08-16	19:49:00	2018-08-16 19:49:00	74.7334	-95.1361	-1.12	30	2.72	1437.06	0.1	1.03
2018-08-16	19:50:00	2018-08-16 19:50:00	74.7335	-95.1361	-1.12	30	2.84	1437.07	0.1	1.03
2018-08-16	19:51:00	2018-08-16 19:51:00	74.7335	-95.1362	-1.1	30	2.76	1437.1	0.1	1.03
2018-08-16	19:52:00	2018-08-16 19:52:00	74.7335	-95.1362	-1.07	30.01	2.91	1437.28	0.1	1.04
2018-08-16	19:53:00	2018-08-16 19:53:00	74.7335	-95.1363	-1.06	30.03	3.06	1437.37	0.1	1.03
2018-08-16	19:54:00	2018-08-16 19:54:00	74.7335	-95.1363	-1.05	30.05	3.11	1437.43	0.1	1.03
2018-08-16	19:55:00	2018-08-16 19:55:00	74.7335	-95.1364	-1.04	30.05	3.05	1437.49	0.1	1.03
2018-08-16	19:56:00	2018-08-16 19:56:00	74.7336	-95.1364	-1.03	30.06	3.09	1437.54	0.1	1.03
2018-08-16	19:57:00	2018-08-16 19:57:00	74.7336	-95.1364	-1.03	30.06	3.15	1437.55	0.1	1.03
2018-08-16	19:58:00	2018-08-16 19:58:00	74.7336	-95.1365	-1.03	30.06	3.1	1437.57	0.07	1.03
2018-08-16	19:59:00	2018-08-16 19:59:00	74.7336	-95.1365	-1.03	30.06	3.14	1437.53	0.05	1.03
2018-08-16	20:00:00	2018-08-16 20:00:00	74.7336	-95.1366	-1.03	30.06	3.15	1437.55	0.07	1.03
2018-08-16	20:01:00	2018-08-16 20:01:00	74.7336	-95.1366	-1.03	30.06	3.16	1437.54	0.07	1.02
2018-08-16	20:02:00	2018-08-16 20:02:00	74.7336	-95.1366	-1.03	30.06	3.16	1437.56	0.07	1.03
2018-08-16	20:03:00	2018-08-16 20:03:00	74.7336	-95.1366	-1.03	30.06	3.19	1437.57	0.07	1.03
2018-08-16	20:04:00	2018-08-16 20:04:00	74.7336	-95.1367	-1.03	30.06	3.21	1437.57	0.06	1.03
2018-08-16	20:05:00	2018-08-16 20:05:00	74.7336	-95.1367	-1.03	30.06	3.21	1437.58	0.05	1.03
2018-08-16	20:06:00	2018-08-16 20:06:00	74.7336	-95.1367	-1.03	30.06	3.29	1437.55	0.04	1.02
2018-08-16	20:07:00	2018-08-16 20:07:00	74.7336	-95.1367	-1.05	30.06	3.18	1437.56	0.03	1.03
2018-08-16	20:08:00	2018-08-16 20:08:00	74.7336	-95.1367	-1.06	30.05	3.12	1437.39	0.06	1.03
2018-08-16	20:09:00	2018-08-16 20:09:00	74.7336	-95.1367	-1.09	30.03	2.93	1437.27	0.08	1.04
2018-08-16	20:10:00	2018-08-16 20:10:00	74.7336	-95.1367	-1.1	30.02	2.89	1437.17	0.03	1.04
2018-08-16	20:11:00	2018-08-16 20:11:00	74.7336	-95.1367	-1.12	30.01	2.88	1437.08	0	1.04
2018-08-16	20:12:00	2018-08-16 20:12:00	74.7336	-95.1367	-1.12	30	2.77	1437.02	0	1.04
2018-08-16	20:13:00	2018-08-16 20:13:00	74.7336	-95.1367	-1.13	29.99	2.82	1436.97	0	1.05
2018-08-16	20:14:00	2018-08-16 20:14:00	74.7336	-95.1367	-1.14	29.99	2.65	1436.96	0	1.04
2018-08-16	20:15:00	2018-08-16 20:15:00	74.7336	-95.1367	-1.15	29.98	2.66	1436.88	0	1.05
2018-08-16	20:16:00	2018-08-16 20:16:00	74.7336	-95.1367	-1.15	29.98	2.58	1436.87	0	1.04
2018-08-16	20:17:00	2018-08-16 20:17:00	74.7336	-95.1367	-1.15	29.98	2.67	1436.84	0	1.04
2018-08-16	20:18:00	2018-08-16 20:18:00	74.7336	-95.1367	-1.15	29.98	2.6	1436.88	0	1.04
2018-08-16	20:19:00	2018-08-16 20:19:00	74.7336	-95.1367	-1.15	29.98	2.71	1436.84	0	1.04
2018-08-16	20:20:00	2018-08-16 20:20:00	74.7336	-95.1367	-1.16	29.98	2.72	1436.85	0	1.05
2018-08-16	20:21:00	2018-08-16 20:21:00	74.7336	-95.1367	-1.15	29.98	2.69	1436.84	0	1.05
2018-08-16	20:22:00	2018-08-16 20:22:00	74.7336	-95.1367	-1.15	29.98	2.78	1436.86	0.01	1.05
2018-08-16	20:23:00	2018-08-16 20:23:00	74.7336	-95.1366	-1.15	29.98	2.8	1436.88	0.01	1.05
2018-08-16	20:24:00	2018-08-16 20:24:00	74.7336	-95.1366	-1.14	29.98	2.83	1436.89	0	1.05
2018-08-16	20:25:00	2018-08-16 20:25:00	74.7336	-95.1366	-1.14	29.99	2.79	1436.92	0.01	1.05
2018-08-16	20:26:00	2018-08-16 20:26:00	74.7336	-95.1366	-1.14	29.99	2.91	1436.93	0.05	1.05
2018-08-16	20:27:00	2018-08-16 20:27:00	74.7336	-95.1366	-1.14	29.99	2.86	1436.96	0.04	1.05
2018-08-16	20:28:00	2018-08-16 20:28:00	74.7337	-95.1366	-1.14	29.99	2.82	1436.97	0	1.05
2018-08-16	20:29:00	2018-08-16 20:29:00	74.7337	-95.1365	-1.14	29.99	2.96	1436.97	0	1.05
2018-08-16	20:30:00	2018-08-16 20:30:00	74.7337	-95.1365	-1.13	29.99	2.85	1436.98	0.02	1.05
2018-08-16	20:31:00	2018-08-16 20:31:00	74.7337	-95.1365	-1.13	29.99	2.88	1436.97	0.04	1.05
2018-08-16	20:32:00	2018-08-16 20:32:00	74.7337	-95.1364	-1.13	29.99	2.86	1436.97	0.03	1.05
2018-08-16	20:33:00	2018-08-16 20:33:00	74.7337	-95.1364	-1.14	29.99	2.95	1436.97	0	1.05
2018-08-16	20:34:00	2018-08-16 20:34:00	74.7337	-95.1364	-1.14	29.99	2.93	1436.97	0.03	1.05
2018-08-16	20:35:00	2018-08-16 20:35:00	74.7337	-95.1364	-1.14	29.99	2.83	1436.96	0.03	1.05
2018-08-16	20:36:00	2018-08-16 20:36:00	74.7337	-95.1364	-1.14	30	2.95	1436.96	0	1.05
2018-08-16	20:37:00	2018-08-16 20:37:00	74.7337	-95.1364	-1.13	30	2.94	1436.99	0.01	1.05
2018-08-16	20:38:00	2018-08-16 20:38:00	74.7337	-95.1364	-1.13	30	2.92	1436.98	0.03	1.05
2018-08-16	20:39:00	2018-08-16 20:39:00	74.7337	-95.1364	-1.13	30	2.88	1437.02	0.02	1.05
2018-08-16	20:40:00	2018-08-16 20:40:00	74.7337	-95.1364	-1.12	30	2.92	1437.01	0	1.05
2018-08-16	20:41:00	2018-08-16 20:41:00	74.7337	-95.1364	-1.12	30	2.98	1437.04	0	1.05
2018-08-16	20:42:00	2018-08-16 20:42:00	74.7337	-95.1364	-1.12	30	3.04	1437.03	0.02	1.05
2018-08-16	20:43:00	2018-08-16 20:43:00	74.7337	-95.1364	-1.12	30.01	2.96	1437.07	0.02	1.05
2018-08-16	20:44:00	2018-08-16 20:44:00	74.7337	-95.1364	-1.11	30.02	3.07	1437.1	0.02	1.05
2018-08-16	20:45:00	2018-08-16 20:45:00	74.7337	-95.1364	-1.11	30.02	3.05	1437.12	0.03	1.05
2018-08-16	20:46:00	2018-08-16 20:46:00	74.7337	-95.1364	-1.12	30.02	3.05	1437.09	0.03	1.05
2018-08-16	20:47:00	2018-08-16 20:47:00	74.7337	-95.1364	-1.12	30.02	2.98	1437.07	0.01	1.05
2018-08-16	20:48:00	2018-08-16 20:48:00	74.7337	-95.1364	-1.12	30.02	3.07	1437.07	0	1.05
2018-08-16	20:49:00	2018-08-16 20:49:00	74.7337	-95.1364	-1.12	30.01	3.07	1437.03	0	1.05
2018-08-16	20:50:00	2018-08-16 20:50:00	74.7337	-95.1364	-1.12	30.01	3.05	1437.05	0	1.05
2018-08-16	20:51:00	2018-08-16 20:51:00	74.7337	-95.1364	-1.12	30.01	3.05	1437.04	0	1.05
2018-08-16	20:52:00	2018-08-16 20:52:00	74.7337	-95.1364	-1.12	30.01	3.02	1437.03	0.02	1.05
2018-08-16	20:53:00	2018-08-16 20:53:00	74.7337	-95.1364	-1.13	30.01	3.04	1437.03	0.03	1.05
2018-08-16	20:54:00	2018-08-16 20:54:00	74.7337	-95.1364	-1.13	30	2.99	1437	0.01	1.05
2018-08-16	20:55:00	2018-08-16 20:55:00	74.7337	-95.1364	-1.13	30	3.04	1436.98	0	1.05
2018-08-16	20:56:00	2018-08-16 20:56:00	74.7337	-95.1364	-1.13	30	2.97	1436.99	0	1.05
2018-08-16	20:57:00	2018-08-16 20:57:00	74.7337	-95.1364	-1.13	30	2.99	1436.98	0	1.05
2018-08-16	20:58:00	2018-08-16 20:58:00	74.7337	-95.1364	-1.13	30	3.13	1436.98	0	1.05
2018-08-16	20:59:00	2018-08-16 20:59:00	74.7337	-95.1364	-1.12	30.01	3.1	1437.05	0	1.05
2018-08-16	21:00:00	2018-08-16 21:00:00	74.7337	-95.1364	-1.11	30.02	3.08	1437.09	0	1.05
2018-08-16	21:01:00	2018-08-16 21:01:00	74.7337	-95.1364	-1.1	30.03	3.15	1437.18	0	1.05
2018-08-16	21:02:00	2018-08-16 21:02:00	74.7337	-95.1364	-1.08	30.04	3.21	1437.28	0.03	1.05
2018-08-16	21:03:00	2018-08-16 21:03:00	74.7337	-95.1364	-1.05	30.07	3.34	1437.48	0.03	1.05
2018-08-16	21:04:00	2018-08-16 21:04:00	74.7337	-95.1364	-1.03	30.1	3.32	1437.61	0	1.05
2018-08-16	21:05:00	2018-08-16 21:05:00	74.7337	-95.1364	-1.02	30.12	3.34	1437.69	0	1.05
2018-08-16	21:06:00	2018-08-16 21:06:00	74.7337	-95.1364	-1.01	30.13	3.5	1437.73	0	1.05
2018-08-16	21:07:00	2018-08-16 21:07:00	74.7337	-95.1364	-1.01	30.14	3.48	1437.78	0.01	1.05
2018-08-16	21:08:00	2018-08-16 21:08:00	74.7337	-95.1364	-1	30.14	3.45	1437.78	0.01	1.05
2018-08-16	21:09:00	2018-08-16 21:09:00	74.7337	-95.1364	-1	30.14	3.47	1437.79	0	1.05
2018-08-16	21:10:00	2018-08-16 21:10:00	74.7337	-95.1364	-1	30.14	3.37	1437.79	0	1.05
2018-08-16	21:11:00	2018-08-16 21:11:00	74.7337	-95.1364	-1	30.14	3.42	1437.82	0.03	1.05
2018-08-16	21:12:00	2018-08-16 21:12:00	74.7337	-95.1364	-1	30.14	3.27	1437.8	0.04	1.05
2018-08-16	21:13:00	2018-08-16 21:13:00	74.7337	-95.1364	-1	30.14	3.34	1437.8	0.02	1.06
2018-08-16	21:14:00	2018-08-16 21:14:00	74.7337	-95.1364	-1	30.14	3.19	1437.79	0	1.05
2018-08-16	21:15:00	2018-08-16 21:15:00	74.7337	-95.1364	-1	30.13	3.12	1437.8	0.01	1.05
2018-08-16	21:16:00	2018-08-16 21:16:00	74.7337	-95.1364	-1	30.13	3.12	1437.78	0.02	1.05
2018-08-16	21:17:00	2018-08-16 21:17:00	74.7337	-95.1364	-1	30.13	3.11	1437.77	0.01	1.05
2018-08-16	21:18:00	2018-08-16 21:18:00	74.7337	-95.1364	-1	30.12	3.1	1437.76	0	1.05
2018-08-16	21:19:00	2018-08-16 21:19:00	74.7337	-95.1364	-1.01	30.12	3.11	1437.77	0	1.06
2018-08-16	21:20:00	2018-08-16 21:20:00	74.7337	-95.1364	-1.01	30.12	3.06	1437.72	0	1.05
2018-08-16	21:21:00	2018-08-16 21:21:00	74.7337	-95.1364	-1.01	30.12	3.09	1437.71	0	1.05
2018-08-16	21:22:00	2018-08-16 21:22:00	74.7337	-95.1364	-1.01	30.12	3.08	1437.69	0.01	1.05
2018-08-16	21:23:00	2018-08-16 21:23:00	74.7337	-95.1364	-1.02	30.11	3.13	1437.68	0.01	1.06
2018-08-16	21:24:00	2018-08-16 21:24:00	74.7337	-95.1364	-1.02	30.1	3.15	1437.65	0	1.05
2018-08-16	21:25:00	2018-08-16 21:25:00	74.7337	-95.1364	-1.03	30.09	3.13	1437.61	0	1.05
2018-08-16	21:26:00	2018-08-16 21:26:00	74.7337	-95.1364	-1.03	30.09	3	1437.6	0	1.05
2018-08-16	21:27:00	2018-08-16 21:27:00	74.7337	-95.1364	-1.04	30.08	2.92	1437.53	0	1.05
2018-08-16	21:28:00	2018-08-16 21:28:00	74.7337	-95.1364	-1.04	30.06	2.99	1437.52	0	1.06
2018-08-16	21:29:00	2018-08-16 21:29:00	74.7337	-95.1364	-1.04	30.04	2.94	1437.44	0	1.06
2018-08-16	21:30:00	2018-08-16 21:30:00	74.7337	-95.1364	-1.05	30.02	2.93	1437.41	0	1.05
2018-08-16	21:31:00	2018-08-16 21:31:00	74.7337	-95.1364	-1.05	30.01	2.98	1437.36	0	1.05
2018-08-16	21:32:00	2018-08-16 21:32:00	74.7337	-95.1364	-1.05	30.01	2.93	1437.37	0	1.05
2018-08-16	21:33:00	2018-08-16 21:33:00	74.7338	-95.1363	-1.06	29.98	2.98	1437.33	0	1.04
2018-08-16	21:34:00	2018-08-16 21:34:00	74.7338	-95.1363	-1.06	29.98	2.9	1437.28	0	1.04
2018-08-16	21:35:00	2018-08-16 21:35:00	74.7338	-95.1363	-1.06	29.96	2.91	1437.26	0	1.04
2018-08-16	21:36:00	2018-08-16 21:36:00	74.7338	-95.1363	-1.06	29.95	2.84	1437.23	0	1.04
2018-08-16	21:37:00	2018-08-16 21:37:00	74.7338	-95.1363	-1.06	29.94	2.72	1437.22	0	1.04
2018-08-16	21:38:00	2018-08-16 21:38:00	74.7337	-95.1363	-1.06	29.93	2.74	1437.21	0	1.04
2018-08-16	21:39:00	2018-08-16 21:39:00	74.7337	-95.1363	-1.08	29.93	2.73	1437.17	0	1.05
2018-08-16	21:40:00	2018-08-16 21:40:00	74.7337	-95.1363	-1.09	29.94	2.74	1437.16	0	1.05
2018-08-16	21:41:00	2018-08-16 21:41:00	74.7337	-95.1362	-1.1	29.94	2.84	1437.07	0	1.05
2018-08-16	21:42:00	2018-08-16 21:42:00	74.7337	-95.1362	-1.11	29.96	2.82	1437.08	0	1.05
2018-08-16	21:43:00	2018-08-16 21:43:00	74.7337	-95.1362	-1.11	29.96	3.02	1437.06	0.01	1.05
2018-08-16	21:44:00	2018-08-16 21:44:00	74.7337	-95.1362	-1.11	29.97	2.92	1437.08	0.02	1.05
2018-08-16	21:45:00	2018-08-16 21:45:00	74.7337	-95.1362	-1.11	29.97	2.89	1437.06	0.01	1.05
2018-08-16	21:46:00	2018-08-16 21:46:00	74.7337	-95.1362	-1.11	29.97	2.87	1437.07	0	1.06
2018-08-16	21:47:00	2018-08-16 21:47:00	74.7337	-95.1362	-1.11	29.97	2.91	1437.06	0.01	1.05
2018-08-16	21:48:00	2018-08-16 21:48:00	74.7337	-95.1362	-1.11	29.97	2.96	1437.04	0.01	1.06
2018-08-16	21:49:00	2018-08-16 21:49:00	74.7337	-95.1362	-1.12	29.97	2.96	1437.05	0	1.05
2018-08-16	21:50:00	2018-08-16 21:50:00	74.7337	-95.1362	-1.12	29.98	3.01	1437.02	0	1.05
2018-08-16	21:51:00	2018-08-16 21:51:00	74.7337	-95.1362	-1.12	29.98	3.03	1437.03	0.03	1.05
2018-08-16	21:52:00	2018-08-16 21:52:00	74.7337	-95.1361	-1.12	29.98	3.03	1436.99	0.04	1.05
2018-08-16	21:53:00	2018-08-16 21:53:00	74.7337	-95.1361	-1.12	29.98	2.98	1437.01	0.02	1.05
2018-08-16	21:54:00	2018-08-16 21:54:00	74.7337	-95.1361	-1.12	29.98	3.09	1436.99	0	1.05
2018-08-16	21:55:00	2018-08-16 21:55:00	74.7337	-95.1361	-1.11	29.97	2.99	1437.03	0.01	1.05
2018-08-16	21:56:00	2018-08-16 21:56:00	74.7337	-95.1361	-1.1	29.96	2.96	1437.07	0.01	1.05
2018-08-16	21:57:00	2018-08-16 21:57:00	74.7337	-95.1361	-1.09	29.95	2.95	1437.09	0	1.05
2018-08-16	21:58:00	2018-08-16 21:58:00	74.7337	-95.1361	-1.09	29.95	2.85	1437.11	0	1.05
2018-08-16	21:59:00	2018-08-16 21:59:00	74.7337	-95.1361	-1.09	29.94	2.94	1437.1	0.02	1.05
2018-08-16	22:00:00	2018-08-16 22:00:00	74.7337	-95.1361	-1.1	29.94	2.84	1437.11	0.03	1.05
2018-08-16	22:01:00	2018-08-16 22:01:00	74.7337	-95.1361	-1.09	29.95	2.93	1437.1	0.04	1.05
2018-08-16	22:02:00	2018-08-16 22:02:00	74.7337	-95.1361	-1.09	29.96	2.81	1437.14	0.02	1.05
2018-08-16	22:03:00	2018-08-16 22:03:00	74.7337	-95.1361	-1.1	29.96	2.9	1437.09	0.01	1.05
2018-08-16	22:04:00	2018-08-16 22:04:00	74.7337	-95.1361	-1.1	29.95	2.87	1437.1	0.01	1.06
2018-08-16	22:05:00	2018-08-16 22:05:00	74.7337	-95.1361	-1.1	29.95	2.93	1437.06	0.01	1.05
2018-08-16	22:06:00	2018-08-16 22:06:00	74.7337	-95.1361	-1.1	29.95	2.83	1437.04	0.03	1.05
2018-08-16	22:07:00	2018-08-16 22:07:00	74.7337	-95.1361	-1.1	29.95	2.82	1437.03	0.02	1.05
2018-08-16	22:08:00	2018-08-16 22:08:00	74.7337	-95.1361	-1.1	29.95	2.93	1437.03	0	1.05
2018-08-16	22:09:00	2018-08-16 22:09:00	74.7337	-95.1361	-1.1	29.95	3.01	1437.07	0	1.05
2018-08-16	22:10:00	2018-08-16 22:10:00	74.7337	-95.1361	-1.1	29.95	2.95	1437.07	0	1.05
2018-08-16	22:11:00	2018-08-16 22:11:00	74.7337	-95.1361	-1.09	29.94	2.78	1437.09	0.02	1.05
2018-08-16	22:12:00	2018-08-16 22:12:00	74.7337	-95.1361	-1.09	29.94	2.74	1437.1	0.02	1.05
2018-08-16	22:13:00	2018-08-16 22:13:00	74.7337	-95.1361	-1.09	29.96	2.92	1437.12	0	1.06
2018-08-16	22:14:00	2018-08-16 22:14:00	74.7337	-95.1361	-1.09	29.96	2.77	1437.13	0	1.05
2018-08-16	22:15:00	2018-08-16 22:15:00	74.7337	-95.1361	-1.1	29.96	2.86	1437.09	0.03	1.05
2018-08-16	22:16:00	2018-08-16 22:16:00	74.7337	-95.1362	-1.1	29.96	2.87	1437.07	0.05	1.06
2018-08-16	22:17:00	2018-08-16 22:17:00	74.7337	-95.1362	-1.11	29.96	2.78	1437.05	0.04	1.05
2018-08-16	22:18:00	2018-08-16 22:18:00	74.7337	-95.1361	-1.12	29.96	2.8	1437.01	0.02	1.05
2018-08-16	22:19:00	2018-08-16 22:19:00	74.7337	-95.1361	-1.12	29.96	2.79	1436.99	0	1.05
2018-08-16	22:20:00	2018-08-16 22:20:00	74.7337	-95.1361	-1.13	29.96	2.7	1436.99	0	1.05
2018-08-16	22:21:00	2018-08-16 22:21:00	74.7337	-95.1361	-1.13	29.96	2.8	1436.98	0	1.05
2018-08-16	22:22:00	2018-08-16 22:22:00	74.7337	-95.1361	-1.13	29.96	2.83	1436.96	0	1.05
2018-08-16	22:23:00	2018-08-16 22:23:00	74.7337	-95.1361	-1.13	29.96	2.74	1436.97	0	1.05
2018-08-16	22:24:00	2018-08-16 22:24:00	74.7337	-95.1361	-1.13	29.96	2.75	1436.96	0	1.05
2018-08-16	22:25:00	2018-08-16 22:25:00	74.7337	-95.1361	-1.13	29.96	2.8	1436.97	0	1.05
2018-08-16	22:26:00	2018-08-16 22:26:00	74.7337	-95.1361	-1.13	29.96	2.69	1436.96	0	1.05
2018-08-16	22:27:00	2018-08-16 22:27:00	74.7337	-95.1361	-1.13	29.96	2.79	1436.94	0	1.05
2018-08-16	22:28:00	2018-08-16 22:28:00	74.7337	-95.1361	-1.13	29.97	2.72	1436.95	0	1.05
2018-08-16	22:29:00	2018-08-16 22:29:00	74.7337	-95.1361	-1.13	29.97	2.84	1436.92	0	1.05
2018-08-16	22:30:00	2018-08-16 22:30:00	74.7337	-95.1361	-1.14	29.97	2.83	1436.92	0	1.05
2018-08-16	22:31:00	2018-08-16 22:31:00	74.7337	-95.1361	-1.13	29.97	2.78	1436.95	0.01	1.05
2018-08-16	22:32:00	2018-08-16 22:32:00	74.7337	-95.1361	-1.13	29.97	2.79	1436.95	0.02	1.05
2018-08-16	22:33:00	2018-08-16 22:33:00	74.7337	-95.1361	-1.13	29.97	2.78	1436.94	0.01	1.05
2018-08-16	22:34:00	2018-08-16 22:34:00	74.7337	-95.1361	-1.13	29.97	2.88	1436.96	0	1.05
2018-08-16	22:35:00	2018-08-16 22:35:00	74.7337	-95.1361	-1.12	29.97	2.94	1436.97	0	1.05
2018-08-16	22:36:00	2018-08-16 22:36:00	74.7337	-95.1361	-1.12	29.97	2.94	1437.04	0.02	1.05
2018-08-16	22:37:00	2018-08-16 22:37:00	74.7337	-95.1361	-1.08	29.97	3.01	1437.09	0.02	1.05
2018-08-16	22:38:00	2018-08-16 22:38:00	74.7337	-95.1361	-1	29.97	2.99	1437.54	0	1.05
2018-08-16	22:39:00	2018-08-16 22:39:00	74.7337	-95.1361	-0.96	29.97	3.05	1437.74	0	1.04
2018-08-16	22:40:00	2018-08-16 22:40:00	74.7337	-95.1361	-1	29.98	3.06	1437.59	0	1.04
2018-08-16	22:41:00	2018-08-16 22:41:00	74.7337	-95.1361	-1.03	29.98	3	1437.47	0	1.05
2018-08-16	22:42:00	2018-08-16 22:42:00	74.7337	-95.1361	-1.07	29.98	3.11	1437.29	0.03	1.06
2018-08-16	22:43:00	2018-08-16 22:43:00	74.7337	-95.1361	-1.08	29.97	3.07	1437.18	0.03	1.06
2018-08-16	22:44:00	2018-08-16 22:44:00	74.7337	-95.1361	-1.09	29.97	3.07	1437.12	0	1.06
2018-08-16	22:45:00	2018-08-16 22:45:00	74.7337	-95.1361	-1.1	29.98	3.04	1437.09	0	1.06
2018-08-16	22:46:00	2018-08-16 22:46:00	74.7337	-95.1361	-1.11	29.97	3.06	1437.06	0	1.05
2018-08-16	22:47:00	2018-08-16 22:47:00	74.7337	-95.1361	-1.11	29.97	3.06	1437.02	0	1.06
2018-08-16	22:48:00	2018-08-16 22:48:00	74.7337	-95.1361	-1.12	29.97	3.02	1436.99	0	1.05
2018-08-16	22:49:00	2018-08-16 22:49:00	74.7337	-95.1361	-1.13	29.97	3.13	1436.97	0	1.06
2018-08-16	22:50:00	2018-08-16 22:50:00	74.7337	-95.1361	-1.13	29.97	3.09	1436.93	0	1.06
2018-08-16	22:51:00	2018-08-16 22:51:00	74.7337	-95.1361	-1.14	29.97	3.06	1436.9	0.01	1.06
2018-08-16	22:52:00	2018-08-16 22:52:00	74.7337	-95.1361	-1.14	29.97	3.06	1436.88	0.02	1.06
2018-08-16	22:53:00	2018-08-16 22:53:00	74.7337	-95.1361	-1.14	29.97	2.98	1436.89	0.03	1.05
2018-08-16	22:54:00	2018-08-16 22:54:00	74.7337	-95.1361	-1.12	29.97	3.06	1436.99	0.03	1.05
2018-08-16	22:55:00	2018-08-16 22:55:00	74.7337	-95.1361	-1.1	30	3.22	1437.14	0.03	1.05
2018-08-16	22:56:00	2018-08-16 22:56:00	74.7337	-95.1361	-1.08	30.01	3.17	1437.18	0.02	1.06
2018-08-16	22:57:00	2018-08-16 22:57:00	74.7337	-95.1361	-1.09	30.03	3.2	1437.21	0	1.06
2018-08-16	22:58:00	2018-08-16 22:58:00	74.7337	-95.1361	-1.06	30.03	3.27	1437.34	0.01	1.06
2018-08-16	22:59:00	2018-08-16 22:59:00	74.7337	-95.1361	-1.06	30.05	3.34	1437.4	0.01	1.05
2018-08-16	23:00:00	2018-08-16 23:00:00	74.7337	-95.1361	-1.06	30.06	3.3	1437.38	0	1.06
2018-08-16	23:01:00	2018-08-16 23:01:00	74.7337	-95.1361	-1.05	30.06	3.3	1437.4	0	1.06
2018-08-16	23:02:00	2018-08-16 23:02:00	74.7337	-95.1361	-1.04	30.07	3.26	1437.47	0	1.05
2018-08-16	23:03:00	2018-08-16 23:03:00	74.7337	-95.1361	-1.04	30.07	3.31	1437.51	0	1.06
2018-08-16	23:04:00	2018-08-16 23:04:00	74.7337	-95.1361	-1.02	30.07	3.31	1437.57	0	1.05
2018-08-16	23:05:00	2018-08-16 23:05:00	74.7337	-95.1361	-1.02	30.08	3.35	1437.6	0	1.05
2018-08-16	23:06:00	2018-08-16 23:06:00	74.7337	-95.1361	-1.01	30.08	3.32	1437.64	0	1.06
2018-08-16	23:07:00	2018-08-16 23:07:00	74.7337	-95.1361	-1	30.08	3.36	1437.68	0	1.06
2018-08-16	23:08:00	2018-08-16 23:08:00	74.7337	-95.1361	-1.01	30.08	3.32	1437.67	0	1.06
2018-08-16	23:09:00	2018-08-16 23:09:00	74.7337	-95.1361	-1	30.07	3.18	1437.66	0	1.05
2018-08-16	23:10:00	2018-08-16 23:10:00	74.7337	-95.1361	-1	30.07	3.05	1437.68	0	1.06
2018-08-16	23:11:00	2018-08-16 23:11:00	74.7337	-95.1362	-0.99	30.07	3.02	1437.69	0	1.05
2018-08-16	23:12:00	2018-08-16 23:12:00	74.7337	-95.1361	-0.99	30.06	2.98	1437.72	0	1.06
2018-08-16	23:13:00	2018-08-16 23:13:00	74.7337	-95.1362	-0.99	30.06	2.94	1437.71	0.02	1.05
2018-08-16	23:14:00	2018-08-16 23:14:00	74.7337	-95.1362	-0.99	30.06	2.88	1437.7	0.02	1.05
2018-08-16	23:15:00	2018-08-16 23:15:00	74.7337	-95.1361	-0.99	30.05	2.83	1437.7	0	1.06
2018-08-16	23:16:00	2018-08-16 23:16:00	74.7337	-95.1362	-0.99	30.05	2.96	1437.68	0	1.05
2018-08-16	23:17:00	2018-08-16 23:17:00	74.7337	-95.1362	-0.99	30.05	2.79	1437.68	0	1.05
2018-08-16	23:18:00	2018-08-16 23:18:00	74.7337	-95.1362	-0.99	30.05	2.83	1437.68	0.01	1.06
2018-08-16	23:19:00	2018-08-16 23:19:00	74.7337	-95.1361	-0.99	30.05	2.92	1437.69	0.01	1.06
2018-08-16	23:20:00	2018-08-16 23:20:00	74.7337	-95.1361	-0.99	30.05	2.87	1437.69	0	1.06
2018-08-16	23:21:00	2018-08-16 23:21:00	74.7337	-95.1361	-0.99	30.05	2.92	1437.69	0	1.06
2018-08-16	23:22:00	2018-08-16 23:22:00	74.7337	-95.1361	-0.98	30.05	2.91	1437.73	0	1.05
2018-08-16	23:23:00	2018-08-16 23:23:00	74.7337	-95.1361	-0.98	30.05	2.93	1437.76	0	1.05
2018-08-16	23:24:00	2018-08-16 23:24:00	74.7337	-95.1361	-0.97	30.05	2.97	1437.78	0	1.05
2018-08-16	23:25:00	2018-08-16 23:25:00	74.7337	-95.1361	-0.97	30.05	3.03	1437.8	0	1.06
2018-08-16	23:26:00	2018-08-16 23:26:00	74.7337	-95.1361	-0.97	30.05	3.01	1437.8	0	1.05
2018-08-16	23:27:00	2018-08-16 23:27:00	74.7337	-95.1361	-0.97	30.05	3.02	1437.81	0	1.06
2018-08-16	23:28:00	2018-08-16 23:28:00	74.7337	-95.1361	-0.97	30.05	3.02	1437.82	0	1.05
2018-08-16	23:29:00	2018-08-16 23:29:00	74.7337	-95.1361	-0.97	30.05	3.01	1437.82	0	1.06
2018-08-16	23:30:00	2018-08-16 23:30:00	74.7337	-95.1361	-0.97	30.06	3.09	1437.82	0.01	1.05
2018-08-16	23:31:00	2018-08-16 23:31:00	74.7337	-95.1361	-0.97	30.06	3.05	1437.82	0.01	1.05
2018-08-16	23:32:00	2018-08-16 23:32:00	74.7337	-95.1361	-0.97	30.05	3.03	1437.81	0	1.06
2018-08-16	23:33:00	2018-08-16 23:33:00	74.7337	-95.1361	-0.97	30.05	3	1437.82	0	1.05
2018-08-16	23:34:00	2018-08-16 23:34:00	74.7337	-95.1361	-0.97	30.05	3.07	1437.82	0	1.06
2018-08-16	23:35:00	2018-08-16 23:35:00	74.7337	-95.1361	-0.97	30.06	3.11	1437.82	0.01	1.06
2018-08-16	23:36:00	2018-08-16 23:36:00	74.7337	-95.1361	-0.97	30.06	3.19	1437.83	0.01	1.05
2018-08-16	23:37:00	2018-08-16 23:37:00	74.7337	-95.1361	-0.97	30.06	3.24	1437.82	0	1.05
2018-08-16	23:38:00	2018-08-16 23:38:00	74.7337	-95.1361	-0.99	30.04	3.08	1437.66	0	1.06
2018-08-16	23:39:00	2018-08-16 23:39:00	74.7337	-95.1361	-1.01	30.01	2.98	1437.57	0.01	1.05
2018-08-16	23:40:00	2018-08-16 23:40:00	74.7337	-95.1361	-1.01	29.97	2.87	1437.49	0.02	1.05
2018-08-16	23:41:00	2018-08-16 23:41:00	74.7337	-95.1361	-1.01	29.94	2.82	1437.42	0.01	1.06
2018-08-16	23:42:00	2018-08-16 23:42:00	74.7337	-95.1361	-1.01	29.93	2.81	1437.41	0	1.05
2018-08-16	23:43:00	2018-08-16 23:43:00	74.7337	-95.1361	-1.01	29.9	2.73	1437.41	0	1.05
2018-08-16	23:44:00	2018-08-16 23:44:00	74.7337	-95.1361	-0.95	29.88	2.68	1437.56	0.03	1.06
2018-08-16	23:45:00	2018-08-16 23:45:00	74.7337	-95.1361	-0.9	29.86	2.64	1437.84	0.03	1.05
2018-08-16	23:46:00	2018-08-16 23:46:00	74.7337	-95.1362	-0.88	29.85	2.58	1437.88	0	1.06
2018-08-16	23:47:00	2018-08-16 23:47:00	74.7337	-95.1362	-0.91	29.83	2.59	1437.85	0	1.06
2018-08-16	23:48:00	2018-08-16 23:48:00	74.7337	-95.1362	-0.95	29.81	2.5	1437.59	0	1.05
2018-08-16	23:49:00	2018-08-16 23:49:00	74.7337	-95.1362	-0.99	29.81	2.51	1437.44	0	1.05
2018-08-16	23:50:00	2018-08-16 23:50:00	74.7337	-95.1362	-1.02	29.81	2.51	1437.26	0	1.06
2018-08-16	23:51:00	2018-08-16 23:51:00	74.7337	-95.1362	-1.04	29.81	2.42	1437.19	0	1.06
2018-08-16	23:52:00	2018-08-16 23:52:00	74.7337	-95.1362	-1.05	29.8	2.53	1437.09	0.02	1.06
2018-08-16	23:53:00	2018-08-16 23:53:00	74.7337	-95.1362	-1.06	29.79	2.49	1437.03	0.02	1.05
2018-08-16	23:54:00	2018-08-16 23:54:00	74.7337	-95.1362	-1.07	29.79	2.47	1436.99	0	1.06
2018-08-16	23:55:00	2018-08-16 23:55:00	74.7337	-95.1362	-1.07	29.81	2.42	1437.01	0	1.06
2018-08-16	23:56:00	2018-08-16 23:56:00	74.7337	-95.1362	-1.08	29.84	2.44	1437.03	0	1.06
2018-08-16	23:57:00	2018-08-16 23:57:00	74.7337	-95.1362	-1.07	29.86	2.55	1437.06	0	1.03
2018-08-16	23:58:00	2018-08-16 23:58:00	74.7337	-95.1362	-1.07	29.88	2.5	1437.1	0	1.06
2018-08-16	23:59:00	2018-08-16 23:59:00	74.7337	-95.1362	-1.06	29.9	2.58	1437.17	0.01	1.05
2018-08-17	00:00:00	2018-08-17	74.7337	-95.1362	-1.05	29.91	2.57	1437.2	0.01	1.05
2018-08-17	00:01:00	2018-08-17 00:01:00	74.7337	-95.1362	-1.05	29.91	2.62	1437.22	0	1.06
2018-08-17	00:02:00	2018-08-17 00:02:00	74.7337	-95.1362	-1.04	29.91	2.59	1437.23	0.01	1.06
2018-08-17	00:03:00	2018-08-17 00:03:00	74.7337	-95.1362	-1.05	29.9	2.52	1437.21	0.01	1.04
2018-08-17	00:04:00	2018-08-17 00:04:00	74.7337	-95.1362	-1.05	29.89	2.67	1437.18	0.01	1.05
2018-08-17	00:05:00	2018-08-17 00:05:00	74.7337	-95.1363	-1.05	29.88	2.68	1437.16	0.01	1.05
2018-08-17	00:06:00	2018-08-17 00:06:00	74.7337	-95.1363	-1.05	29.88	2.53	1437.17	0.03	1.05
2018-08-17	00:07:00	2018-08-17 00:07:00	74.7337	-95.1363	-1.05	29.87	2.54	1437.18	0.03	1.06
2018-08-17	00:08:00	2018-08-17 00:08:00	74.7337	-95.1363	-1.05	29.87	2.63	1437.18	0	1.04
2018-08-17	00:09:00	2018-08-17 00:09:00	74.7337	-95.1363	-1.04	29.87	2.6	1437.21	0	1.06
2018-08-17	00:10:00	2018-08-17 00:10:00	74.7337	-95.1363	-1.04	29.88	2.57	1437.22	0	1.05
2018-08-17	00:11:00	2018-08-17 00:11:00	74.7337	-95.1363	-1.03	29.88	2.59	1437.24	0	1.06
2018-08-17	00:12:00	2018-08-17 00:12:00	74.7337	-95.1363	-1.02	29.87	2.64	1437.29	0	1.05
2018-08-17	00:13:00	2018-08-17 00:13:00	74.7337	-95.1363	-1	29.87	2.63	1437.39	0	1.05
2018-08-17	00:14:00	2018-08-17 00:14:00	74.7337	-95.1363	-0.99	29.86	2.65	1437.44	0	1.05
2018-08-17	00:15:00	2018-08-17 00:15:00	74.7337	-95.1363	-0.99	29.85	2.65	1437.43	0	1.05
2018-08-17	00:16:00	2018-08-17 00:16:00	74.7337	-95.1363	-1.01	29.85	2.6	1437.38	0	1.05
2018-08-17	00:17:00	2018-08-17 00:17:00	74.7337	-95.1363	-1.02	29.85	2.53	1437.3	0	1.05
2018-08-17	00:18:00	2018-08-17 00:18:00	74.7337	-95.1363	-1.02	29.85	2.56	1437.29	0	1.05
2018-08-17	00:19:00	2018-08-17 00:19:00	74.7337	-95.1363	-1.02	29.85	2.54	1437.29	0	1.05
2018-08-17	00:20:00	2018-08-17 00:20:00	74.7337	-95.1363	-1.02	29.86	2.62	1437.31	0	1.05
2018-08-17	00:21:00	2018-08-17 00:21:00	74.7337	-95.1363	-1.02	29.86	2.64	1437.32	0	1.05
2018-08-17	00:22:00	2018-08-17 00:22:00	74.7337	-95.1363	-1.02	29.87	2.69	1437.3	0	1.05
2018-08-17	00:23:00	2018-08-17 00:23:00	74.7337	-95.1363	-1.03	29.88	2.66	1437.29	0	1.05
2018-08-17	00:24:00	2018-08-17 00:24:00	74.7337	-95.1363	-1.03	29.89	2.72	1437.29	0	1.05
2018-08-17	00:25:00	2018-08-17 00:25:00	74.7337	-95.1363	-1.03	29.89	2.75	1437.29	0	1.05
2018-08-17	00:26:00	2018-08-17 00:26:00	74.7337	-95.1363	-1.02	29.89	2.73	1437.31	0	1.05
2018-08-17	00:27:00	2018-08-17 00:27:00	74.7337	-95.1363	-1.02	29.89	2.73	1437.34	0	1.05
2018-08-17	00:28:00	2018-08-17 00:28:00	74.7337	-95.1363	-1.01	29.88	2.72	1437.36	0	1.05
2018-08-17	00:29:00	2018-08-17 00:29:00	74.7337	-95.1363	-1.01	29.89	2.78	1437.38	0	1.05
2018-08-17	00:30:00	2018-08-17 00:30:00	74.7337	-95.1363	-1.01	29.89	2.78	1437.38	0.01	1.05
2018-08-17	00:31:00	2018-08-17 00:31:00	74.7337	-95.1363	-1.01	29.89	2.8	1437.37	0.01	1.05
2018-08-17	00:32:00	2018-08-17 00:32:00	74.7337	-95.1363	-1.02	29.89	2.82	1437.36	0	1.05
2018-08-17	00:33:00	2018-08-17 00:33:00	74.7337	-95.1363	-1.02	29.9	2.82	1437.36	0	1.05
2018-08-17	00:34:00	2018-08-17 00:34:00	74.7337	-95.1363	-1.02	29.9	2.88	1437.35	0	1.05
2018-08-17	00:35:00	2018-08-17 00:35:00	74.7337	-95.1363	-1.02	29.9	2.89	1437.34	0	1.05
2018-08-17	00:36:00	2018-08-17 00:36:00	74.7337	-95.1363	-1.03	29.9	2.9	1437.33	0	1.05
2018-08-17	00:37:00	2018-08-17 00:37:00	74.7337	-95.1363	-1.02	29.91	2.93	1437.34	0	1.05
2018-08-17	00:38:00	2018-08-17 00:38:00	74.7337	-95.1363	-1.01	29.9	2.91	1437.37	0.02	1.05
2018-08-17	00:39:00	2018-08-17 00:39:00	74.7337	-95.1363	-1.01	29.9	2.94	1437.39	0.02	1.05
2018-08-17	00:40:00	2018-08-17 00:40:00	74.7337	-95.1363	-1.01	29.89	2.85	1437.41	0	1.05
2018-08-17	00:41:00	2018-08-17 00:41:00	74.7337	-95.1363	-1.01	29.89	2.82	1437.41	0	1.05
2018-08-17	00:42:00	2018-08-17 00:42:00	74.7337	-95.1363	-1.01	29.89	2.84	1437.41	0	1.05
2018-08-17	00:43:00	2018-08-17 00:43:00	74.7337	-95.1363	-1.01	29.89	2.79	1437.39	0	1.05
2018-08-17	00:44:00	2018-08-17 00:44:00	74.7337	-95.1363	-1.01	29.89	2.8	1437.4	0	1.05
2018-08-17	00:45:00	2018-08-17 00:45:00	74.7337	-95.1363	-1	29.89	2.84	1437.41	0	1.04
2018-08-17	00:46:00	2018-08-17 00:46:00	74.7337	-95.1363	-0.99	29.88	2.77	1437.44	0	1.05
2018-08-17	00:47:00	2018-08-17 00:47:00	74.7337	-95.1363	-0.98	29.87	2.74	1437.48	0	1.05
2018-08-17	00:48:00	2018-08-17 00:48:00	74.7337	-95.1363	-0.98	29.86	2.7	1437.49	0.02	1.05
2018-08-17	00:49:00	2018-08-17 00:49:00	74.7337	-95.1363	-0.98	29.86	2.8	1437.49	0.02	1.05
2018-08-17	00:50:00	2018-08-17 00:50:00	74.7337	-95.1363	-0.98	29.86	2.71	1437.5	0	1.05
2018-08-17	00:51:00	2018-08-17 00:51:00	74.7337	-95.1363	-0.98	29.86	2.83	1437.51	0	1.05
2018-08-17	00:52:00	2018-08-17 00:52:00	74.7337	-95.1363	-0.98	29.87	2.8	1437.51	0	1.05
2018-08-17	00:53:00	2018-08-17 00:53:00	74.7337	-95.1363	-0.98	29.87	2.82	1437.5	0	1.05
2018-08-17	00:54:00	2018-08-17 00:54:00	74.7337	-95.1363	-0.98	29.88	2.82	1437.5	0	1.05
2018-08-17	00:55:00	2018-08-17 00:55:00	74.7337	-95.1363	-0.99	29.89	2.75	1437.5	0	1.05
2018-08-17	00:56:00	2018-08-17 00:56:00	74.7337	-95.1363	-0.99	29.89	2.75	1437.49	0.01	1.05
2018-08-17	00:57:00	2018-08-17 00:57:00	74.7337	-95.1363	-0.99	29.89	2.81	1437.48	0.02	1.05
2018-08-17	00:58:00	2018-08-17 00:58:00	74.7337	-95.1363	-1	29.88	2.77	1437.45	0.01	1.05
2018-08-17	00:59:00	2018-08-17 00:59:00	74.7337	-95.1363	-1	29.88	2.71	1437.43	0	1.05
2018-08-17	01:00:00	2018-08-17 01:00:00	74.7337	-95.1363	-1	29.89	2.72	1437.42	0	1.05
2018-08-17	01:01:00	2018-08-17 01:01:00	74.7337	-95.1363	-1	29.88	2.81	1437.42	0	1.05
2018-08-17	01:02:00	2018-08-17 01:02:00	74.7337	-95.1363	-1	29.88	2.71	1437.43	0	1.05
2018-08-17	01:03:00	2018-08-17 01:03:00	74.7337	-95.1363	-1	29.89	2.72	1437.42	0	1.05
2018-08-17	01:04:00	2018-08-17 01:04:00	74.7337	-95.1363	-1.01	29.9	2.73	1437.4	0.02	1.05
2018-08-17	01:05:00	2018-08-17 01:05:00	74.7337	-95.1363	-1.02	29.9	2.69	1437.39	0.03	1.05
2018-08-17	01:06:00	2018-08-17 01:06:00	74.7337	-95.1363	-1.02	29.91	2.73	1437.38	0.02	1.05
2018-08-17	01:07:00	2018-08-17 01:07:00	74.7337	-95.1363	-1.01	29.91	2.76	1437.38	0.01	1.05
2018-08-17	01:08:00	2018-08-17 01:08:00	74.7337	-95.1363	-1.01	29.9	2.76	1437.39	0	1.05
2018-08-17	01:09:00	2018-08-17 01:09:00	74.7337	-95.1363	-1.02	29.9	2.76	1437.38	0	1.05
2018-08-17	01:10:00	2018-08-17 01:10:00	74.7337	-95.1363	-1.02	29.91	2.77	1437.37	0.01	1.05
2018-08-17	01:11:00	2018-08-17 01:11:00	74.7337	-95.1363	-1.02	29.91	2.79	1437.38	0.01	1.05
2018-08-17	01:12:00	2018-08-17 01:12:00	74.7337	-95.1363	-1.01	29.91	2.85	1437.4	0.01	1.05
2018-08-17	01:13:00	2018-08-17 01:13:00	74.7337	-95.1363	-1.01	29.9	2.95	1437.41	0.01	1.05
2018-08-17	01:14:00	2018-08-17 01:14:00	74.7337	-95.1363	-1.01	29.9	2.87	1437.42	0	1.05
2018-08-17	01:15:00	2018-08-17 01:15:00	74.7337	-95.1363	-1.01	29.91	2.77	1437.41	0	1.05
2018-08-17	01:16:00	2018-08-17 01:16:00	74.7337	-95.1363	-1.02	29.91	2.84	1437.4	0	1.05
2018-08-17	01:17:00	2018-08-17 01:17:00	74.7337	-95.1363	-1.02	29.92	2.85	1437.38	0	1.05
2018-08-17	01:18:00	2018-08-17 01:18:00	74.7337	-95.1363	-1.03	29.92	2.8	1437.37	0	1.05
2018-08-17	01:19:00	2018-08-17 01:19:00	74.7337	-95.1363	-1.03	29.93	2.89	1437.36	0	1.05
2018-08-17	01:20:00	2018-08-17 01:20:00	74.7337	-95.1363	-1.04	29.93	2.97	1437.32	0	1.04
2018-08-17	01:21:00	2018-08-17 01:21:00	74.7337	-95.1363	-1.04	29.94	3.02	1437.3	0	1.05
2018-08-17	01:22:00	2018-08-17 01:22:00	74.7337	-95.1363	-1.04	29.94	3.01	1437.29	0	1.05
2018-08-17	01:23:00	2018-08-17 01:23:00	74.7337	-95.1363	-1.04	29.94	3	1437.29	0	1.05
2018-08-17	01:24:00	2018-08-17 01:24:00	74.7337	-95.1363	-1.04	29.94	2.97	1437.29	0	1.05
2018-08-17	01:25:00	2018-08-17 01:25:00	74.7337	-95.1363	-1.04	29.94	2.93	1437.29	0	1.05
2018-08-17	01:26:00	2018-08-17 01:26:00	74.7337	-95.1363	-1.04	29.94	2.95	1437.29	0	1.05
2018-08-17	01:27:00	2018-08-17 01:27:00	74.7337	-95.1363	-1.04	29.94	2.99	1437.29	0	1.05
2018-08-17	01:28:00	2018-08-17 01:28:00	74.7337	-95.1363	-1.03	29.94	3.05	1437.34	0.02	1.05
2018-08-17	01:29:00	2018-08-17 01:29:00	74.7337	-95.1363	-1.02	29.94	2.99	1437.38	0.04	1.05
2018-08-17	01:30:00	2018-08-17 01:30:00	74.7337	-95.1364	-1.01	29.93	2.94	1437.42	0.03	1.05
2018-08-17	01:31:00	2018-08-17 01:31:00	74.7337	-95.1364	-1.01	29.93	2.96	1437.44	0	1.05
2018-08-17	01:32:00	2018-08-17 01:32:00	74.7337	-95.1364	-1.01	29.93	3.06	1437.45	0	1.05
2018-08-17	01:33:00	2018-08-17 01:33:00	74.7337	-95.1364	-1.01	29.93	3	1437.47	0	1.05
2018-08-17	01:34:00	2018-08-17 01:34:00	74.7337	-95.1364	-1.01	29.94	2.95	1437.48	0.01	1.05
2018-08-17	01:35:00	2018-08-17 01:35:00	74.7337	-95.1364	-1.01	29.95	2.99	1437.49	0.01	1.05
2018-08-17	01:36:00	2018-08-17 01:36:00	74.7337	-95.1364	-1.01	29.95	3.13	1437.5	0	1.06
2018-08-17	01:37:00	2018-08-17 01:37:00	74.7337	-95.1364	-1.01	29.96	3.11	1437.5	0	1.05
2018-08-17	01:38:00	2018-08-17 01:38:00	74.7337	-95.1364	-1.01	29.96	3.17	1437.5	0	1.05
2018-08-17	01:39:00	2018-08-17 01:39:00	74.7337	-95.1364	-1.01	29.97	3.21	1437.51	0	1.04
2018-08-17	01:40:00	2018-08-17 01:40:00	74.7337	-95.1364	-1	29.97	3.15	1437.52	0	1.05
2018-08-17	01:41:00	2018-08-17 01:41:00	74.7337	-95.1364	-1	29.97	3.17	1437.55	0	1.03
2018-08-17	01:42:00	2018-08-17 01:42:00	74.7337	-95.1364	-1	29.98	3.24	1437.55	0	1.03
2018-08-17	01:43:00	2018-08-17 01:43:00	74.7337	-95.1363	-1	29.98	3.09	1437.57	0	1.03
2018-08-17	01:44:00	2018-08-17 01:44:00	74.7337	-95.1364	-1	29.99	3.15	1437.58	0	1.02
2018-08-17	01:45:00	2018-08-17 01:45:00	74.7337	-95.1363	-0.99	29.99	3.14	1437.62	0	1.04
2018-08-17	01:46:00	2018-08-17 01:46:00	74.7337	-95.1363	-0.98	30	3.29	1437.66	0	1.05
2018-08-17	01:47:00	2018-08-17 01:47:00	74.7337	-95.1363	-0.98	30.01	3.26	1437.69	0	1.05
2018-08-17	01:48:00	2018-08-17 01:48:00	74.7337	-95.1364	-0.98	30.01	3.29	1437.68	0	1.05
2018-08-17	01:49:00	2018-08-17 01:49:00	74.7337	-95.1363	-0.99	30.01	3.25	1437.64	0	1.05
2018-08-17	01:50:00	2018-08-17 01:50:00	74.7337	-95.1363	-1	30	3.31	1437.6	0	1.05
2018-08-17	01:51:00	2018-08-17 01:51:00	74.7337	-95.1363	-1	29.99	3.28	1437.58	0	1.02
2018-08-17	01:52:00	2018-08-17 01:52:00	74.7337	-95.1364	-1	29.98	3.18	1437.56	0	1.02
2018-08-17	01:53:00	2018-08-17 01:53:00	74.7337	-95.1363	-1	29.98	3.21	1437.55	0	1.02
2018-08-17	01:54:00	2018-08-17 01:54:00	74.7337	-95.1363	-1.01	29.97	3.23	1437.53	0	1.02
2018-08-17	01:55:00	2018-08-17 01:55:00	74.7337	-95.1363	-1.01	29.97	3.21	1437.51	0	1.02
2018-08-17	01:56:00	2018-08-17 01:56:00	74.7337	-95.1363	-1.01	29.97	3.18	1437.47	0	1.02
2018-08-17	01:57:00	2018-08-17 01:57:00	74.7337	-95.1363	-1.01	29.94	3.11	1437.41	0	1
2018-08-17	01:58:00	2018-08-17 01:58:00	74.7337	-95.1363	-1.02	29.91	3.1	1437.39	0.01	1.02
2018-08-17	01:59:00	2018-08-17 01:59:00	74.7337	-95.1363	-1.01	29.91	3.09	1437.42	0.01	1.01
2018-08-17	02:00:00	2018-08-17 02:00:00	74.7337	-95.1363	-0.99	29.94	3.25	1437.5	0	1.02
2018-08-17	02:01:00	2018-08-17 02:01:00	74.7337	-95.1363	-0.98	29.97	3.18	1437.65	0	1.02
2018-08-17	02:02:00	2018-08-17 02:02:00	74.7337	-95.1363	-0.98	29.99	3.29	1437.67	0	1.02
2018-08-17	02:03:00	2018-08-17 02:03:00	74.7337	-95.1363	-0.99	29.99	3.32	1437.62	0	1.02
2018-08-17	02:04:00	2018-08-17 02:04:00	74.7337	-95.1363	-1.01	29.98	3.18	1437.53	0	1.02
2018-08-17	02:05:00	2018-08-17 02:05:00	74.7337	-95.1363	-1.02	29.97	3.25	1437.46	0.01	1.02
2018-08-17	02:06:00	2018-08-17 02:06:00	74.7337	-95.1363	-1.02	29.96	3.22	1437.42	0.01	1.02
2018-08-17	02:07:00	2018-08-17 02:07:00	74.7337	-95.1363	-1.04	29.94	3.15	1437.33	0	1.02
2018-08-17	02:08:00	2018-08-17 02:08:00	74.7337	-95.1363	-1.05	29.92	3.13	1437.23	0	1.02
2018-08-17	02:09:00	2018-08-17 02:09:00	74.7337	-95.1363	-1.05	29.89	3.07	1437.2	0	1.02
2018-08-17	02:10:00	2018-08-17 02:10:00	74.7337	-95.1363	-1.04	29.9	3.15	1437.28	0	1.02
2018-08-17	02:11:00	2018-08-17 02:11:00	74.7337	-95.1363	-1.03	29.92	3.15	1437.31	0.01	1.02
2018-08-17	02:12:00	2018-08-17 02:12:00	74.7337	-95.1363	-1.01	29.93	3.08	1437.39	0.03	1.02
2018-08-17	02:13:00	2018-08-17 02:13:00	74.7337	-95.1363	-0.99	29.95	3.16	1437.54	0.03	1.02
2018-08-17	02:14:00	2018-08-17 02:14:00	74.7337	-95.1363	-0.98	29.97	3.24	1437.62	0	1.01
2018-08-17	02:15:00	2018-08-17 02:15:00	74.7337	-95.1363	-0.97	29.98	3.27	1437.69	0	1.02
2018-08-17	02:16:00	2018-08-17 02:16:00	74.7337	-95.1363	-0.96	30	3.31	1437.77	0.01	1.02
2018-08-17	02:17:00	2018-08-17 02:17:00	74.7337	-95.1363	-0.97	30.01	3.22	1437.76	0.01	1.02
2018-08-17	02:18:00	2018-08-17 02:18:00	74.7337	-95.1363	-0.98	30	3.25	1437.69	0	1.02
2018-08-17	02:19:00	2018-08-17 02:19:00	74.7337	-95.1363	-0.98	30	3.26	1437.66	0	1.01
2018-08-17	02:20:00	2018-08-17 02:20:00	74.7337	-95.1363	-0.97	30	3.32	1437.69	0	1.02
2018-08-17	02:21:00	2018-08-17 02:21:00	74.7337	-95.1363	-0.96	30.01	3.32	1437.77	0	1.02
2018-08-17	02:22:00	2018-08-17 02:22:00	74.7337	-95.1363	-0.96	30.02	3.4	1437.81	0	1.02
2018-08-17	02:23:00	2018-08-17 02:23:00	74.7337	-95.1363	-0.96	30.03	3.32	1437.81	0	1.02
2018-08-17	02:24:00	2018-08-17 02:24:00	74.7337	-95.1363	-0.98	30.03	3.31	1437.7	0	1.01
2018-08-17	02:25:00	2018-08-17 02:25:00	74.7337	-95.1363	-0.99	30	3.33	1437.63	0	1.02
2018-08-17	02:26:00	2018-08-17 02:26:00	74.7337	-95.1363	-0.99	29.98	3.29	1437.58	0	1.02
2018-08-17	02:27:00	2018-08-17 02:27:00	74.7337	-95.1363	-0.99	29.98	3.18	1437.6	0	1.02
2018-08-17	02:28:00	2018-08-17 02:28:00	74.7337	-95.1363	-0.99	29.98	3.31	1437.59	0	1.02
2018-08-17	02:29:00	2018-08-17 02:29:00	74.7337	-95.1363	-1	29.98	3.36	1437.56	0	1.02
2018-08-17	02:30:00	2018-08-17 02:30:00	74.7337	-95.1363	-1	29.98	3.35	1437.56	0	1.02
2018-08-17	02:31:00	2018-08-17 02:31:00	74.7337	-95.1363	-1	29.99	3.21	1437.58	0	1.01
2018-08-17	02:32:00	2018-08-17 02:32:00	74.7337	-95.1363	-0.99	30	3.37	1437.62	0	1.01
2018-08-17	02:33:00	2018-08-17 02:33:00	74.7337	-95.1363	-0.98	30.02	3.38	1437.69	0	1.02
2018-08-17	02:34:00	2018-08-17 02:34:00	74.7337	-95.1364	-0.97	30.03	3.37	1437.78	0	1.02
2018-08-17	02:35:00	2018-08-17 02:35:00	74.7337	-95.1364	-0.96	30.04	3.37	1437.82	0.09	1.02
2018-08-17	02:36:00	2018-08-17 02:36:00	74.7337	-95.1362	-0.96	30.04	3.49	1437.83	0.25	1.02
2018-08-17	02:37:00	2018-08-17 02:37:00	74.7336	-95.1359	-0.99	30.03	3.41	1437.67	0.24	1.02
2018-08-17	02:38:00	2018-08-17 02:38:00	74.7336	-95.136	-1	30.01	3.3	1437.58	0.18	1.02
2018-08-17	02:39:00	2018-08-17 02:39:00	74.7337	-95.1362	-1.01	30	3.37	1437.57	0.19	1.03
2018-08-17	02:40:00	2018-08-17 02:40:00	74.7337	-95.1364	-1	30.01	3.27	1437.61	0.19	1.02
2018-08-17	02:41:00	2018-08-17 02:41:00	74.7337	-95.1365	-0.97	30.02	3.38	1437.7	0.16	1.02
2018-08-17	02:42:00	2018-08-17 02:42:00	74.7337	-95.1366	-0.95	30.04	3.36	1437.86	0.11	1.02
2018-08-17	02:43:00	2018-08-17 02:43:00	74.7337	-95.1367	-0.93	30.05	3.44	1437.98	0.09	1.02
2018-08-17	02:44:00	2018-08-17 02:44:00	74.7337	-95.1366	-0.92	30.06	3.42	1438.06	0.09	1.02
2018-08-17	02:45:00	2018-08-17 02:45:00	74.7337	-95.1365	-0.93	30.06	3.38	1437.99	0.06	1.02
2018-08-17	02:46:00	2018-08-17 02:46:00	74.7337	-95.1365	-0.94	30.04	3.46	1437.92	0.05	1.03
2018-08-17	02:47:00	2018-08-17 02:47:00	74.7337	-95.1365	-0.96	30.03	3.33	1437.84	0.07	1.02
2018-08-17	02:48:00	2018-08-17 02:48:00	74.7337	-95.1366	-0.97	30.02	3.35	1437.79	0.06	1.02
2018-08-17	02:49:00	2018-08-17 02:49:00	74.7337	-95.1366	-0.97	30.02	3.4	1437.77	0.02	1.03
2018-08-17	02:50:00	2018-08-17 02:50:00	74.7337	-95.1366	-0.97	30.03	3.35	1437.76	0.02	1.02
2018-08-17	02:51:00	2018-08-17 02:51:00	74.7337	-95.1367	-0.98	30.03	3.42	1437.75	0.02	1.03
2018-08-17	02:52:00	2018-08-17 02:52:00	74.7337	-95.1367	-0.99	30.03	3.36	1437.7	0	1.02
2018-08-17	02:53:00	2018-08-17 02:53:00	74.7337	-95.1367	-0.99	30.03	3.41	1437.68	0	1.02
2018-08-17	02:54:00	2018-08-17 02:54:00	74.7337	-95.1367	-0.99	30.03	3.32	1437.68	0	1.02
2018-08-17	02:55:00	2018-08-17 02:55:00	74.7337	-95.1367	-0.98	30.03	3.41	1437.69	0	1.02
2018-08-17	02:56:00	2018-08-17 02:56:00	74.7337	-95.1367	-0.98	30.03	3.35	1437.71	0	1.03
2018-08-17	02:57:00	2018-08-17 02:57:00	74.7337	-95.1367	-0.98	30.03	3.39	1437.7	0	1.02
2018-08-17	02:58:00	2018-08-17 02:58:00	74.7337	-95.1367	-0.98	30.03	3.42	1437.69	0	1.02
2018-08-17	02:59:00	2018-08-17 02:59:00	74.7337	-95.1367	-0.99	30.03	3.48	1437.68	0	1.02
2018-08-17	03:00:00	2018-08-17 03:00:00	74.7336	-95.1367	-0.99	30.02	3.39	1437.64	0.01	1.03
2018-08-17	03:01:00	2018-08-17 03:01:00	74.7336	-95.1367	-1	30.01	3.41	1437.59	0.01	1.02
2018-08-17	03:02:00	2018-08-17 03:02:00	74.7336	-95.1367	-1	30	3.31	1437.59	0	1.02
2018-08-17	03:03:00	2018-08-17 03:03:00	74.7336	-95.1367	-1.01	29.99	3.39	1437.56	0	1.02
2018-08-17	03:04:00	2018-08-17 03:04:00	74.7336	-95.1367	-1.01	29.98	3.22	1437.51	0.06	1.02
2018-08-17	03:05:00	2018-08-17 03:05:00	74.7336	-95.1366	-1.02	29.96	3.23	1437.46	0.11	1.03
2018-08-17	03:06:00	2018-08-17 03:06:00	74.7336	-95.1365	-1.02	29.95	3.29	1437.44	0.05	1.02
2018-08-17	03:07:00	2018-08-17 03:07:00	74.7336	-95.1364	-1.01	29.95	3.28	1437.44	0.02	1.01
2018-08-17	03:08:00	2018-08-17 03:08:00	74.7336	-95.1365	-1.01	29.96	3.42	1437.49	0.04	1.03
2018-08-17	03:09:00	2018-08-17 03:09:00	74.7336	-95.1365	-1	29.97	3.42	1437.53	0.03	1.02
2018-08-17	03:10:00	2018-08-17 03:10:00	74.7336	-95.1365	-1	29.98	3.35	1437.56	0.05	1.02
2018-08-17	03:11:00	2018-08-17 03:11:00	74.7336	-95.1366	-1	29.98	3.41	1437.57	0.04	1.03
2018-08-17	03:12:00	2018-08-17 03:12:00	74.7336	-95.1366	-0.99	29.99	3.36	1437.59	0.04	1.03
2018-08-17	03:13:00	2018-08-17 03:13:00	74.7336	-95.1366	-0.99	29.98	3.34	1437.6	0.05	1.03
2018-08-17	03:14:00	2018-08-17 03:14:00	74.7336	-95.1366	-0.99	29.98	3.35	1437.6	0.03	1.02
2018-08-17	03:15:00	2018-08-17 03:15:00	74.7336	-95.1367	-0.99	29.98	3.4	1437.59	0.03	1.03
2018-08-17	03:16:00	2018-08-17 03:16:00	74.7336	-95.1367	-1	29.98	3.27	1437.57	0.06	1.03
2018-08-17	03:17:00	2018-08-17 03:17:00	74.7336	-95.1367	-1	29.97	3.39	1437.56	0.07	1.02
2018-08-17	03:18:00	2018-08-17 03:18:00	74.7336	-95.1367	-1	29.97	3.33	1437.54	0.02	1.02
2018-08-17	03:19:00	2018-08-17 03:19:00	74.7336	-95.1368	-1.01	29.96	3.35	1437.51	0	1.02
2018-08-17	03:20:00	2018-08-17 03:20:00	74.7336	-95.1368	-1.01	29.96	3.34	1437.49	0	1.02
2018-08-17	03:21:00	2018-08-17 03:21:00	74.7336	-95.1368	-1.01	29.95	3.39	1437.48	0	1.02
2018-08-17	03:22:00	2018-08-17 03:22:00	74.7336	-95.1368	-1.01	29.95	3.3	1437.47	0	1.02
2018-08-17	03:23:00	2018-08-17 03:23:00	74.7336	-95.1368	-1.01	29.95	3.28	1437.45	0.02	1.02
2018-08-17	03:24:00	2018-08-17 03:24:00	74.7336	-95.1368	-1.01	29.94	3.21	1437.45	0.04	1.02
2018-08-17	03:25:00	2018-08-17 03:25:00	74.7336	-95.1368	-1.01	29.94	3.32	1437.46	0.04	1.02
2018-08-17	03:26:00	2018-08-17 03:26:00	74.7336	-95.1369	-1.01	29.94	3.3	1437.45	0.03	1.02
2018-08-17	03:27:00	2018-08-17 03:27:00	74.7336	-95.1369	-1.01	29.93	3.3	1437.43	0.02	1.02
2018-08-17	03:28:00	2018-08-17 03:28:00	74.7335	-95.1369	-1.02	29.93	3.35	1437.42	0.03	1.02
2018-08-17	03:29:00	2018-08-17 03:29:00	74.7335	-95.1369	-1.02	29.93	3.24	1437.41	0.04	1.03
2018-08-17	03:30:00	2018-08-17 03:30:00	74.7335	-95.1369	-1.01	29.92	3.26	1437.42	0.03	1
2018-08-17	03:31:00	2018-08-17 03:31:00	74.7335	-95.1369	-1.01	29.92	3.24	1437.42	0.04	1.03
2018-08-17	03:32:00	2018-08-17 03:32:00	74.7335	-95.137	-1.01	29.92	3.24	1437.42	0.03	1.02
2018-08-17	03:33:00	2018-08-17 03:33:00	74.7335	-95.137	-1	29.91	3.27	1437.43	0	1.02
2018-08-17	03:34:00	2018-08-17 03:34:00	74.7335	-95.137	-1	29.91	3.37	1437.46	0.01	1.02
2018-08-17	03:35:00	2018-08-17 03:35:00	74.7335	-95.137	-0.98	29.9	3.3	1437.55	0.01	1.03
2018-08-17	03:36:00	2018-08-17 03:36:00	74.7335	-95.1371	-0.98	29.9	3.24	1437.57	0	1.02
2018-08-17	03:37:00	2018-08-17 03:37:00	74.7335	-95.1371	-0.95	29.91	3.15	1437.59	0.01	1.02
2018-08-17	03:38:00	2018-08-17 03:38:00	74.7335	-95.137	-0.96	29.91	3.23	1437.69	0.08	1.02
2018-08-17	03:39:00	2018-08-17 03:39:00	74.7335	-95.1369	-0.97	29.91	3.36	1437.62	0.18	1.02
2018-08-17	03:40:00	2018-08-17 03:40:00	74.7334	-95.1367	-0.98	29.91	3.34	1437.6	0.23	1.02
2018-08-17	03:41:00	2018-08-17 03:41:00	74.7334	-95.1365	-0.99	29.91	3.35	1437.5	0.15	1.02
2018-08-17	03:42:00	2018-08-17 03:42:00	74.7334	-95.1366	-1	29.91	3.36	1437.48	0.12	1.02
2018-08-17	03:43:00	2018-08-17 03:43:00	74.7334	-95.1367	-0.97	29.91	3.3	1437.52	0.18	1.02
2018-08-17	03:44:00	2018-08-17 03:44:00	74.7335	-95.1368	-0.93	29.91	3.27	1437.78	0.22	1.02
2018-08-17	03:45:00	2018-08-17 03:45:00	74.7335	-95.137	-0.83	29.91	3.32	1438.24	0.21	1.02
2018-08-17	03:46:00	2018-08-17 03:46:00	74.7335	-95.1372	-0.8	29.91	3.28	1438.39	0.13	1.02
2018-08-17	03:47:00	2018-08-17 03:47:00	74.7335	-95.1372	-0.82	29.91	3.26	1438.35	0.08	1.02
2018-08-17	03:48:00	2018-08-17 03:48:00	74.7335	-95.1372	-0.84	29.91	3.23	1438.37	0.05	1.03
2018-08-17	03:49:00	2018-08-17 03:49:00	74.7335	-95.1372	-0.87	29.91	3.3	1438.09	0.04	1.02
2018-08-17	03:50:00	2018-08-17 03:50:00	74.7335	-95.1372	-0.91	29.91	3.19	1437.97	0.03	1.02
2018-08-17	03:51:00	2018-08-17 03:51:00	74.7335	-95.1372	-0.94	29.91	3.3	1437.8	0	1.02
2018-08-17	03:52:00	2018-08-17 03:52:00	74.7335	-95.1372	-0.97	29.91	3.35	1437.67	0.02	1.02
2018-08-17	03:53:00	2018-08-17 03:53:00	74.7335	-95.1372	-0.97	29.91	3.27	1437.62	0.03	1.02
2018-08-17	03:54:00	2018-08-17 03:54:00	74.7335	-95.1372	-0.98	29.91	3.32	1437.59	0.01	1.02
2018-08-17	03:55:00	2018-08-17 03:55:00	74.7335	-95.1372	-0.99	29.92	3.31	1437.56	0	1.02
2018-08-17	03:56:00	2018-08-17 03:56:00	74.7335	-95.1372	-1	29.94	3.3	1437.55	0	1.02
2018-08-17	03:57:00	2018-08-17 03:57:00	74.7335	-95.1372	-1.01	29.95	3.36	1437.52	0	1.02
2018-08-17	03:58:00	2018-08-17 03:58:00	74.7335	-95.1372	-1	29.97	3.35	1437.54	0.02	1.02
2018-08-17	03:59:00	2018-08-17 03:59:00	74.7335	-95.1372	-1	29.98	3.36	1437.57	0.05	1.02
2018-08-17	04:00:00	2018-08-17 04:00:00	74.7335	-95.1372	-1.01	29.98	3.38	1437.56	0.03	1.03
2018-08-17	04:01:00	2018-08-17 04:01:00	74.7335	-95.1372	-1.01	29.99	3.43	1437.55	0.01	1
2018-08-17	04:02:00	2018-08-17 04:02:00	74.7335	-95.1372	-1.01	30	3.48	1437.54	0.04	1.03
2018-08-17	04:03:00	2018-08-17 04:03:00	74.7335	-95.1372	-1	30	3.39	1437.61	0.04	1.02
2018-08-17	04:04:00	2018-08-17 04:04:00	74.7335	-95.1372	-1	30	3.53	1437.6	0.06	1.02
2018-08-17	04:05:00	2018-08-17 04:05:00	74.7335	-95.1372	-1	30	3.4	1437.6	0.04	1.02
2018-08-17	04:06:00	2018-08-17 04:06:00	74.7335	-95.1372	-1	30.01	3.47	1437.58	0.02	1.02
2018-08-17	04:07:00	2018-08-17 04:07:00	74.7335	-95.1372	-1.01	30.01	3.45	1437.57	0.03	1.02
2018-08-17	04:08:00	2018-08-17 04:08:00	74.7335	-95.1372	-1.01	30.01	3.5	1437.57	0.06	1.02
2018-08-17	04:09:00	2018-08-17 04:09:00	74.7335	-95.1372	-1.01	30.01	3.36	1437.56	0.07	1.02
2018-08-17	04:10:00	2018-08-17 04:10:00	74.7335	-95.1372	-1.01	30.01	3.43	1437.56	0.03	1.02
2018-08-17	04:11:00	2018-08-17 04:11:00	74.7335	-95.1372	-0.99	30.01	3.42	1437.62	0	1.02
2018-08-17	04:12:00	2018-08-17 04:12:00	74.7335	-95.1372	-0.99	30.01	3.48	1437.63	0	1.02
2018-08-17	04:13:00	2018-08-17 04:13:00	74.7336	-95.1372	-1	30.01	3.39	1437.62	0.01	1.02
2018-08-17	04:14:00	2018-08-17 04:14:00	74.7336	-95.1373	-1	30.01	3.47	1437.6	0.01	1.02
2018-08-17	04:15:00	2018-08-17 04:15:00	74.7336	-95.1373	-1	30.01	3.43	1437.59	0	1.02
2018-08-17	04:16:00	2018-08-17 04:16:00	74.7336	-95.1373	-1	30.01	3.41	1437.6	0.03	1.02
2018-08-17	04:17:00	2018-08-17 04:17:00	74.7336	-95.1373	-0.99	30.01	3.47	1437.62	0.03	1.02
2018-08-17	04:18:00	2018-08-17 04:18:00	74.7336	-95.1373	-0.99	30.01	3.43	1437.62	0	1.02
2018-08-17	04:19:00	2018-08-17 04:19:00	74.7336	-95.1373	-0.99	30.01	3.34	1437.63	0.01	1.02
2018-08-17	04:20:00	2018-08-17 04:20:00	74.7336	-95.1373	-0.99	30.01	3.4	1437.62	0.01	1.02
2018-08-17	04:21:00	2018-08-17 04:21:00	74.7336	-95.1373	-0.98	30.01	3.48	1437.67	0	1.03
2018-08-17	04:22:00	2018-08-17 04:22:00	74.7336	-95.1373	-0.97	30	3.38	1437.71	0.03	1.03
2018-08-17	04:23:00	2018-08-17 04:23:00	74.7336	-95.1373	-0.97	30	3.43	1437.69	0.03	1.02
2018-08-17	04:24:00	2018-08-17 04:24:00	74.7336	-95.1374	-0.97	30	3.42	1437.72	0	1.02
2018-08-17	04:25:00	2018-08-17 04:25:00	74.7336	-95.1374	-0.95	29.99	3.4	1437.8	0	1.02
2018-08-17	04:26:00	2018-08-17 04:26:00	74.7336	-95.1374	-0.95	29.99	3.33	1437.8	0	1.02
2018-08-17	04:27:00	2018-08-17 04:27:00	74.7336	-95.1374	-0.94	29.99	3.34	1437.85	0.05	1.02
2018-08-17	04:28:00	2018-08-17 04:28:00	74.7335	-95.1373	-0.94	29.98	3.4	1437.85	0.07	1.02
2018-08-17	04:29:00	2018-08-17 04:29:00	74.7335	-95.1373	-0.93	29.98	3.4	1437.89	0.04	1.03
2018-08-17	04:30:00	2018-08-17 04:30:00	74.7335	-95.1373	-0.94	29.98	3.34	1437.85	0.04	1.02
2018-08-17	04:31:00	2018-08-17 04:31:00	74.7335	-95.1373	-0.94	29.97	3.18	1437.82	0.03	1.02
2018-08-17	04:32:00	2018-08-17 04:32:00	74.7335	-95.1373	-0.95	29.97	3.31	1437.8	0	1.03
2018-08-17	04:33:00	2018-08-17 04:33:00	74.7335	-95.1373	-0.95	29.97	3.37	1437.78	0	1.02
2018-08-17	04:34:00	2018-08-17 04:34:00	74.7335	-95.1373	-0.95	29.97	3.34	1437.79	0	1.02
2018-08-17	04:35:00	2018-08-17 04:35:00	74.7335	-95.1373	-0.95	29.96	3.31	1437.78	0	1.02
2018-08-17	04:36:00	2018-08-17 04:36:00	74.7335	-95.1373	-0.94	29.96	3.33	1437.83	0	1.02
2018-08-17	04:37:00	2018-08-17 04:37:00	74.7335	-95.1373	-0.95	29.96	3.21	1437.78	0	1.02
2018-08-17	04:38:00	2018-08-17 04:38:00	74.7335	-95.1373	-0.95	29.96	3.26	1437.77	0	1.02
2018-08-17	04:39:00	2018-08-17 04:39:00	74.7335	-95.1373	-0.94	29.96	3.28	1437.84	0	1.02
2018-08-17	04:40:00	2018-08-17 04:40:00	74.7335	-95.1373	-0.94	29.96	3.26	1437.82	0	1.02
2018-08-17	04:41:00	2018-08-17 04:41:00	74.7335	-95.1373	-0.94	29.96	3.25	1437.81	0	1.02
2018-08-17	04:42:00	2018-08-17 04:42:00	74.7335	-95.1373	-0.9	29.96	3.32	1437.98	0	1.02
2018-08-17	04:43:00	2018-08-17 04:43:00	74.7335	-95.1373	-0.81	29.96	3.25	1438.26	0	1.02
2018-08-17	04:44:00	2018-08-17 04:44:00	74.7335	-95.1373	-0.71	29.95	3.28	1438.79	0	1.03
2018-08-17	04:45:00	2018-08-17 04:45:00	74.7335	-95.1373	-0.72	29.95	3.28	1438.87	0	1.02
2018-08-17	04:46:00	2018-08-17 04:46:00	74.7335	-95.1373	-0.7	29.95	3.21	1438.98	0.02	1.03
2018-08-17	04:47:00	2018-08-17 04:47:00	74.7336	-95.1373	-0.73	29.95	3.28	1438.84	0.02	1.02
2018-08-17	04:48:00	2018-08-17 04:48:00	74.7335	-95.1373	-0.61	29.95	3.24	1439.15	0	1.02
2018-08-17	04:49:00	2018-08-17 04:49:00	74.7335	-95.1373	-0.66	29.95	3.17	1439.3	0	1.02
2018-08-17	04:50:00	2018-08-17 04:50:00	74.7335	-95.1373	-0.67	29.95	3.22	1439.08	0	1.03
2018-08-17	04:51:00	2018-08-17 04:51:00	74.7335	-95.1373	-0.7	29.95	3.2	1439.03	0.02	1.02
2018-08-17	04:52:00	2018-08-17 04:52:00	74.7336	-95.1373	-0.73	29.95	3.27	1438.82	0.03	1.02
2018-08-17	04:53:00	2018-08-17 04:53:00	74.7336	-95.1373	-0.65	29.95	3.19	1439.03	0.02	1.02
2018-08-17	04:54:00	2018-08-17 04:54:00	74.7335	-95.1373	-0.59	29.94	3.24	1439.36	0	1.03
2018-08-17	04:55:00	2018-08-17 04:55:00	74.7336	-95.1373	-0.58	29.94	3.26	1439.49	0	1.02
2018-08-17	04:56:00	2018-08-17 04:56:00	74.7336	-95.1373	-0.61	29.94	3.22	1439.43	0	1.02
2018-08-17	04:57:00	2018-08-17 04:57:00	74.7336	-95.1373	-0.68	29.94	3.23	1439.16	0	1.02
2018-08-17	04:58:00	2018-08-17 04:58:00	74.7336	-95.1373	-0.68	29.94	3.24	1438.99	0	1.03
2018-08-17	04:59:00	2018-08-17 04:59:00	74.7336	-95.1373	-0.67	29.94	3.24	1439.03	0	1.03
2018-08-17	05:00:00	2018-08-17 05:00:00	74.7336	-95.1372	-0.6	29.94	3.24	1439.35	0	1.02
2018-08-17	05:01:00	2018-08-17 05:01:00	74.7336	-95.1372	-0.64	29.93	3.2	1439.34	0	1.02
2018-08-17	05:02:00	2018-08-17 05:02:00	74.7336	-95.1372	-0.74	29.94	3.28	1438.91	0	1.02
2018-08-17	05:03:00	2018-08-17 05:03:00	74.7336	-95.1372	-0.75	29.94	3.25	1438.72	0	1.02
2018-08-17	05:04:00	2018-08-17 05:04:00	74.7336	-95.1372	-0.82	29.94	3.28	1438.44	0	1.02
2018-08-17	05:05:00	2018-08-17 05:05:00	74.7336	-95.1372	-0.84	29.94	3.24	1438.3	0	1.02
2018-08-17	05:06:00	2018-08-17 05:06:00	74.7336	-95.1372	-0.88	29.94	3.23	1438.11	0	1.02
2018-08-17	05:07:00	2018-08-17 05:07:00	74.7336	-95.1372	-0.89	29.93	3.26	1438.01	0	1.02
2018-08-17	05:08:00	2018-08-17 05:08:00	74.7336	-95.1372	-0.91	29.93	3.25	1438.06	0	1.01
2018-08-17	05:09:00	2018-08-17 05:09:00	74.7336	-95.1372	-0.93	29.93	3.3	1437.89	0	1.01
2018-08-17	05:10:00	2018-08-17 05:10:00	74.7336	-95.1372	-0.97	29.93	3.2	1437.69	0	1.01
2018-08-17	05:11:00	2018-08-17 05:11:00	74.7336	-95.1372	-0.99	29.93	3.33	1437.56	0	1.01
2018-08-17	05:12:00	2018-08-17 05:12:00	74.7336	-95.1372	-1.02	29.93	3.31	1437.47	0	1.01
2018-08-17	05:13:00	2018-08-17 05:13:00	74.7336	-95.1372	-1.03	29.93	3.28	1437.37	0	1.01
2018-08-17	05:14:00	2018-08-17 05:14:00	74.7336	-95.1372	-1.04	29.93	3.3	1437.29	0	1.02
2018-08-17	05:15:00	2018-08-17 05:15:00	74.7336	-95.1372	-1.04	29.94	3.36	1437.28	0	1.01
2018-08-17	05:16:00	2018-08-17 05:16:00	74.7336	-95.1372	-1.05	29.94	3.33	1437.29	0.03	1.01
2018-08-17	05:17:00	2018-08-17 05:17:00	74.7336	-95.1372	-1.05	29.94	3.31	1437.26	0.03	1.02
2018-08-17	05:18:00	2018-08-17 05:18:00	74.7336	-95.1372	-1.06	29.94	3.27	1437.22	0	1.01
2018-08-17	05:19:00	2018-08-17 05:19:00	74.7336	-95.1372	-1.07	29.94	3.33	1437.19	0.01	1.01
2018-08-17	05:20:00	2018-08-17 05:20:00	74.7336	-95.1372	-1.07	29.94	3.32	1437.17	0.01	1.01
2018-08-17	05:21:00	2018-08-17 05:21:00	74.7336	-95.1372	-1.06	29.93	3.3	1437.2	0	1.02
2018-08-17	05:22:00	2018-08-17 05:22:00	74.7336	-95.1372	-1.07	29.93	3.38	1437.17	0	1.01
2018-08-17	05:23:00	2018-08-17 05:23:00	74.7336	-95.1372	-1.08	29.93	3.38	1437.16	0	1.01
2018-08-17	05:24:00	2018-08-17 05:24:00	74.7336	-95.1372	-1.09	29.93	3.32	1437.09	0	1.01
2018-08-17	05:25:00	2018-08-17 05:25:00	74.7336	-95.1372	-1.1	29.93	3.33	1437.04	0.02	1.01
2018-08-17	05:26:00	2018-08-17 05:26:00	74.7336	-95.1372	-1.11	29.93	3.37	1437.01	0.02	1.01
2018-08-17	05:27:00	2018-08-17 05:27:00	74.7336	-95.1372	-1.12	29.93	3.35	1436.95	0	1.01
2018-08-17	05:28:00	2018-08-17 05:28:00	74.7336	-95.1372	-1.12	29.93	3.4	1436.94	0	1.01
2018-08-17	05:29:00	2018-08-17 05:29:00	74.7336	-95.1372	-1.13	29.93	3.28	1436.89	0	1.04
2018-08-17	05:30:00	2018-08-17 05:30:00	74.7336	-95.1372	-1.12	29.93	3.39	1436.92	0	1.06
2018-08-17	05:31:00	2018-08-17 05:31:00	74.7336	-95.1372	-1.1	29.93	3.32	1436.98	0	1.05
2018-08-17	05:32:00	2018-08-17 05:32:00	74.7336	-95.1372	-1.1	29.93	3.3	1437.01	0	1.06
2018-08-17	05:33:00	2018-08-17 05:33:00	74.7336	-95.1372	-1.1	29.93	3.34	1437	0	1.06
2018-08-17	05:34:00	2018-08-17 05:34:00	74.7336	-95.1372	-1.12	29.93	3.31	1436.95	0	1.05
2018-08-17	05:35:00	2018-08-17 05:35:00	74.7336	-95.1372	-1.12	29.93	3.33	1436.93	0.01	1.05
2018-08-17	05:36:00	2018-08-17 05:36:00	74.7336	-95.1372	-1.12	29.92	3.32	1436.93	0.01	1.06
2018-08-17	05:37:00	2018-08-17 05:37:00	74.7336	-95.1372	-1.12	29.92	3.38	1436.92	0	1.05
2018-08-17	05:38:00	2018-08-17 05:38:00	74.7336	-95.1372	-1.11	29.92	3.29	1436.96	0	1.05
2018-08-17	05:39:00	2018-08-17 05:39:00	74.7336	-95.1372	-1.1	29.92	3.32	1436.97	0	1.05
2018-08-17	05:40:00	2018-08-17 05:40:00	74.7336	-95.1372	-1.1	29.92	3.33	1437.01	0	1.06
2018-08-17	05:41:00	2018-08-17 05:41:00	74.7336	-95.1372	-1.1	29.92	3.28	1437.01	0	1.06
2018-08-17	05:42:00	2018-08-17 05:42:00	74.7336	-95.1372	-1.1	29.92	3.35	1437	0.02	1.05
2018-08-17	05:43:00	2018-08-17 05:43:00	74.7336	-95.1372	-1.11	29.92	3.24	1436.97	0.03	1.06
2018-08-17	05:44:00	2018-08-17 05:44:00	74.7336	-95.1372	-1.1	29.91	3.23	1437	0.01	1.06
2018-08-17	05:45:00	2018-08-17 05:45:00	74.7336	-95.1372	-1.11	29.91	3.3	1436.96	0.01	1.05
2018-08-17	05:46:00	2018-08-17 05:46:00	74.7336	-95.1372	-1.1	29.91	3.23	1436.96	0.03	1.06
2018-08-17	05:47:00	2018-08-17 05:47:00	74.7336	-95.1373	-1.08	29.91	3.23	1437.11	0.02	1.05
2018-08-17	05:48:00	2018-08-17 05:48:00	74.7336	-95.1373	-1.07	29.91	3.29	1437.11	0	1.06
2018-08-17	05:49:00	2018-08-17 05:49:00	74.7336	-95.1373	-1.07	29.92	3.24	1437.17	0.02	1.05
2018-08-17	05:50:00	2018-08-17 05:50:00	74.7336	-95.1373	-1.09	29.92	3.32	1437.1	0.03	1.06
2018-08-17	05:51:00	2018-08-17 05:51:00	74.7336	-95.1373	-1.1	29.92	3.23	1437.02	0.02	1.06
2018-08-17	05:52:00	2018-08-17 05:52:00	74.7336	-95.1373	-1.1	29.92	3.34	1437.02	0	1.05
2018-08-17	05:53:00	2018-08-17 05:53:00	74.7336	-95.1373	-1.11	29.92	3.3	1437	0.02	1.05
2018-08-17	05:54:00	2018-08-17 05:54:00	74.7336	-95.1373	-1.1	29.92	3.15	1436.97	0.03	1.06
2018-08-17	05:55:00	2018-08-17 05:55:00	74.7336	-95.1373	-1.1	29.91	3.26	1437	0.01	1.06
2018-08-17	05:56:00	2018-08-17 05:56:00	74.7336	-95.1373	-1.11	29.91	3.35	1436.96	0	1.06
2018-08-17	05:57:00	2018-08-17 05:57:00	74.7336	-95.1373	-1.11	29.91	3.31	1436.96	0	1.05
2018-08-17	05:58:00	2018-08-17 05:58:00	74.7336	-95.1373	-1.12	29.91	3.23	1436.94	0	1.06
2018-08-17	05:59:00	2018-08-17 05:59:00	74.7336	-95.1373	-1.12	29.91	3.33	1436.9	0.01	1.06
2018-08-17	06:00:00	2018-08-17 06:00:00	74.7336	-95.1373	-1.12	29.91	3.23	1436.88	0.01	1.05
2018-08-17	06:01:00	2018-08-17 06:01:00	74.7336	-95.1373	-1.12	29.91	3.3	1436.89	0	1.05
2018-08-17	06:02:00	2018-08-17 06:02:00	74.7336	-95.1373	-1.12	29.91	3.24	1436.91	0.01	1.06
2018-08-17	06:03:00	2018-08-17 06:03:00	74.7336	-95.1373	-1.12	29.91	3.26	1436.91	0.01	1.05
2018-08-17	06:04:00	2018-08-17 06:04:00	74.7337	-95.1373	-1.11	29.91	3.25	1436.92	0	1.05
2018-08-17	06:05:00	2018-08-17 06:05:00	74.7337	-95.1373	-1.09	29.91	3.27	1437.03	0	1.06
2018-08-17	06:06:00	2018-08-17 06:06:00	74.7337	-95.1373	-1.08	29.91	3.21	1437.07	0.03	1.06
2018-08-17	06:07:00	2018-08-17 06:07:00	74.7337	-95.1372	-1.08	29.91	3.26	1437.08	0.06	1.06
2018-08-17	06:08:00	2018-08-17 06:08:00	74.7337	-95.1371	-1.09	29.91	3.25	1437.06	0.07	1.06
2018-08-17	06:09:00	2018-08-17 06:09:00	74.7337	-95.1371	-1.09	29.91	3.18	1437.03	0.1	1.05
2018-08-17	06:10:00	2018-08-17 06:10:00	74.7337	-95.1371	-1.1	29.91	3.2	1436.99	0.1	1.06
2018-08-17	06:11:00	2018-08-17 06:11:00	74.7337	-95.1371	-1.1	29.91	3.27	1436.96	0.08	1.06
2018-08-17	06:12:00	2018-08-17 06:12:00	74.7337	-95.137	-1.11	29.9	3.23	1436.93	0.04	1.05
2018-08-17	06:13:00	2018-08-17 06:13:00	74.7337	-95.137	-1.11	29.9	3.24	1436.93	0.01	1.06
2018-08-17	06:14:00	2018-08-17 06:14:00	74.7337	-95.137	-1.11	29.9	3.24	1436.95	0.03	1.06
2018-08-17	06:15:00	2018-08-17 06:15:00	74.7337	-95.137	-1.1	29.9	3.25	1437	0.04	1.06
2018-08-17	06:16:00	2018-08-17 06:16:00	74.7337	-95.1369	-1.1	29.91	3.26	1436.99	0.03	1.05
2018-08-17	06:17:00	2018-08-17 06:17:00	74.7337	-95.1369	-1.1	29.91	3.3	1436.99	0.03	1.06
2018-08-17	06:18:00	2018-08-17 06:18:00	74.7337	-95.1369	-1.11	29.92	3.26	1436.99	0.03	1.06
2018-08-17	06:19:00	2018-08-17 06:19:00	74.7337	-95.1368	-1.11	29.93	3.26	1436.97	0.02	1.05
2018-08-17	06:20:00	2018-08-17 06:20:00	74.7337	-95.1369	-1.11	29.93	3.22	1436.99	0.03	1.06
2018-08-17	06:21:00	2018-08-17 06:21:00	74.7337	-95.1368	-0.97	29.94	3.26	1437.57	0.05	1.05
2018-08-17	06:22:00	2018-08-17 06:22:00	74.7337	-95.1368	-1.01	29.95	3.23	1437.49	0.04	1.05
2018-08-17	06:23:00	2018-08-17 06:23:00	74.7337	-95.1368	-0.97	29.95	3.25	1437.67	0.02	1.05
2018-08-17	06:24:00	2018-08-17 06:24:00	74.7338	-95.1369	-0.94	29.95	3.2	1437.7	0.03	1.06
2018-08-17	06:25:00	2018-08-17 06:25:00	74.7338	-95.1369	-0.87	29.95	3.25	1438.05	0.03	1.05
2018-08-17	06:26:00	2018-08-17 06:26:00	74.7338	-95.1368	-0.91	29.95	3.25	1438.07	0	1.06
2018-08-17	06:27:00	2018-08-17 06:27:00	74.7338	-95.1368	-0.92	29.96	3.3	1437.95	0	1.05
2018-08-17	06:28:00	2018-08-17 06:28:00	74.7338	-95.1368	-0.94	29.96	3.28	1437.86	0.01	1.06
2018-08-17	06:29:00	2018-08-17 06:29:00	74.7338	-95.1368	-0.95	29.97	3.29	1437.77	0.03	1.06
2018-08-17	06:30:00	2018-08-17 06:30:00	74.7338	-95.1367	-0.98	29.97	3.26	1437.75	0.03	1.05
2018-08-17	06:31:00	2018-08-17 06:31:00	74.7338	-95.1367	-1	29.98	3.39	1437.59	0.01	1.05
2018-08-17	06:32:00	2018-08-17 06:32:00	74.7338	-95.1367	-1.01	29.98	3.35	1437.52	0.02	1.05
2018-08-17	06:33:00	2018-08-17 06:33:00	74.7338	-95.1368	-0.93	29.99	3.35	1437.69	0.01	1.05
2018-08-17	06:34:00	2018-08-17 06:34:00	74.7338	-95.1368	-0.89	29.99	3.31	1438.13	0.04	1.06
2018-08-17	06:35:00	2018-08-17 06:35:00	74.7338	-95.1368	-0.9	29.99	3.35	1438.07	0.07	1.05
2018-08-17	06:36:00	2018-08-17 06:36:00	74.7338	-95.1368	-0.92	29.99	3.38	1438.03	0.05	1.05
2018-08-17	06:37:00	2018-08-17 06:37:00	74.7338	-95.1368	-0.94	29.99	3.34	1437.88	0.03	1.05
2018-08-17	06:38:00	2018-08-17 06:38:00	74.7338	-95.1368	-0.95	29.99	3.45	1437.84	0	1.06
2018-08-17	06:39:00	2018-08-17 06:39:00	74.7338	-95.1368	-0.96	29.99	3.48	1437.77	0.01	1.05
2018-08-17	06:40:00	2018-08-17 06:40:00	74.7338	-95.1367	-0.97	29.99	3.36	1437.72	0.05	1.05
2018-08-17	06:41:00	2018-08-17 06:41:00	74.7338	-95.1367	-0.95	29.99	3.42	1437.84	0.05	1.06
2018-08-17	06:42:00	2018-08-17 06:42:00	74.7338	-95.1367	-0.95	29.99	3.38	1437.79	0.05	1.06
2018-08-17	06:43:00	2018-08-17 06:43:00	74.7338	-95.1367	-0.93	29.99	3.37	1437.92	0.07	1.05
2018-08-17	06:44:00	2018-08-17 06:44:00	74.7338	-95.1367	-0.86	29.99	3.39	1438.14	0.07	1.05
2018-08-17	06:45:00	2018-08-17 06:45:00	74.7338	-95.1367	-0.84	29.99	3.26	1438.33	0.09	1.06
2018-08-17	06:46:00	2018-08-17 06:46:00	74.7338	-95.1367	-0.85	29.99	3.4	1438.29	0.1	1.05
2018-08-17	06:47:00	2018-08-17 06:47:00	74.7338	-95.1367	-0.88	29.99	3.4	1438.16	0.1	1.06
2018-08-17	06:48:00	2018-08-17 06:48:00	74.7338	-95.1367	-0.88	29.99	3.37	1438.16	0.08	1.06
2018-08-17	06:49:00	2018-08-17 06:49:00	74.7338	-95.1367	-0.85	29.99	3.48	1438.3	0.05	1.06
2018-08-17	06:50:00	2018-08-17 06:50:00	74.7338	-95.1367	-0.86	29.99	3.4	1438.24	0.03	1.06
2018-08-17	06:51:00	2018-08-17 06:51:00	74.7338	-95.1367	-0.88	29.99	3.39	1438.18	0.05	1.05
2018-08-17	06:52:00	2018-08-17 06:52:00	74.7338	-95.1366	-0.94	29.99	3.49	1437.95	0.09	1.06
2018-08-17	06:53:00	2018-08-17 06:53:00	74.7338	-95.1366	-0.96	29.99	3.45	1437.82	0.1	1.06
2018-08-17	06:54:00	2018-08-17 06:54:00	74.7338	-95.1367	-0.95	29.99	3.38	1437.8	0.07	1.06
2018-08-17	06:55:00	2018-08-17 06:55:00	74.7339	-95.1367	-0.85	29.99	3.45	1438.19	0.07	1.06
2018-08-17	06:56:00	2018-08-17 06:56:00	74.7339	-95.1367	-0.81	29.99	3.42	1438.42	0.1	1.06
2018-08-17	06:57:00	2018-08-17 06:57:00	74.7339	-95.1368	-0.8	29.99	3.37	1438.5	0.13	1.05
2018-08-17	06:58:00	2018-08-17 06:58:00	74.7339	-95.1369	-0.81	29.99	3.31	1438.5	0.16	1.06
2018-08-17	06:59:00	2018-08-17 06:59:00	74.734	-95.1369	-0.84	29.99	3.41	1438.37	0.13	1.05
2018-08-17	07:00:00	2018-08-17 07:00:00	74.734	-95.1368	-0.88	29.99	3.41	1438.26	0.14	1.05
2018-08-17	07:01:00	2018-08-17 07:01:00	74.734	-95.1368	-0.89	29.99	3.39	1438.1	0.15	1.06
2018-08-17	07:02:00	2018-08-17 07:02:00	74.734	-95.1367	-0.87	29.98	3.37	1438.14	0.18	1.05
2018-08-17	07:03:00	2018-08-17 07:03:00	74.734	-95.1365	-0.89	29.97	3.45	1438.09	0.22	1.05
2018-08-17	07:04:00	2018-08-17 07:04:00	74.7341	-95.1364	-0.89	29.96	3.36	1438.05	0.18	1.06
2018-08-17	07:05:00	2018-08-17 07:05:00	74.7341	-95.1364	-0.86	30	3.33	1438.29	0.07	1.06
2018-08-17	07:06:00	2018-08-17 07:06:00	74.7341	-95.1364	-0.82	30.07	3.55	1438.59	0.08	1.05
2018-08-17	07:07:00	2018-08-17 07:07:00	74.7341	-95.1363	-0.8	30.16	3.7	1438.79	0.18	1.05
2018-08-17	07:08:00	2018-08-17 07:08:00	74.734	-95.1363	-0.79	30.22	3.77	1438.88	0.16	1.05
2018-08-17	07:09:00	2018-08-17 07:09:00	74.734	-95.1363	-0.79	30.24	3.91	1438.9	0.14	1.05
2018-08-17	07:10:00	2018-08-17 07:10:00	74.734	-95.1364	-0.77	30.22	3.83	1438.96	0.17	1.05
2018-08-17	07:11:00	2018-08-17 07:11:00	74.734	-95.1365	-0.76	30.21	3.85	1439	0.16	1.06
2018-08-17	07:12:00	2018-08-17 07:12:00	74.734	-95.1366	-0.77	30.22	3.85	1439.01	0.18	1.05
2018-08-17	07:13:00	2018-08-17 07:13:00	74.734	-95.1366	-0.78	30.25	3.91	1438.97	0.25	1.04
2018-08-17	07:14:00	2018-08-17 07:14:00	74.7339	-95.1365	-0.81	30.25	3.88	1438.82	0.19	1.04
2018-08-17	07:15:00	2018-08-17 07:15:00	74.7339	-95.1366	-0.83	30.22	3.85	1438.69	0.11	1.05
2018-08-17	07:16:00	2018-08-17 07:16:00	74.7339	-95.1367	-0.84	30.2	3.91	1438.62	0.12	1.05
2018-08-17	07:17:00	2018-08-17 07:17:00	74.7339	-95.1368	-0.87	30.21	3.77	1438.58	0.17	1.04
2018-08-17	07:18:00	2018-08-17 07:18:00	74.7339	-95.1369	-0.87	30.19	3.75	1438.46	0.45	1.04
2018-08-17	07:19:00	2018-08-17 07:19:00	74.7337	-95.1366	-0.94	30.13	3.59	1438	0.5	1.05
2018-08-17	07:20:00	2018-08-17 07:20:00	74.7337	-95.1368	-0.96	30.07	3.55	1437.87	0.23	1.04
2018-08-17	07:21:00	2018-08-17 07:21:00	74.7338	-95.1369	-0.94	30.04	3.58	1437.84	0.21	1.05
2018-08-17	07:22:00	2018-08-17 07:22:00	74.7338	-95.1371	-0.9	30.01	3.42	1438.04	0.2	1.04
2018-08-17	07:23:00	2018-08-17 07:23:00	74.7338	-95.1373	-0.9	29.99	3.44	1438.02	0.18	1.05
2018-08-17	07:24:00	2018-08-17 07:24:00	74.7338	-95.1374	-0.91	29.97	3.43	1438	0.16	1.03
2018-08-17	07:25:00	2018-08-17 07:25:00	74.7337	-95.1375	-0.94	29.95	3.47	1437.86	0.14	1.04
2018-08-17	07:26:00	2018-08-17 07:26:00	74.7337	-95.1376	-0.96	29.93	3.45	1437.68	0.16	1.04
2018-08-17	07:27:00	2018-08-17 07:27:00	74.7337	-95.1377	-0.98	29.9	3.44	1437.57	0.2	1.04
2018-08-17	07:28:00	2018-08-17 07:28:00	74.7336	-95.1377	-0.99	29.89	3.4	1437.49	0.29	1.05
2018-08-17	07:29:00	2018-08-17 07:29:00	74.7336	-95.1376	-1.01	29.88	3.38	1437.39	0.61	1.05
2018-08-17	07:30:00	2018-08-17 07:30:00	74.7334	-95.1369	-1.06	29.83	3.37	1436.98	0.51	1.03
2018-08-17	07:31:00	2018-08-17 07:31:00	74.7334	-95.137	-1.07	29.75	3.22	1436.89	0.2	1.03
2018-08-17	07:32:00	2018-08-17 07:32:00	74.7335	-95.1372	-1.01	29.74	3.29	1437.28	0.23	1.04
2018-08-17	07:33:00	2018-08-17 07:33:00	74.7335	-95.1374	-0.98	29.86	3.38	1437.48	0.26	1.02
2018-08-17	07:34:00	2018-08-17 07:34:00	74.7335	-95.1376	-0.96	29.92	3.51	1437.66	0.28	1.01
2018-08-17	07:35:00	2018-08-17 07:35:00	74.7335	-95.1376	-0.92	29.95	3.59	1437.86	0.24	1.02
2018-08-17	07:36:00	2018-08-17 07:36:00	74.7335	-95.1376	-0.91	29.95	3.64	1437.97	0.26	1
2018-08-17	07:37:00	2018-08-17 07:37:00	74.7336	-95.1378	-0.9	29.97	3.6	1438	0.23	1.02
2018-08-17	07:38:00	2018-08-17 07:38:00	74.7336	-95.1378	-0.91	29.96	3.5	1437.99	0.25	1.02
2018-08-17	07:39:00	2018-08-17 07:39:00	74.7337	-95.138	-0.91	29.95	3.56	1437.95	0.45	1.01
2018-08-17	07:40:00	2018-08-17 07:40:00	74.7336	-95.1375	-0.91	29.95	3.61	1437.99	0.39	1.02
2018-08-17	07:41:00	2018-08-17 07:41:00	74.7336	-95.1374	-0.91	29.97	3.65	1437.97	0.23	1.01
2018-08-17	07:42:00	2018-08-17 07:42:00	74.7335	-95.1374	-0.94	29.95	3.52	1437.82	0.16	1.01
2018-08-17	07:43:00	2018-08-17 07:43:00	74.7335	-95.1374	-0.97	29.91	3.51	1437.58	0.13	1.02
2018-08-17	07:44:00	2018-08-17 07:44:00	74.7335	-95.1373	-0.99	29.85	3.37	1437.42	0.13	1.02
2018-08-17	07:45:00	2018-08-17 07:45:00	74.7335	-95.1372	-0.99	29.82	3.39	1437.41	0.13	1
2018-08-17	07:46:00	2018-08-17 07:46:00	74.7335	-95.1373	-0.99	29.81	3.47	1437.41	0.26	1
2018-08-17	07:47:00	2018-08-17 07:47:00	74.7334	-95.1375	-0.98	29.82	3.55	1437.44	0.43	1.04
2018-08-17	07:48:00	2018-08-17 07:48:00	74.7333	-95.1378	-1.02	29.82	3.42	1437.17	0.35	1.04
2018-08-17	07:49:00	2018-08-17 07:49:00	74.7333	-95.1378	-1.03	29.82	3.49	1437.24	0.27	1.05
2018-08-17	07:50:00	2018-08-17 07:50:00	74.7332	-95.1377	-1.02	29.86	3.46	1437.3	0.33	1.05
2018-08-17	07:51:00	2018-08-17 07:51:00	74.7331	-95.1376	-0.93	30	3.49	1438.15	0.23	1.05
2018-08-17	07:52:00	2018-08-17 07:52:00	74.7332	-95.1376	-0.9	30.32	3.62	1438.51	0.23	1.05
2018-08-17	07:53:00	2018-08-17 07:53:00	74.7331	-95.1374	-0.85	30.48	3.71	1439.17	0.29	1.06
2018-08-17	07:54:00	2018-08-17 07:54:00	74.7331	-95.1371	-0.86	30.68	3.93	1439.11	0.18	1.05
2018-08-17	07:55:00	2018-08-17 07:55:00	74.7331	-95.137	-0.88	30.58	3.91	1438.89	0.21	1.05
2018-08-17	07:56:00	2018-08-17 07:56:00	74.7332	-95.1372	-0.87	30.5	3.84	1438.84	0.38	1.05
2018-08-17	07:57:00	2018-08-17 07:57:00	74.7332	-95.1374	-0.81	30.46	3.87	1438.98	0.34	1.05
2018-08-17	07:58:00	2018-08-17 07:58:00	74.7333	-95.1376	-0.79	30.37	3.85	1439.01	0.28	1.05
2018-08-17	07:59:00	2018-08-17 07:59:00	74.7334	-95.1378	-0.78	30.32	3.9	1439.01	0.25	1.05
2018-08-17	08:00:00	2018-08-17 08:00:00	74.7334	-95.1379	-0.8	30.28	3.93	1438.9	0.21	1.04
2018-08-17	08:01:00	2018-08-17 08:01:00	74.7334	-95.1381	-0.8	30.25	3.95	1438.84	0.25	1.05
2018-08-17	08:02:00	2018-08-17 08:02:00	74.7334	-95.1382	-0.81	30.23	3.92	1438.8	0.29	1.05
2018-08-17	08:03:00	2018-08-17 08:03:00	74.7334	-95.1385	-0.82	30.21	3.91	1438.75	0.28	1.05
2018-08-17	08:04:00	2018-08-17 08:04:00	74.7334	-95.1387	-0.82	30.19	3.93	1438.71	0.27	1.06
2018-08-17	08:05:00	2018-08-17 08:05:00	74.7335	-95.139	-0.82	30.19	3.87	1438.7	0.23	1.05
2018-08-17	08:06:00	2018-08-17 08:06:00	74.7335	-95.1391	-0.83	30.17	3.76	1438.64	0.17	1.05
2018-08-17	08:07:00	2018-08-17 08:07:00	74.7335	-95.1389	-0.83	30.15	3.84	1438.58	0.3	1.05
2018-08-17	08:08:00	2018-08-17 08:08:00	74.7334	-95.1385	-0.87	30.14	3.83	1438.4	0.34	1.06
2018-08-17	08:09:00	2018-08-17 08:09:00	74.7335	-95.1386	-0.9	30.09	3.75	1438.18	0.47	1.03
2018-08-17	08:10:00	2018-08-17 08:10:00	74.7336	-95.1391	-0.9	30.06	3.73	1438.14	0.48	1.06
2018-08-17	08:11:00	2018-08-17 08:11:00	74.7336	-95.1392	-0.9	30.06	3.65	1438.17	0.23	1.06
2018-08-17	08:12:00	2018-08-17 08:12:00	74.7336	-95.1391	-0.92	30.05	3.59	1438.08	0.14	1.06
2018-08-17	08:13:00	2018-08-17 08:13:00	74.7337	-95.1392	-0.93	30.04	3.55	1437.98	0.13	1.05
2018-08-17	08:14:00	2018-08-17 08:14:00	74.7337	-95.1391	-0.93	30.03	3.56	1437.96	0.11	1.05
2018-08-17	08:15:00	2018-08-17 08:15:00	74.7337	-95.1391	-0.93	30.03	3.62	1437.93	0.1	1.05
2018-08-17	08:16:00	2018-08-17 08:16:00	74.7337	-95.139	-0.93	30.02	3.45	1437.95	0.08	1.06
2018-08-17	08:17:00	2018-08-17 08:17:00	74.7337	-95.139	-0.94	30.02	3.48	1437.9	0.11	1.06
2018-08-17	08:18:00	2018-08-17 08:18:00	74.7337	-95.1391	-0.94	30.02	3.56	1437.9	0.15	1.05
2018-08-17	08:19:00	2018-08-17 08:19:00	74.7337	-95.139	-0.94	30.02	3.52	1437.93	0.13	1.05
2018-08-17	08:20:00	2018-08-17 08:20:00	74.7337	-95.1389	-0.94	30.03	3.63	1437.91	0.14	1.05
2018-08-17	08:21:00	2018-08-17 08:21:00	74.7338	-95.139	-0.94	30.03	3.5	1437.9	0.13	1.06
2018-08-17	08:22:00	2018-08-17 08:22:00	74.7337	-95.1389	-0.95	30.03	3.63	1437.89	0.08	1.05
2018-08-17	08:23:00	2018-08-17 08:23:00	74.7338	-95.139	-0.94	30.03	3.55	1437.89	0.12	1.05
2018-08-17	08:24:00	2018-08-17 08:24:00	74.7338	-95.1389	-0.95	30.03	3.51	1437.84	0.16	1.05
2018-08-17	08:25:00	2018-08-17 08:25:00	74.7338	-95.1389	-0.96	30	3.56	1437.79	0.13	1.06
2018-08-17	08:26:00	2018-08-17 08:26:00	74.7338	-95.1388	-0.96	29.99	3.53	1437.78	0.1	1.05
2018-08-17	08:27:00	2018-08-17 08:27:00	74.7338	-95.1388	-0.96	29.99	3.57	1437.77	0.1	1.05
2018-08-17	08:28:00	2018-08-17 08:28:00	74.7338	-95.1387	-0.96	29.99	3.58	1437.77	0.09	1.05
2018-08-17	08:29:00	2018-08-17 08:29:00	74.7339	-95.1387	-0.97	29.99	3.56	1437.75	0.09	1.06
2018-08-17	08:30:00	2018-08-17 08:30:00	74.7339	-95.1387	-0.99	29.96	3.53	1437.6	0.22	1.06
2018-08-17	08:31:00	2018-08-17 08:31:00	74.7339	-95.1389	-0.99	29.94	3.43	1437.54	0.35	1.04
2018-08-17	08:32:00	2018-08-17 08:32:00	74.734	-95.1392	-0.9	29.94	3.49	1437.65	0.36	1.06
2018-08-17	08:33:00	2018-08-17 08:33:00	74.734	-95.1394	-0.85	29.94	3.38	1438.16	0.3	1.05
2018-08-17	08:34:00	2018-08-17 08:34:00	74.7341	-95.1396	-0.83	29.96	3.43	1438.34	0.19	1.04
2018-08-17	08:35:00	2018-08-17 08:35:00	74.7341	-95.1396	-0.87	29.94	3.43	1438.14	0.2	1.05
2018-08-17	08:36:00	2018-08-17 08:36:00	74.7342	-95.1398	-0.88	29.91	3.33	1438.04	0.18	1.05
2018-08-17	08:37:00	2018-08-17 08:37:00	74.7342	-95.1397	-0.96	29.88	3.29	1437.73	0.11	1.05
2018-08-17	08:38:00	2018-08-17 08:38:00	74.7342	-95.1398	-0.96	29.85	3.35	1437.59	0.12	1.05
2018-08-17	08:39:00	2018-08-17 08:39:00	74.7342	-95.1397	-0.98	29.85	3.35	1437.53	0.08	1.06
2018-08-17	08:40:00	2018-08-17 08:40:00	74.7342	-95.1397	-0.98	29.87	3.33	1437.51	0.04	1.06
2018-08-17	08:41:00	2018-08-17 08:41:00	74.7342	-95.1397	-1	29.87	3.29	1437.43	0.03	1.05
2018-08-17	08:42:00	2018-08-17 08:42:00	74.7342	-95.1397	-1.02	29.86	3.26	1437.31	0.1	1.05
2018-08-17	08:43:00	2018-08-17 08:43:00	74.7342	-95.1398	-1.05	29.83	3.24	1437.17	0.13	1.06
2018-08-17	08:44:00	2018-08-17 08:44:00	74.7342	-95.1399	-1.07	29.8	3.2	1437.01	0.09	1.06
2018-08-17	08:45:00	2018-08-17 08:45:00	74.7342	-95.1399	-1.11	29.75	3.27	1436.8	0.13	1.04
2018-08-17	08:46:00	2018-08-17 08:46:00	74.7342	-95.14	-1.13	29.71	3.11	1436.62	0.15	1.05
2018-08-17	08:47:00	2018-08-17 08:47:00	74.7342	-95.14	-1.14	29.69	3.13	1436.53	0.11	1.05
2018-08-17	08:48:00	2018-08-17 08:48:00	74.7342	-95.1401	-1.15	29.68	3.08	1436.44	0.11	1.05
2018-08-17	08:49:00	2018-08-17 08:49:00	74.7342	-95.1401	-1.15	29.67	2.96	1436.41	0.12	1.05
2018-08-17	08:50:00	2018-08-17 08:50:00	74.7341	-95.1402	-1.16	29.67	2.94	1436.41	0.11	1.05
2018-08-17	08:51:00	2018-08-17 08:51:00	74.7341	-95.1402	-1.16	29.66	2.93	1436.38	0.15	1.05
2018-08-17	08:52:00	2018-08-17 08:52:00	74.734	-95.1403	-1.16	29.66	3.03	1436.37	0.17	1.05
2018-08-17	08:53:00	2018-08-17 08:53:00	74.734	-95.1404	-1.17	29.66	2.94	1436.34	0.16	1.06
2018-08-17	08:54:00	2018-08-17 08:54:00	74.7341	-95.1406	-1.17	29.66	2.98	1436.3	0.23	1.06
2018-08-17	08:55:00	2018-08-17 08:55:00	74.7341	-95.1408	-1.17	29.66	3.04	1436.32	0.28	1.05
2018-08-17	08:56:00	2018-08-17 08:56:00	74.7341	-95.1411	-1.17	29.67	3.03	1436.33	0.26	1.05
2018-08-17	08:57:00	2018-08-17 08:57:00	74.7341	-95.1413	-1.17	29.68	3.04	1436.34	0.23	1.04
2018-08-17	08:58:00	2018-08-17 08:58:00	74.7341	-95.1414	-1.17	29.69	3.06	1436.37	0.26	1.05
2018-08-17	08:59:00	2018-08-17 08:59:00	74.734	-95.1415	-1.17	29.7	3.07	1436.4	0.32	1.05
2018-08-17	09:00:00	2018-08-17 09:00:00	74.7341	-95.1418	-1.17	29.71	3.04	1436.41	0.36	1.05
2018-08-17	09:01:00	2018-08-17 09:01:00	74.7341	-95.142	-1.17	29.72	3.08	1436.41	0.33	1.05
2018-08-17	09:02:00	2018-08-17 09:02:00	74.734	-95.142	-1.17	29.73	3.01	1436.41	0.24	1.04
2018-08-17	09:03:00	2018-08-17 09:03:00	74.734	-95.1422	-1.17	29.73	3.17	1436.42	0.22	1.04
2018-08-17	09:04:00	2018-08-17 09:04:00	74.734	-95.1423	-1.18	29.73	3.08	1436.4	0.21	1.05
2018-08-17	09:05:00	2018-08-17 09:05:00	74.734	-95.1425	-1.18	29.73	3.13	1436.36	0.23	1.01
2018-08-17	09:06:00	2018-08-17 09:06:00	74.734	-95.1427	-1.19	29.73	3.18	1436.32	0.41	1.04
2018-08-17	09:07:00	2018-08-17 09:07:00	74.7339	-95.1427	-1.19	29.73	3.13	1436.36	0.48	1.04
2018-08-17	09:08:00	2018-08-17 09:08:00	74.7338	-95.1429	-1.2	29.74	3.08	1436.34	0.36	1.03
2018-08-17	09:09:00	2018-08-17 09:09:00	74.7339	-95.1431	-1.19	29.75	3.13	1436.35	0.27	1.05
2018-08-17	09:10:00	2018-08-17 09:10:00	74.7339	-95.1433	-1.19	29.76	3.15	1436.37	0.23	1.05
2018-08-17	09:11:00	2018-08-17 09:11:00	74.7339	-95.1435	-1.19	29.77	3.14	1436.41	0.27	1.05
2018-08-17	09:12:00	2018-08-17 09:12:00	74.7339	-95.1438	-1.18	29.79	3.12	1436.46	0.25	1.05
2018-08-17	09:13:00	2018-08-17 09:13:00	74.7339	-95.1439	-1.18	29.8	3.22	1436.48	0.27	1.05
2018-08-17	09:14:00	2018-08-17 09:14:00	74.7339	-95.1441	-1.18	29.81	3.27	1436.5	0.31	1.04
2018-08-17	09:15:00	2018-08-17 09:15:00	74.7339	-95.1443	-1.18	29.82	3.21	1436.51	0.24	1.06
2018-08-17	09:16:00	2018-08-17 09:16:00	74.7339	-95.1445	-1.18	29.83	3.23	1436.48	0.3	1.05
2018-08-17	09:17:00	2018-08-17 09:17:00	74.734	-95.1449	-1.18	29.83	3.23	1436.47	0.3	1.05
2018-08-17	09:18:00	2018-08-17 09:18:00	74.734	-95.145	-1.19	29.82	3.18	1436.47	0.25	1.05
2018-08-17	09:19:00	2018-08-17 09:19:00	74.734	-95.1453	-1.19	29.81	3.27	1436.43	0.3	1.05
2018-08-17	09:20:00	2018-08-17 09:20:00	74.734	-95.1455	-1.19	29.81	3.24	1436.43	0.26	1.04
2018-08-17	09:21:00	2018-08-17 09:21:00	74.734	-95.1456	-1.19	29.81	3.25	1436.43	0.33	1.05
2018-08-17	09:22:00	2018-08-17 09:22:00	74.734	-95.146	-1.19	29.82	3.16	1436.41	0.31	1.05
2018-08-17	09:23:00	2018-08-17 09:23:00	74.734	-95.1461	-1.19	29.82	3.25	1436.41	0.25	1.02
2018-08-17	09:24:00	2018-08-17 09:24:00	74.734	-95.1463	-1.19	29.82	3.26	1436.45	0.22	1.05
2018-08-17	09:25:00	2018-08-17 09:25:00	74.734	-95.1464	-1.19	29.83	3.31	1436.43	0.18	1.04
2018-08-17	09:26:00	2018-08-17 09:26:00	74.734	-95.1465	-1.19	29.83	3.31	1436.44	0.23	1.05
2018-08-17	09:27:00	2018-08-17 09:27:00	74.7341	-95.1467	-1.19	29.83	3.29	1436.44	0.24	1.04
2018-08-17	09:28:00	2018-08-17 09:28:00	74.7341	-95.1469	-1.2	29.83	3.39	1436.44	0.21	1.04
2018-08-17	09:29:00	2018-08-17 09:29:00	74.7341	-95.147	-1.2	29.83	3.32	1436.4	0.17	1.04
2018-08-17	09:30:00	2018-08-17 09:30:00	74.7341	-95.1471	-1.21	29.83	3.36	1436.37	0.18	1.04
2018-08-17	09:31:00	2018-08-17 09:31:00	74.734	-95.1471	-1.21	29.83	3.37	1436.36	0.21	1.04
2018-08-17	09:32:00	2018-08-17 09:32:00	74.7341	-95.1473	-1.21	29.83	3.35	1436.35	0.2	1.04
2018-08-17	09:33:00	2018-08-17 09:33:00	74.7341	-95.1475	-1.22	29.83	3.32	1436.33	0.23	1.05
2018-08-17	09:34:00	2018-08-17 09:34:00	74.7341	-95.1477	-1.22	29.83	3.28	1436.32	0.27	1.05
2018-08-17	09:35:00	2018-08-17 09:35:00	74.734	-95.1479	-1.22	29.83	3.27	1436.3	0.23	1.05
2018-08-17	09:36:00	2018-08-17 09:36:00	74.734	-95.1481	-1.24	29.82	3.33	1436.24	0.22	1.05
2018-08-17	09:37:00	2018-08-17 09:37:00	74.734	-95.1481	-1.24	29.81	3.27	1436.18	0.21	1.04
2018-08-17	09:38:00	2018-08-17 09:38:00	74.734	-95.1482	-1.24	29.8	3.33	1436.18	0.25	1.03
2018-08-17	09:39:00	2018-08-17 09:39:00	74.7339	-95.1482	-1.23	29.81	3.28	1436.24	0.33	1.05
2018-08-17	09:40:00	2018-08-17 09:40:00	74.7339	-95.1485	-1.22	29.83	3.23	1436.3	0.28	1.05
2018-08-17	09:41:00	2018-08-17 09:41:00	74.7339	-95.1487	-1.22	29.83	3.29	1436.35	0.24	1.06
2018-08-17	09:42:00	2018-08-17 09:42:00	74.7338	-95.1487	-1.21	29.84	3.31	1436.36	0.24	1.06
2018-08-17	09:43:00	2018-08-17 09:43:00	74.7338	-95.1488	-1.21	29.83	3.33	1436.36	0.23	1.04
2018-08-17	09:44:00	2018-08-17 09:44:00	74.7338	-95.149	-1.21	29.84	3.35	1436.37	0.18	1.04
2018-08-17	09:45:00	2018-08-17 09:45:00	74.7338	-95.1489	-1.22	29.83	3.36	1436.32	0.17	1.05
2018-08-17	09:46:00	2018-08-17 09:46:00	74.7338	-95.1491	-1.23	29.82	3.36	1436.27	0.2	1.05
2018-08-17	09:47:00	2018-08-17 09:47:00	74.7338	-95.1493	-1.24	29.81	3.35	1436.18	0.16	1.04
2018-08-17	09:48:00	2018-08-17 09:48:00	74.7338	-95.1493	-1.24	29.8	3.37	1436.16	0.11	1.04
2018-08-17	09:49:00	2018-08-17 09:49:00	74.7338	-95.1494	-1.24	29.8	3.33	1436.16	0.15	1.04
2018-08-17	09:50:00	2018-08-17 09:50:00	74.7337	-95.1493	-1.25	29.8	3.32	1436.15	0.21	1.05
2018-08-17	09:51:00	2018-08-17 09:51:00	74.7337	-95.1493	-1.25	29.79	3.12	1436.13	0.19	1.05
2018-08-17	09:52:00	2018-08-17 09:52:00	74.7337	-95.1494	-1.24	29.79	3.16	1436.13	0.26	1.05
2018-08-17	09:53:00	2018-08-17 09:53:00	74.7336	-95.1493	-1.24	29.8	3.23	1436.18	0.31	1.05
2018-08-17	09:54:00	2018-08-17 09:54:00	74.7336	-95.1496	-1.22	29.82	3.21	1436.29	0.38	1.05
2018-08-17	09:55:00	2018-08-17 09:55:00	74.7336	-95.1501	-1.22	29.83	3.23	1436.32	0.39	1.05
2018-08-17	09:56:00	2018-08-17 09:56:00	74.7336	-95.1502	-1.21	29.84	3.23	1436.35	0.22	1.05
2018-08-17	09:57:00	2018-08-17 09:57:00	74.7337	-95.1503	-1.21	29.84	3.35	1436.37	0.24	1.06
2018-08-17	09:58:00	2018-08-17 09:58:00	74.7337	-95.1502	-1.21	29.85	3.31	1436.4	0.23	1.05
2018-08-17	09:59:00	2018-08-17 09:59:00	74.7337	-95.1502	-1.21	29.85	3.32	1436.39	0.15	1.05
2018-08-17	10:00:00	2018-08-17 10:00:00	74.7336	-95.1502	-1.22	29.84	3.32	1436.36	0.26	1.05
2018-08-17	10:01:00	2018-08-17 10:01:00	74.7337	-95.1506	-1.22	29.81	3.25	1436.28	0.27	1.05
2018-08-17	10:02:00	2018-08-17 10:02:00	74.7337	-95.1507	-1.22	29.8	3.24	1436.25	0.2	1.06
2018-08-17	10:03:00	2018-08-17 10:03:00	74.7336	-95.1509	-1.23	29.79	3.18	1436.24	0.17	1.05
2018-08-17	10:04:00	2018-08-17 10:04:00	74.7336	-95.1509	-1.23	29.79	3.14	1436.23	0.16	1.06
2018-08-17	10:05:00	2018-08-17 10:05:00	74.7336	-95.151	-1.22	29.8	3.24	1436.25	0.18	1.06
2018-08-17	10:06:00	2018-08-17 10:06:00	74.7337	-95.1511	-1.23	29.8	3.15	1436.26	0.11	1.06
2018-08-17	10:07:00	2018-08-17 10:07:00	74.7337	-95.151	-1.23	29.81	3.24	1436.27	0.11	1.06
2018-08-17	10:08:00	2018-08-17 10:08:00	74.7337	-95.1512	-1.23	29.81	3.25	1436.25	0.27	1.06
2018-08-17	10:09:00	2018-08-17 10:09:00	74.7337	-95.1516	-1.23	29.81	3.17	1436.24	0.32	1.06
2018-08-17	10:10:00	2018-08-17 10:10:00	74.7337	-95.1518	-1.23	29.8	3.24	1436.24	0.29	1.05
2018-08-17	10:11:00	2018-08-17 10:11:00	74.7337	-95.1521	-1.22	29.81	3.28	1436.29	0.25	1.05
2018-08-17	10:12:00	2018-08-17 10:12:00	74.7337	-95.1522	-1.22	29.83	3.23	1436.35	0.26	1.05
2018-08-17	10:13:00	2018-08-17 10:13:00	74.7337	-95.1525	-1.23	29.83	3.27	1436.3	0.28	1.05
2018-08-17	10:14:00	2018-08-17 10:14:00	74.7337	-95.1527	-1.23	29.82	3.26	1436.27	0.24	1.05
2018-08-17	10:15:00	2018-08-17 10:15:00	74.7338	-95.1529	-1.23	29.82	3.27	1436.25	0.23	1.05
2018-08-17	10:16:00	2018-08-17 10:16:00	74.7338	-95.1531	-1.23	29.82	3.22	1436.24	0.27	1.04
2018-08-17	10:17:00	2018-08-17 10:17:00	74.7338	-95.1535	-1.23	29.82	3.25	1436.25	0.24	1.04
2018-08-17	10:18:00	2018-08-17 10:18:00	74.7338	-95.1536	-1.23	29.82	3.23	1436.28	0.14	1.05
2018-08-17	10:19:00	2018-08-17 10:19:00	74.7338	-95.1536	-1.23	29.83	3.27	1436.27	0.05	1.05
2018-08-17	10:20:00	2018-08-17 10:20:00	74.7338	-95.1536	-1.23	29.82	3.22	1436.24	0.03	1.05
2018-08-17	10:21:00	2018-08-17 10:21:00	74.7338	-95.1536	-1.24	29.82	3.28	1436.19	0.05	1.05
2018-08-17	10:22:00	2018-08-17 10:22:00	74.7338	-95.1536	-1.25	29.81	3.21	1436.15	0.07	1.05
2018-08-17	10:23:00	2018-08-17 10:23:00	74.7338	-95.1535	-1.25	29.8	3.15	1436.1	0.03	1.06
2018-08-17	10:24:00	2018-08-17 10:24:00	74.7339	-95.1535	-1.25	29.79	3.19	1436.09	0.03	1.06
2018-08-17	10:25:00	2018-08-17 10:25:00	74.7339	-95.1535	-1.26	29.79	3.13	1436.07	0.05	1.06
2018-08-17	10:26:00	2018-08-17 10:26:00	74.7339	-95.1536	-1.25	29.78	3.16	1436.07	0.06	1.06
2018-08-17	10:27:00	2018-08-17 10:27:00	74.7339	-95.1535	-1.25	29.78	3.1	1436.08	0.04	1.06
2018-08-17	10:28:00	2018-08-17 10:28:00	74.7339	-95.1535	-1.25	29.78	3.03	1436.08	0.04	1.06
2018-08-17	10:29:00	2018-08-17 10:29:00	74.7339	-95.1535	-1.25	29.78	3.11	1436.11	0.07	1.06
2018-08-17	10:30:00	2018-08-17 10:30:00	74.7339	-95.1535	-1.24	29.78	3.03	1436.14	0.08	1.06
2018-08-17	10:31:00	2018-08-17 10:31:00	74.7339	-95.1535	-1.24	29.78	3.11	1436.16	0.07	1.06
2018-08-17	10:32:00	2018-08-17 10:32:00	74.7339	-95.1535	-1.24	29.78	3.09	1436.15	0.08	1.07
2018-08-17	10:33:00	2018-08-17 10:33:00	74.7339	-95.1535	-1.24	29.78	3.11	1436.17	0.07	1.06
2018-08-17	10:34:00	2018-08-17 10:34:00	74.7339	-95.1535	-1.23	29.78	3.16	1436.18	0.09	1.06
2018-08-17	10:35:00	2018-08-17 10:35:00	74.734	-95.1534	-1.24	29.79	3.18	1436.18	0.17	1.06
2018-08-17	10:36:00	2018-08-17 10:36:00	74.734	-95.1534	-1.24	29.79	3.12	1436.17	0.17	1.06
2018-08-17	10:37:00	2018-08-17 10:37:00	74.7341	-95.1533	-1.24	29.79	3.17	1436.18	0.17	1.04
2018-08-17	10:38:00	2018-08-17 10:38:00	74.7341	-95.1534	-1.24	29.79	3.2	1436.15	0.19	1.06
2018-08-17	10:39:00	2018-08-17 10:39:00	74.7342	-95.1533	-1.24	29.78	3.17	1436.15	0.14	1.06
2018-08-17	10:40:00	2018-08-17 10:40:00	74.7342	-95.1533	-1.24	29.79	3.22	1436.16	0.1	1.05
2018-08-17	10:41:00	2018-08-17 10:41:00	74.7342	-95.1532	-1.24	29.79	3.26	1436.16	0.07	1.05
2018-08-17	10:42:00	2018-08-17 10:42:00	74.7342	-95.1532	-1.25	29.79	3.18	1436.14	0.07	1.05
2018-08-17	10:43:00	2018-08-17 10:43:00	74.7343	-95.1532	-1.26	29.78	3.21	1436.09	0.06	1.05
2018-08-17	10:44:00	2018-08-17 10:44:00	74.7343	-95.1531	-1.26	29.77	3.23	1436.03	0.04	1.06
2018-08-17	10:45:00	2018-08-17 10:45:00	74.7343	-95.1532	-1.26	29.76	3.19	1436.03	0.05	1.06
2018-08-17	10:46:00	2018-08-17 10:46:00	74.7343	-95.1531	-1.26	29.76	3.22	1436.05	0.06	1.06
2018-08-17	10:47:00	2018-08-17 10:47:00	74.7343	-95.1532	-1.25	29.76	3.14	1436.06	0.08	1.06
2018-08-17	10:48:00	2018-08-17 10:48:00	74.7343	-95.1532	-1.24	29.77	3.18	1436.1	0.09	1.02
2018-08-17	10:49:00	2018-08-17 10:49:00	74.7342	-95.1532	-1.24	29.78	3.14	1436.18	0.07	1.06
2018-08-17	10:50:00	2018-08-17 10:50:00	74.7342	-95.1532	-1.24	29.79	3.21	1436.18	0.04	1.04
2018-08-17	10:51:00	2018-08-17 10:51:00	74.7342	-95.1533	-1.23	29.81	3.19	1436.24	0.05	1.06
2018-08-17	10:52:00	2018-08-17 10:52:00	74.7342	-95.1533	-1.23	29.81	3.22	1436.25	0.07	1.05
2018-08-17	10:53:00	2018-08-17 10:53:00	74.7342	-95.1532	-1.23	29.82	3.22	1436.28	0.09	1.05
2018-08-17	10:54:00	2018-08-17 10:54:00	74.7342	-95.1531	-1.22	29.83	3.32	1436.32	0.14	1.05
2018-08-17	10:55:00	2018-08-17 10:55:00	74.7343	-95.153	-1.2	29.84	3.26	1436.41	0.18	1.06
2018-08-17	10:56:00	2018-08-17 10:56:00	74.7343	-95.1529	-1.2	29.85	3.26	1436.43	0.19	1.05
2018-08-17	10:57:00	2018-08-17 10:57:00	74.7344	-95.1529	-1.19	29.86	3.27	1436.49	0.17	1.05
2018-08-17	10:58:00	2018-08-17 10:58:00	74.7344	-95.1528	-1.17	29.87	3.18	1436.57	0.1	1.04
2018-08-17	10:59:00	2018-08-17 10:59:00	74.7344	-95.1528	-1.16	29.88	3.26	1436.68	0.07	1.05
2018-08-17	11:00:00	2018-08-17 11:00:00	74.7344	-95.1529	-1.15	29.9	3.28	1436.74	0.09	1.04
2018-08-17	11:01:00	2018-08-17 11:01:00	74.7344	-95.153	-1.13	29.9	3.28	1436.81	0.15	1.05
2018-08-17	11:02:00	2018-08-17 11:02:00	74.7344	-95.1531	-1.12	29.91	3.28	1436.88	0.2	1.04
2018-08-17	11:03:00	2018-08-17 11:03:00	74.7343	-95.1531	-1.1	29.92	3.29	1436.97	0.21	1.05
2018-08-17	11:04:00	2018-08-17 11:04:00	74.7342	-95.1532	-1.09	29.93	3.31	1437.05	0.19	1.05
2018-08-17	11:05:00	2018-08-17 11:05:00	74.7342	-95.1533	-1.08	29.94	3.29	1437.11	0.15	1.03
2018-08-17	11:06:00	2018-08-17 11:06:00	74.7342	-95.1532	-1.07	29.94	3.31	1437.17	0.26	1.05
2018-08-17	11:07:00	2018-08-17 11:07:00	74.7343	-95.1529	-1.05	29.95	3.32	1437.23	0.5	1.05
2018-08-17	11:08:00	2018-08-17 11:08:00	74.7344	-95.1525	-1.05	29.95	3.35	1437.28	0.67	1.06
2018-08-17	11:09:00	2018-08-17 11:09:00	74.7346	-95.152	-1.05	29.95	3.33	1437.3	0.62	1.04
2018-08-17	11:10:00	2018-08-17 11:10:00	74.7348	-95.1518	-1.04	29.96	3.42	1437.33	0.41	1.04
2018-08-17	11:11:00	2018-08-17 11:11:00	74.7348	-95.152	-1.03	29.96	3.4	1437.36	0.56	1.04
2018-08-17	11:12:00	2018-08-17 11:12:00	74.7346	-95.1525	-1.03	29.96	3.44	1437.38	1	1.04
2018-08-17	11:13:00	2018-08-17 11:13:00	74.7343	-95.1531	-1.03	29.96	3.41	1437.4	1.03	1.05
2018-08-17	11:14:00	2018-08-17 11:14:00	74.7341	-95.1535	-1.03	29.97	3.37	1437.42	0.63	1.06
2018-08-17	11:15:00	2018-08-17 11:15:00	74.734	-95.1536	-1.03	29.98	3.31	1437.41	0.31	1.03
2018-08-17	11:16:00	2018-08-17 11:16:00	74.7341	-95.1536	-1.03	29.98	3.46	1437.43	0.58	1.06
2018-08-17	11:17:00	2018-08-17 11:17:00	74.7343	-95.1531	-1.03	29.98	3.44	1437.44	1.02	1.06
2018-08-17	11:18:00	2018-08-17 11:18:00	74.7346	-95.1526	-1.02	29.99	3.41	1437.46	0.92	1.05
2018-08-17	11:19:00	2018-08-17 11:19:00	74.7348	-95.1522	-1.02	29.98	3.39	1437.45	0.54	1.05
2018-08-17	11:20:00	2018-08-17 11:20:00	74.7348	-95.1523	-1.02	29.98	3.3	1437.47	0.61	1.04
2018-08-17	11:21:00	2018-08-17 11:21:00	74.7346	-95.1527	-1.02	29.98	3.37	1437.47	1.04	1.04
2018-08-17	11:22:00	2018-08-17 11:22:00	74.7343	-95.1532	-1.02	29.98	3.37	1437.48	1.04	1.04
2018-08-17	11:23:00	2018-08-17 11:23:00	74.734	-95.1535	-1.02	29.98	3.47	1437.48	0.63	1.05
2018-08-17	11:24:00	2018-08-17 11:24:00	74.734	-95.1537	-1.03	29.99	3.32	1437.47	0.35	1.05
2018-08-17	11:25:00	2018-08-17 11:25:00	74.734	-95.1538	-1.03	29.99	3.24	1437.46	0.63	1.06
2018-08-17	11:26:00	2018-08-17 11:26:00	74.7343	-95.1533	-1.03	30	3.29	1437.45	1.04	1.06
2018-08-17	11:27:00	2018-08-17 11:27:00	74.7346	-95.1527	-1.03	30	3.29	1437.46	0.97	1.05
2018-08-17	11:28:00	2018-08-17 11:28:00	74.7348	-95.1524	-1.02	30	3.21	1437.48	0.57	1.05
2018-08-17	11:29:00	2018-08-17 11:29:00	74.7348	-95.1523	-1.02	30	3.12	1437.49	0.48	1.04
2018-08-17	11:30:00	2018-08-17 11:30:00	74.7347	-95.1527	-1.02	30	3.23	1437.49	0.88	1.05
2018-08-17	11:31:00	2018-08-17 11:31:00	74.7344	-95.1533	-1.02	30	3.23	1437.49	1.01	1.04
2018-08-17	11:32:00	2018-08-17 11:32:00	74.7342	-95.1537	-1.03	30	3.17	1437.49	0.69	1.05
2018-08-17	11:33:00	2018-08-17 11:33:00	74.7341	-95.1539	-1.03	30	3.17	1437.47	0.34	1.06
2018-08-17	11:34:00	2018-08-17 11:34:00	74.7341	-95.154	-1.03	30.01	3.2	1437.46	0.43	1.06
2018-08-17	11:35:00	2018-08-17 11:35:00	74.7343	-95.1536	-1.03	30.01	3.17	1437.48	0.86	1.06
2018-08-17	11:36:00	2018-08-17 11:36:00	74.7345	-95.1531	-1.03	30.01	3.22	1437.48	0.97	1.05
2018-08-17	11:37:00	2018-08-17 11:37:00	74.7348	-95.1527	-1.03	30.01	3.26	1437.49	0.67	1.05
2018-08-17	11:38:00	2018-08-17 11:38:00	74.7349	-95.1526	-1.02	30.01	3.28	1437.49	0.5	1.05
2018-08-17	11:39:00	2018-08-17 11:39:00	74.7347	-95.153	-1.02	30.01	3.33	1437.5	0.87	1.04
2018-08-17	11:40:00	2018-08-17 11:40:00	74.7345	-95.154	-1.02	30.01	3.31	1437.49	1.19	1.04
2018-08-17	11:41:00	2018-08-17 11:41:00	74.7343	-95.1549	-1.02	30.01	3.18	1437.49	0.86	1.05
2018-08-17	11:42:00	2018-08-17 11:42:00	74.7343	-95.1554	-1.03	30.01	3.15	1437.49	0.42	1.06
2018-08-17	11:43:00	2018-08-17 11:43:00	74.7343	-95.1555	-1.02	30.01	3.13	1437.49	0.52	1.06
2018-08-17	11:44:00	2018-08-17 11:44:00	74.7345	-95.1552	-1.02	30.01	3.2	1437.5	0.97	1.06
2018-08-17	11:45:00	2018-08-17 11:45:00	74.7348	-95.1547	-1.02	30.02	3.27	1437.5	1.05	1.05
2018-08-17	11:46:00	2018-08-17 11:46:00	74.735	-95.1543	-1.02	30.01	3.07	1437.49	0.69	1.05
2018-08-17	11:47:00	2018-08-17 11:47:00	74.7351	-95.1541	-1.02	30.01	3.02	1437.5	0.42	1.06
2018-08-17	11:48:00	2018-08-17 11:48:00	74.7351	-95.1542	-1.02	30.01	3.2	1437.5	0.68	1.04
2018-08-17	11:49:00	2018-08-17 11:49:00	74.7348	-95.1548	-1.02	30.01	3.16	1437.5	0.98	1.04
2018-08-17	11:50:00	2018-08-17 11:50:00	74.7346	-95.1552	-1.02	30.01	3.21	1437.51	0.77	1.05
2018-08-17	11:51:00	2018-08-17 11:51:00	74.7344	-95.1555	-1.02	30.01	3.1	1437.49	0.43	1.05
2018-08-17	11:52:00	2018-08-17 11:52:00	74.7344	-95.1557	-1.03	30.02	3.04	1437.48	0.27	1.05
2018-08-17	11:53:00	2018-08-17 11:53:00	74.7345	-95.1558	-1.03	30.02	3.11	1437.48	0.53	1.06
2018-08-17	11:54:00	2018-08-17 11:54:00	74.7346	-95.1553	-1.02	30.02	3.1	1437.49	0.88	1.06
2018-08-17	11:55:00	2018-08-17 11:55:00	74.7349	-95.1547	-1.03	30.02	3.25	1437.49	0.87	1.05
2018-08-17	11:56:00	2018-08-17 11:56:00	74.735	-95.1543	-1.03	30.02	3.16	1437.48	0.56	1.05
2018-08-17	11:57:00	2018-08-17 11:57:00	74.7351	-95.1543	-1.02	30.02	3.21	1437.49	0.49	1.04
2018-08-17	11:58:00	2018-08-17 11:58:00	74.735	-95.1548	-1.02	30.02	3.23	1437.5	0.81	1.04
2018-08-17	11:59:00	2018-08-17 11:59:00	74.7348	-95.1556	-1.03	30.02	3.25	1437.49	0.91	1.05
2018-08-17	12:00:00	2018-08-17 12:00:00	74.7347	-95.1563	-1.03	30.02	3.27	1437.48	0.57	1.05
2018-08-17	12:01:00	2018-08-17 12:01:00	74.7346	-95.1565	-1.03	30.02	3.28	1437.46	0.26	1.06
2018-08-17	12:02:00	2018-08-17 12:02:00	74.7347	-95.1565	-1.04	30.02	3.31	1437.46	0.43	1.05
2018-08-17	12:03:00	2018-08-17 12:03:00	74.7348	-95.156	-1.04	30.02	3.4	1437.44	0.78	1.06
2018-08-17	12:04:00	2018-08-17 12:04:00	74.735	-95.1555	-1.04	30.01	3.35	1437.42	0.82	1.06
2018-08-17	12:05:00	2018-08-17 12:05:00	74.7352	-95.155	-1.04	30.01	3.45	1437.41	0.53	1.05
2018-08-17	12:06:00	2018-08-17 12:06:00	74.7353	-95.155	-1.04	30.02	3.38	1437.42	0.42	1.04
2018-08-17	12:07:00	2018-08-17 12:07:00	74.7352	-95.1554	-1.04	30.02	3.51	1437.43	0.7	1.05
2018-08-17	12:08:00	2018-08-17 12:08:00	74.735	-95.1559	-1.04	30.02	3.48	1437.43	0.82	1.05
2018-08-17	12:09:00	2018-08-17 12:09:00	74.7348	-95.1563	-1.04	30.02	3.5	1437.41	0.62	1.05
2018-08-17	12:10:00	2018-08-17 12:10:00	74.7347	-95.1565	-1.05	30.02	3.46	1437.39	0.35	1.05
2018-08-17	12:11:00	2018-08-17 12:11:00	74.7347	-95.1567	-1.05	30.02	3.51	1437.39	0.24	1.06
2018-08-17	12:12:00	2018-08-17 12:12:00	74.7348	-95.1567	-1.05	30.02	3.36	1437.39	0.48	1.03
2018-08-17	12:13:00	2018-08-17 12:13:00	74.7349	-95.1561	-1.05	30.02	3.47	1437.41	0.79	1.06
2018-08-17	12:14:00	2018-08-17 12:14:00	74.7351	-95.1556	-1.05	30.02	3.53	1437.4	0.82	1.06
2018-08-17	12:15:00	2018-08-17 12:15:00	74.7353	-95.1551	-1.04	30.02	3.53	1437.4	0.56	1.05
2018-08-17	12:16:00	2018-08-17 12:16:00	74.7354	-95.155	-1.04	30.02	3.5	1437.41	0.44	1.05
2018-08-17	12:17:00	2018-08-17 12:17:00	74.7352	-95.1553	-1.04	30.02	3.41	1437.43	0.73	1.04
2018-08-17	12:18:00	2018-08-17 12:18:00	74.735	-95.1558	-1.04	30.02	3.46	1437.43	0.94	1.05
2018-08-17	12:19:00	2018-08-17 12:19:00	74.7348	-95.1563	-1.04	30.02	3.46	1437.41	0.73	1.05
2018-08-17	12:20:00	2018-08-17 12:20:00	74.7347	-95.1566	-1.04	30.02	3.58	1437.39	0.38	1.05
2018-08-17	12:21:00	2018-08-17 12:21:00	74.7347	-95.1567	-1.05	30.01	3.31	1437.38	0.25	1.06
2018-08-17	12:22:00	2018-08-17 12:22:00	74.7347	-95.1568	-1.05	30.01	3.47	1437.38	0.5	1.06
2018-08-17	12:23:00	2018-08-17 12:23:00	74.7349	-95.1563	-1.04	30	3.47	1437.39	0.8	1.05
2018-08-17	12:24:00	2018-08-17 12:24:00	74.7351	-95.1557	-1.04	30	3.41	1437.39	0.87	1.06
2018-08-17	12:25:00	2018-08-17 12:25:00	74.7352	-95.1552	-1.04	30	3.46	1437.39	0.63	1.05
2018-08-17	12:26:00	2018-08-17 12:26:00	74.7354	-95.1551	-1.04	30	3.49	1437.39	0.48	1.05
2018-08-17	12:27:00	2018-08-17 12:27:00	74.7353	-95.1554	-1.04	30	3.41	1437.41	0.75	1.02
2018-08-17	12:28:00	2018-08-17 12:28:00	74.735	-95.1559	-1.04	30	3.43	1437.41	0.92	1.05
2018-08-17	12:29:00	2018-08-17 12:29:00	74.7348	-95.1563	-1.05	30	3.49	1437.36	0.69	1.03
2018-08-17	12:30:00	2018-08-17 12:30:00	74.7347	-95.1566	-1.05	29.99	3.48	1437.33	0.35	1.06
2018-08-17	12:31:00	2018-08-17 12:31:00	74.7347	-95.1568	-1.06	29.98	3.38	1437.3	0.25	1.05
2018-08-17	12:32:00	2018-08-17 12:32:00	74.7347	-95.1569	-1.06	29.97	3.48	1437.29	0.47	1.06
2018-08-17	12:33:00	2018-08-17 12:33:00	74.7349	-95.1564	-1.05	29.97	3.42	1437.32	0.72	1.06
2018-08-17	12:34:00	2018-08-17 12:34:00	74.7351	-95.1559	-1.05	29.97	3.38	1437.3	0.77	1.06
2018-08-17	12:35:00	2018-08-17 12:35:00	74.7352	-95.1555	-1.05	29.97	3.46	1437.29	0.54	1.05
2018-08-17	12:36:00	2018-08-17 12:36:00	74.7353	-95.1554	-1.05	29.97	3.44	1437.29	0.43	1.05
2018-08-17	12:37:00	2018-08-17 12:37:00	74.7352	-95.1556	-1.05	29.97	3.5	1437.3	0.71	1.05
2018-08-17	12:38:00	2018-08-17 12:38:00	74.735	-95.156	-1.05	29.97	3.46	1437.29	0.86	1.05
2018-08-17	12:39:00	2018-08-17 12:39:00	74.7348	-95.1564	-1.05	29.97	3.49	1437.29	0.65	1.05
2018-08-17	12:40:00	2018-08-17 12:40:00	74.7347	-95.1566	-1.06	29.96	3.44	1437.27	0.37	1.06
2018-08-17	12:41:00	2018-08-17 12:41:00	74.7347	-95.1568	-1.06	29.96	3.38	1437.24	0.3	1.06
2018-08-17	12:42:00	2018-08-17 12:42:00	74.7348	-95.1568	-1.06	29.95	3.4	1437.25	0.61	1.06
2018-08-17	12:43:00	2018-08-17 12:43:00	74.7349	-95.1562	-1.06	29.95	3.42	1437.26	0.88	1.06
2018-08-17	12:44:00	2018-08-17 12:44:00	74.7351	-95.1556	-1.06	29.95	3.43	1437.24	0.81	1.05
2018-08-17	12:45:00	2018-08-17 12:45:00	74.7353	-95.1552	-1.06	29.95	3.43	1437.24	0.53	1.05
2018-08-17	12:46:00	2018-08-17 12:46:00	74.7354	-95.1552	-1.05	29.95	3.49	1437.26	0.43	1.05
2018-08-17	12:47:00	2018-08-17 12:47:00	74.7353	-95.1553	-1.05	29.95	3.49	1437.26	0.61	1.05
2018-08-17	12:48:00	2018-08-17 12:48:00	74.7351	-95.1557	-1.06	29.95	3.41	1437.25	0.63	1.05
2018-08-17	12:49:00	2018-08-17 12:49:00	74.7349	-95.156	-1.06	29.95	3.44	1437.22	0.42	1.03
2018-08-17	12:50:00	2018-08-17 12:50:00	74.7349	-95.1561	-1.06	29.94	3.36	1437.22	0.21	1.06
2018-08-17	12:51:00	2018-08-17 12:51:00	74.7349	-95.1562	-1.06	29.94	3.43	1437.21	0.26	1.06
2018-08-17	12:52:00	2018-08-17 12:52:00	74.735	-95.1564	-1.07	29.93	3.46	1437.2	0.36	1.07
2018-08-17	12:53:00	2018-08-17 12:53:00	74.7351	-95.1563	-1.06	29.93	3.44	1437.21	0.35	1.06
2018-08-17	12:54:00	2018-08-17 12:54:00	74.7351	-95.156	-1.07	29.93	3.45	1437.19	0.32	1.05
2018-08-17	12:55:00	2018-08-17 12:55:00	74.7352	-95.1558	-1.07	29.93	3.51	1437.18	0.28	1.05
2018-08-17	12:56:00	2018-08-17 12:56:00	74.7352	-95.1558	-1.06	29.93	3.47	1437.21	0.27	1.05
2018-08-17	12:57:00	2018-08-17 12:57:00	74.7352	-95.156	-1.06	29.93	3.54	1437.21	0.38	1.05
2018-08-17	12:58:00	2018-08-17 12:58:00	74.7351	-95.1562	-1.06	29.93	3.45	1437.19	0.47	1.05
2018-08-17	12:59:00	2018-08-17 12:59:00	74.7349	-95.1565	-1.06	29.93	3.37	1437.2	0.43	1.05
2018-08-17	13:00:00	2018-08-17 13:00:00	74.7348	-95.1567	-1.07	29.93	3.36	1437.19	0.23	1.06
2018-08-17	13:01:00	2018-08-17 13:01:00	74.7348	-95.1567	-1.07	29.93	3.35	1437.19	0.15	1.06
2018-08-17	13:02:00	2018-08-17 13:02:00	74.7349	-95.1567	-1.07	29.93	3.42	1437.18	0.3	1.06
2018-08-17	13:03:00	2018-08-17 13:03:00	74.735	-95.1565	-1.06	29.93	3.39	1437.21	0.5	1.06
2018-08-17	13:04:00	2018-08-17 13:04:00	74.7351	-95.1561	-1.06	29.93	3.5	1437.21	0.59	1.06
2018-08-17	13:05:00	2018-08-17 13:05:00	74.7353	-95.1558	-1.06	29.94	3.55	1437.21	0.51	1.06
2018-08-17	13:06:00	2018-08-17 13:06:00	74.7354	-95.1556	-1.06	29.94	3.46	1437.22	0.3	1.05
2018-08-17	13:07:00	2018-08-17 13:07:00	74.7353	-95.1554	-1.06	29.94	3.58	1437.22	0.27	1.05
2018-08-17	13:08:00	2018-08-17 13:08:00	74.7352	-95.1554	-1.06	29.94	3.44	1437.21	0.39	1.05
2018-08-17	13:09:00	2018-08-17 13:09:00	74.7351	-95.1557	-1.05	29.94	3.47	1437.24	0.46	1.05
2018-08-17	13:10:00	2018-08-17 13:10:00	74.735	-95.1559	-1.06	29.94	3.37	1437.23	0.45	1.05
2018-08-17	13:11:00	2018-08-17 13:11:00	74.7349	-95.1559	-1.06	29.95	3.43	1437.23	0.33	1.05
2018-08-17	13:12:00	2018-08-17 13:12:00	74.735	-95.1558	-1.06	29.95	3.45	1437.22	0.28	1.05
2018-08-17	13:13:00	2018-08-17 13:13:00	74.735	-95.1557	-1.06	29.95	3.56	1437.23	0.34	1.05
2018-08-17	13:14:00	2018-08-17 13:14:00	74.7351	-95.1556	-1.06	29.95	3.43	1437.23	0.36	1.05
2018-08-17	13:15:00	2018-08-17 13:15:00	74.7352	-95.1555	-1.06	29.95	3.43	1437.22	0.28	1.05
2018-08-17	13:16:00	2018-08-17 13:16:00	74.7353	-95.1553	-1.07	29.95	3.5	1437.21	0.26	1.05
2018-08-17	13:17:00	2018-08-17 13:17:00	74.7353	-95.1552	-1.07	29.94	3.48	1437.17	0.28	1.05
2018-08-17	13:18:00	2018-08-17 13:18:00	74.7354	-95.1552	-1.07	29.94	3.54	1437.17	0.21	1.05
2018-08-17	13:19:00	2018-08-17 13:19:00	74.7354	-95.1551	-1.08	29.94	3.55	1437.14	0.17	1.05
2018-08-17	13:20:00	2018-08-17 13:20:00	74.7355	-95.155	-1.08	29.94	3.59	1437.11	0.16	1.05
2018-08-17	13:21:00	2018-08-17 13:21:00	74.7355	-95.1549	-1.09	29.94	3.59	1437.09	0.11	1.05
2018-08-17	13:22:00	2018-08-17 13:22:00	74.7355	-95.1548	-1.09	29.94	3.53	1437.1	0.09	1.05
2018-08-17	13:23:00	2018-08-17 13:23:00	74.7355	-95.1548	-1.09	29.94	3.58	1437.08	0.1	1.05
2018-08-17	13:24:00	2018-08-17 13:24:00	74.7355	-95.1547	-1.1	29.94	3.61	1437.06	0.06	1.05
2018-08-17	13:25:00	2018-08-17 13:25:00	74.7355	-95.1547	-1.1	29.94	3.52	1437.04	0.06	1.05
2018-08-17	13:26:00	2018-08-17 13:26:00	74.7355	-95.1546	-1.1	29.93	3.59	1437.03	0.1	1.05
2018-08-17	13:27:00	2018-08-17 13:27:00	74.7356	-95.1546	-1.1	29.94	3.59	1437.02	0.07	1.05
2018-08-17	13:28:00	2018-08-17 13:28:00	74.7356	-95.1545	-1.1	29.94	3.56	1437.03	0.07	1.05
2018-08-17	13:29:00	2018-08-17 13:29:00	74.7356	-95.1545	-1.09	29.94	3.7	1437.07	0.1	1.05
2018-08-17	13:30:00	2018-08-17 13:30:00	74.7356	-95.1544	-1.09	29.94	3.64	1437.07	0.1	1.04
2018-08-17	13:31:00	2018-08-17 13:31:00	74.7356	-95.1543	-1.09	29.95	3.65	1437.08	0.1	1.05
2018-08-17	13:32:00	2018-08-17 13:32:00	74.7356	-95.1542	-1.09	29.95	3.73	1437.08	0.1	1.05
2018-08-17	13:33:00	2018-08-17 13:33:00	74.7356	-95.1542	-1.09	29.95	3.77	1437.08	0.1	1.05
2018-08-17	13:34:00	2018-08-17 13:34:00	74.7356	-95.1541	-1.09	29.95	3.78	1437.08	0.1	1.05
2018-08-17	13:35:00	2018-08-17 13:35:00	74.7356	-95.154	-1.09	29.95	3.67	1437.08	0.05	1.05
2018-08-17	13:36:00	2018-08-17 13:36:00	74.7357	-95.154	-1.1	29.95	3.74	1437.06	0	1.05
2018-08-17	13:37:00	2018-08-17 13:37:00	74.7357	-95.154	-1.1	29.95	3.64	1437.05	0	1.05
2018-08-17	13:38:00	2018-08-17 13:38:00	74.7357	-95.154	-1.1	29.95	3.59	1437.03	0.05	1.05
2018-08-17	13:39:00	2018-08-17 13:39:00	74.7357	-95.154	-1.1	29.95	3.74	1437.02	0.05	1.03
2018-08-17	13:40:00	2018-08-17 13:40:00	74.7357	-95.154	-1.1	29.95	3.67	1437.04	0.03	1.05
2018-08-17	13:41:00	2018-08-17 13:41:00	74.7357	-95.154	-1.11	29.95	3.65	1437	0.07	1.05
2018-08-17	13:42:00	2018-08-17 13:42:00	74.7357	-95.154	-1.11	29.95	3.72	1436.98	0.08	1.05
2018-08-17	13:43:00	2018-08-17 13:43:00	74.7357	-95.1539	-1.11	29.95	3.72	1436.98	0.09	1.05
2018-08-17	13:44:00	2018-08-17 13:44:00	74.7357	-95.1539	-1.11	29.95	3.73	1436.97	0.07	1.05
2018-08-17	13:45:00	2018-08-17 13:45:00	74.7357	-95.1538	-1.11	29.95	3.67	1436.98	0.03	1.05
2018-08-17	13:46:00	2018-08-17 13:46:00	74.7357	-95.1538	-1.11	29.95	3.69	1436.99	0.02	1.05
2018-08-17	13:47:00	2018-08-17 13:47:00	74.7357	-95.1537	-1.11	29.95	3.69	1436.99	0.04	1.05
2018-08-17	13:48:00	2018-08-17 13:48:00	74.7357	-95.1538	-1.11	29.95	3.54	1437	0.05	1.05
2018-08-17	13:49:00	2018-08-17 13:49:00	74.7357	-95.1537	-1.11	29.95	3.68	1436.99	0.03	1.05
2018-08-17	13:50:00	2018-08-17 13:50:00	74.7357	-95.1538	-1.11	29.95	3.64	1436.99	0.07	1.04
2018-08-17	13:51:00	2018-08-17 13:51:00	74.7357	-95.1538	-1.11	29.95	3.54	1437.01	0.07	1.04
2018-08-17	13:52:00	2018-08-17 13:52:00	74.7357	-95.1538	-1.11	29.95	3.6	1437	0.07	1.05
2018-08-17	13:53:00	2018-08-17 13:53:00	74.7356	-95.1537	-1.12	29.95	3.65	1436.96	0.1	1.06
2018-08-17	13:54:00	2018-08-17 13:54:00	74.7357	-95.1536	-1.13	29.95	3.67	1436.94	0.1	1.06
2018-08-17	13:55:00	2018-08-17 13:55:00	74.7357	-95.1535	-1.12	29.95	3.64	1436.94	0.1	1.06
2018-08-17	13:56:00	2018-08-17 13:56:00	74.7357	-95.1535	-1.12	29.95	3.66	1436.95	0.07	1.05
2018-08-17	13:57:00	2018-08-17 13:57:00	74.7357	-95.1534	-1.12	29.95	3.68	1436.97	0.05	1.06
2018-08-17	13:58:00	2018-08-17 13:58:00	74.7357	-95.1535	-1.12	29.96	3.65	1436.98	0.08	1.06
2018-08-17	13:59:00	2018-08-17 13:59:00	74.7357	-95.1536	-1.11	29.96	3.61	1437	0.13	1.06
2018-08-17	14:00:00	2018-08-17 14:00:00	74.7357	-95.1537	-1.12	29.96	3.62	1436.98	0.15	1.06
2018-08-17	14:01:00	2018-08-17 14:01:00	74.7357	-95.1538	-1.12	29.96	3.69	1436.98	0.17	1.05
2018-08-17	14:02:00	2018-08-17 14:02:00	74.7356	-95.154	-1.13	29.96	3.6	1436.95	0.2	1.06
2018-08-17	14:03:00	2018-08-17 14:03:00	74.7356	-95.1542	-1.14	29.96	3.61	1436.88	0.2	1.05
2018-08-17	14:04:00	2018-08-17 14:04:00	74.7356	-95.1544	-1.14	29.96	3.63	1436.86	0.18	1.06
2018-08-17	14:05:00	2018-08-17 14:05:00	74.7356	-95.1545	-1.15	29.96	3.7	1436.83	0.13	1.06
2018-08-17	14:06:00	2018-08-17 14:06:00	74.7356	-95.1544	-1.15	29.95	3.58	1436.79	0.1	1.06
2018-08-17	14:07:00	2018-08-17 14:07:00	74.7356	-95.1543	-1.16	29.95	3.65	1436.78	0.1	1.05
2018-08-17	14:08:00	2018-08-17 14:08:00	74.7356	-95.1543	-1.16	29.95	3.68	1436.78	0.08	1.05
2018-08-17	14:09:00	2018-08-17 14:09:00	74.7356	-95.1542	-1.16	29.95	3.66	1436.78	0.08	1.05
2018-08-17	14:10:00	2018-08-17 14:10:00	74.7356	-95.1542	-1.16	29.95	3.61	1436.77	0.06	1.06
2018-08-17	14:11:00	2018-08-17 14:11:00	74.7356	-95.1541	-1.16	29.95	3.61	1436.76	0.03	1.06
2018-08-17	14:12:00	2018-08-17 14:12:00	74.7356	-95.1541	-1.17	29.95	3.62	1436.74	0.02	1.05
2018-08-17	14:13:00	2018-08-17 14:13:00	74.7356	-95.1541	-1.18	29.95	3.58	1436.7	0	1.05
2018-08-17	14:14:00	2018-08-17 14:14:00	74.7356	-95.154	-1.18	29.95	3.66	1436.68	0	1.06
2018-08-17	14:15:00	2018-08-17 14:15:00	74.7356	-95.154	-1.18	29.94	3.52	1436.65	0.01	1.06
2018-08-17	14:16:00	2018-08-17 14:16:00	74.7356	-95.154	-1.19	29.94	3.63	1436.63	0.03	1.05
2018-08-17	14:17:00	2018-08-17 14:17:00	74.7356	-95.154	-1.19	29.93	3.51	1436.6	0.02	1.05
2018-08-17	14:18:00	2018-08-17 14:18:00	74.7356	-95.154	-1.2	29.93	3.52	1436.58	0.01	1.05
2018-08-17	14:19:00	2018-08-17 14:19:00	74.7356	-95.154	-1.2	29.93	3.59	1436.56	0.02	1.05
2018-08-17	14:20:00	2018-08-17 14:20:00	74.7356	-95.154	-1.2	29.92	3.53	1436.55	0.05	1.06
2018-08-17	14:21:00	2018-08-17 14:21:00	74.7356	-95.154	-1.21	29.92	3.51	1436.49	0.06	1.05
2018-08-17	14:22:00	2018-08-17 14:22:00	74.7356	-95.154	-1.21	29.92	3.5	1436.47	0.1	1.06
2018-08-17	14:23:00	2018-08-17 14:23:00	74.7356	-95.1538	-1.22	29.92	3.5	1436.46	0.17	1.06
2018-08-17	14:24:00	2018-08-17 14:24:00	74.7356	-95.1536	-1.21	29.92	3.62	1436.48	0.2	1.06
2018-08-17	14:25:00	2018-08-17 14:25:00	74.7356	-95.1534	-1.21	29.92	3.61	1436.47	0.2	1.06
2018-08-17	14:26:00	2018-08-17 14:26:00	74.7357	-95.1532	-1.21	29.92	3.59	1436.47	0.18	1.06
2018-08-17	14:27:00	2018-08-17 14:27:00	74.7357	-95.1531	-1.21	29.92	3.66	1436.47	0.15	1.06
2018-08-17	14:28:00	2018-08-17 14:28:00	74.7357	-95.1531	-1.21	29.92	3.53	1436.47	0.12	1.07
2018-08-17	14:29:00	2018-08-17 14:29:00	74.7357	-95.153	-1.21	29.91	3.42	1436.46	0.06	1.06
2018-08-17	14:30:00	2018-08-17 14:30:00	74.7357	-95.1529	-1.21	29.91	3.49	1436.45	0.05	1.06
2018-08-17	14:31:00	2018-08-17 14:31:00	74.7357	-95.1529	-1.21	29.91	3.55	1436.47	0.07	1.06
2018-08-17	14:32:00	2018-08-17 14:32:00	74.7357	-95.1528	-1.21	29.91	3.48	1436.48	0.06	1.06
2018-08-17	14:33:00	2018-08-17 14:33:00	74.7357	-95.1528	-1.2	29.91	3.53	1436.5	0.07	1.06
2018-08-17	14:34:00	2018-08-17 14:34:00	74.7357	-95.1527	-1.2	29.91	3.47	1436.52	0.1	1.06
2018-08-17	14:35:00	2018-08-17 14:35:00	74.7357	-95.1526	-1.2	29.91	3.51	1436.5	0.1	1.06
2018-08-17	14:36:00	2018-08-17 14:36:00	74.7357	-95.1525	-1.21	29.91	3.43	1436.49	0.1	1.06
2018-08-17	14:37:00	2018-08-17 14:37:00	74.7357	-95.1524	-1.21	29.91	3.5	1436.49	0.1	1.06
2018-08-17	14:38:00	2018-08-17 14:38:00	74.7357	-95.1524	-1.21	29.9	3.48	1436.47	0.1	1.06
2018-08-17	14:39:00	2018-08-17 14:39:00	74.7357	-95.1523	-1.21	29.9	3.45	1436.46	0.1	1.06
2018-08-17	14:40:00	2018-08-17 14:40:00	74.7357	-95.1522	-1.21	29.9	3.55	1436.43	0.1	1.05
2018-08-17	14:41:00	2018-08-17 14:41:00	74.7357	-95.1521	-1.22	29.89	3.55	1436.42	0.1	1.06
2018-08-17	14:42:00	2018-08-17 14:42:00	74.7357	-95.152	-1.22	29.89	3.52	1436.41	0.1	1.06
2018-08-17	14:43:00	2018-08-17 14:43:00	74.7358	-95.1519	-1.22	29.89	3.61	1436.4	0.1	1.06
2018-08-17	14:44:00	2018-08-17 14:44:00	74.7358	-95.1518	-1.22	29.89	3.47	1436.4	0.09	1.05
2018-08-17	14:45:00	2018-08-17 14:45:00	74.7358	-95.1518	-1.22	29.89	3.5	1436.41	0.08	1.05
2018-08-17	14:46:00	2018-08-17 14:46:00	74.7357	-95.1517	-1.21	29.89	3.6	1436.42	0.05	1.05
2018-08-17	14:47:00	2018-08-17 14:47:00	74.7357	-95.1517	-1.21	29.9	3.56	1436.42	0.01	1.05
2018-08-17	14:48:00	2018-08-17 14:48:00	74.7357	-95.1517	-1.21	29.9	3.52	1436.42	0.02	1.05
2018-08-17	14:49:00	2018-08-17 14:49:00	74.7357	-95.1517	-1.22	29.9	3.5	1436.41	0.03	1.05
2018-08-17	14:50:00	2018-08-17 14:50:00	74.7357	-95.1517	-1.21	29.89	3.51	1436.41	0.07	1.05
2018-08-17	14:51:00	2018-08-17 14:51:00	74.7357	-95.1518	-1.21	29.89	3.43	1436.42	0.1	1.05
2018-08-17	14:52:00	2018-08-17 14:52:00	74.7357	-95.1519	-1.22	29.89	3.45	1436.41	0.11	1.04
2018-08-17	14:53:00	2018-08-17 14:53:00	74.7357	-95.1521	-1.23	29.88	3.5	1436.35	0.14	1.05
2018-08-17	14:54:00	2018-08-17 14:54:00	74.7357	-95.1522	-1.24	29.88	3.47	1436.28	0.11	1.05
2018-08-17	14:55:00	2018-08-17 14:55:00	74.7357	-95.1522	-1.25	29.87	3.51	1436.23	0.07	1.04
2018-08-17	14:56:00	2018-08-17 14:56:00	74.7357	-95.1522	-1.25	29.86	3.39	1436.22	0.08	1.05
2018-08-17	14:57:00	2018-08-17 14:57:00	74.7357	-95.1522	-1.25	29.86	3.42	1436.22	0.08	1.05
2018-08-17	14:58:00	2018-08-17 14:58:00	74.7357	-95.1521	-1.25	29.86	3.38	1436.22	0.1	1.05
2018-08-17	14:59:00	2018-08-17 14:59:00	74.7358	-95.1521	-1.25	29.87	3.39	1436.23	0.08	1.05
2018-08-17	15:00:00	2018-08-17 15:00:00	74.7357	-95.1521	-1.24	29.87	3.41	1436.25	0.04	1.05
2018-08-17	15:01:00	2018-08-17 15:01:00	74.7357	-95.152	-1.24	29.87	3.44	1436.28	0.02	1.05
2018-08-17	15:02:00	2018-08-17 15:02:00	74.7358	-95.152	-1.24	29.87	3.41	1436.29	0.06	1.05
2018-08-17	15:03:00	2018-08-17 15:03:00	74.7358	-95.1519	-1.24	29.87	3.5	1436.28	0.1	1.04
2018-08-17	15:04:00	2018-08-17 15:04:00	74.7358	-95.1518	-1.25	29.87	3.46	1436.25	0.1	1.05
2018-08-17	15:05:00	2018-08-17 15:05:00	74.7358	-95.1517	-1.25	29.87	3.52	1436.22	0.09	1.05
2018-08-17	15:06:00	2018-08-17 15:06:00	74.7357	-95.1516	-1.26	29.86	3.41	1436.17	0.07	1.05
2018-08-17	15:07:00	2018-08-17 15:07:00	74.7357	-95.1515	-1.27	29.85	3.38	1436.14	0.08	1.05
2018-08-17	15:08:00	2018-08-17 15:08:00	74.7358	-95.1515	-1.26	29.85	3.39	1436.15	0.05	1.05
2018-08-17	15:09:00	2018-08-17 15:09:00	74.7358	-95.1515	-1.25	29.85	3.26	1436.19	0.01	1.04
2018-08-17	15:10:00	2018-08-17 15:10:00	74.7358	-95.1515	-1.25	29.86	3.35	1436.22	0.06	1.05
2018-08-17	15:11:00	2018-08-17 15:11:00	74.7358	-95.1515	-1.24	29.86	3.27	1436.24	0.07	1.05
2018-08-17	15:12:00	2018-08-17 15:12:00	74.7358	-95.1516	-1.24	29.85	3.22	1436.25	0.06	1.04
2018-08-17	15:13:00	2018-08-17 15:13:00	74.7358	-95.1516	-1.23	29.85	3.38	1436.27	0.07	1.04
2018-08-17	15:14:00	2018-08-17 15:14:00	74.7358	-95.1516	-1.23	29.85	3.25	1436.28	0.07	1.05
2018-08-17	15:15:00	2018-08-17 15:15:00	74.7357	-95.1516	-1.24	29.85	3.34	1436.27	0.07	1.05
2018-08-17	15:16:00	2018-08-17 15:16:00	74.7358	-95.1516	-1.23	29.85	3.28	1436.28	0.07	1.04
2018-08-17	15:17:00	2018-08-17 15:17:00	74.7358	-95.1516	-1.23	29.85	3.33	1436.29	0.03	1.05
2018-08-17	15:18:00	2018-08-17 15:18:00	74.7358	-95.1516	-1.24	29.84	3.22	1436.26	0.02	1.05
2018-08-17	15:19:00	2018-08-17 15:19:00	74.7358	-95.1516	-1.24	29.84	3.13	1436.25	0.02	1.05
2018-08-17	15:20:00	2018-08-17 15:20:00	74.7358	-95.1517	-1.24	29.84	3.18	1436.22	0	1.01
2018-08-17	15:21:00	2018-08-17 15:21:00	74.7358	-95.1517	-1.25	29.83	3.16	1436.2	0	1.05
2018-08-17	15:22:00	2018-08-17 15:22:00	74.7358	-95.1517	-1.25	29.83	3.22	1436.16	0.03	1.04
2018-08-17	15:23:00	2018-08-17 15:23:00	74.7358	-95.1517	-1.26	29.82	3.27	1436.13	0.03	1.05
2018-08-17	15:24:00	2018-08-17 15:24:00	74.7358	-95.1517	-1.26	29.81	3.18	1436.08	0	1.05
2018-08-17	15:25:00	2018-08-17 15:25:00	74.7358	-95.1516	-1.26	29.79	3.09	1436.05	0	1.03
2018-08-17	15:26:00	2018-08-17 15:26:00	74.7358	-95.1517	-1.27	29.78	3.13	1436.01	0	1.04
2018-08-17	15:27:00	2018-08-17 15:27:00	74.7358	-95.1517	-1.27	29.76	3.05	1435.97	0	1.05
2018-08-17	15:28:00	2018-08-17 15:28:00	74.7358	-95.1517	-1.27	29.74	3.07	1435.97	0	1.04
2018-08-17	15:29:00	2018-08-17 15:29:00	74.7358	-95.1517	-1.27	29.73	3	1435.94	0	1.04
2018-08-17	15:30:00	2018-08-17 15:30:00	74.7358	-95.1517	-1.27	29.71	3.01	1435.92	0	1.04
2018-08-17	15:31:00	2018-08-17 15:31:00	74.7358	-95.1517	-1.27	29.7	2.95	1435.89	0	1.05
2018-08-17	15:32:00	2018-08-17 15:32:00	74.7358	-95.1516	-1.27	29.7	2.87	1435.89	0	1.04
2018-08-17	15:33:00	2018-08-17 15:33:00	74.7358	-95.1517	-1.27	29.69	2.89	1435.88	0	1.03
2018-08-17	15:34:00	2018-08-17 15:34:00	74.7358	-95.1516	-1.27	29.68	2.77	1435.89	0	1.04
2018-08-17	15:35:00	2018-08-17 15:35:00	74.7358	-95.1517	-1.27	29.68	2.81	1435.89	0	1.04
2018-08-17	15:36:00	2018-08-17 15:36:00	74.7358	-95.1517	-1.26	29.67	2.83	1435.89	0	1.04
2018-08-17	15:37:00	2018-08-17 15:37:00	74.7358	-95.1517	-1.26	29.67	2.74	1435.9	0	1.05
2018-08-17	15:38:00	2018-08-17 15:38:00	74.7358	-95.1517	-1.26	29.66	2.78	1435.89	0	1.04
2018-08-17	15:39:00	2018-08-17 15:39:00	74.7358	-95.1517	-1.26	29.66	2.81	1435.88	0	1.04
2018-08-17	15:40:00	2018-08-17 15:40:00	74.7358	-95.1516	-1.26	29.65	2.8	1435.88	0	1.04
2018-08-17	15:41:00	2018-08-17 15:41:00	74.7358	-95.1517	-1.26	29.65	2.7	1435.88	0	1.04
2018-08-17	15:42:00	2018-08-17 15:42:00	74.7358	-95.1517	-1.26	29.64	2.71	1435.87	0.01	1.04
2018-08-17	15:43:00	2018-08-17 15:43:00	74.7358	-95.1516	-1.26	29.64	2.78	1435.86	0.01	1.04
2018-08-17	15:44:00	2018-08-17 15:44:00	74.7358	-95.1517	-1.26	29.64	2.76	1435.85	0	1.04
2018-08-17	15:45:00	2018-08-17 15:45:00	74.7358	-95.1517	-1.27	29.63	2.69	1435.84	0	1.04
2018-08-17	15:46:00	2018-08-17 15:46:00	74.7358	-95.1516	-1.27	29.63	2.72	1435.83	0	1.04
2018-08-17	15:47:00	2018-08-17 15:47:00	74.7358	-95.1517	-1.27	29.63	2.55	1435.82	0.02	1.05
2018-08-17	15:48:00	2018-08-17 15:48:00	74.7358	-95.1517	-1.27	29.62	2.65	1435.81	0.02	1.02
2018-08-17	15:49:00	2018-08-17 15:49:00	74.7358	-95.1517	-1.27	29.62	2.62	1435.81	0	1.06
2018-08-17	15:50:00	2018-08-17 15:50:00	74.7358	-95.1517	-1.27	29.62	2.55	1435.81	0	1.06
2018-08-17	15:51:00	2018-08-17 15:51:00	74.7358	-95.1517	-1.27	29.62	2.59	1435.8	0	1.04
2018-08-17	15:52:00	2018-08-17 15:52:00	74.7358	-95.1517	-1.27	29.61	2.6	1435.79	0	1.04
2018-08-17	15:53:00	2018-08-17 15:53:00	74.7358	-95.1517	-1.27	29.61	2.58	1435.79	0	1.03
2018-08-17	15:54:00	2018-08-17 15:54:00	74.7358	-95.1517	-1.27	29.61	2.6	1435.78	0	1.03
2018-08-17	15:55:00	2018-08-17 15:55:00	74.7358	-95.1517	-1.27	29.61	2.54	1435.78	0	1.03
2018-08-17	15:56:00	2018-08-17 15:56:00	74.7358	-95.1517	-1.27	29.61	2.62	1435.78	0	1.04
2018-08-17	15:57:00	2018-08-17 15:57:00	74.7358	-95.1517	-1.27	29.61	2.6	1435.78	0	1.03
2018-08-17	15:58:00	2018-08-17 15:58:00	74.7358	-95.1517	-1.27	29.61	2.67	1435.78	0	1.03
2018-08-17	15:59:00	2018-08-17 15:59:00	74.7358	-95.1517	-1.27	29.61	2.52	1435.79	0	1.04
2018-08-17	16:00:00	2018-08-17 16:00:00	74.7358	-95.1517	-1.27	29.62	2.61	1435.79	0	1.04
2018-08-17	16:01:00	2018-08-17 16:01:00	74.7358	-95.1517	-1.27	29.62	2.64	1435.81	0	1.03
2018-08-17	16:02:00	2018-08-17 16:02:00	74.7358	-95.1517	-1.26	29.63	2.59	1435.84	0	1.03
2018-08-17	16:03:00	2018-08-17 16:03:00	74.7358	-95.1517	-1.26	29.63	2.65	1435.88	0	1.04
2018-08-17	16:04:00	2018-08-17 16:04:00	74.7358	-95.1517	-1.26	29.64	2.82	1435.88	0	1.04
2018-08-17	16:05:00	2018-08-17 16:05:00	74.7358	-95.1517	-1.26	29.64	2.71	1435.89	0	1.03
2018-08-17	16:06:00	2018-08-17 16:06:00	74.7358	-95.1516	-1.25	29.65	2.76	1435.92	0.02	1.03
2018-08-17	16:07:00	2018-08-17 16:07:00	74.7358	-95.1517	-1.25	29.65	2.71	1435.92	0.02	1.03
2018-08-17	16:08:00	2018-08-17 16:08:00	74.7358	-95.1517	-1.26	29.65	2.75	1435.91	0	1.03
2018-08-17	16:09:00	2018-08-17 16:09:00	74.7358	-95.1517	-1.26	29.65	2.77	1435.89	0	1.02
2018-08-17	16:10:00	2018-08-17 16:10:00	74.7358	-95.1516	-1.26	29.64	2.77	1435.88	0	0.98
2018-08-17	16:11:00	2018-08-17 16:11:00	74.7358	-95.1517	-1.26	29.64	2.79	1435.87	0	1.02
2018-08-17	16:12:00	2018-08-17 16:12:00	74.7358	-95.1517	-1.26	29.63	2.72	1435.86	0	1.01
2018-08-17	16:13:00	2018-08-17 16:13:00	74.7358	-95.1517	-1.27	29.63	2.69	1435.84	0	1.01
2018-08-17	16:14:00	2018-08-17 16:14:00	74.7358	-95.1517	-1.27	29.63	2.72	1435.83	0	1.01
2018-08-17	16:15:00	2018-08-17 16:15:00	74.7358	-95.1516	-1.27	29.63	2.73	1435.82	0	1.01
2018-08-17	16:16:00	2018-08-17 16:16:00	74.7358	-95.1517	-1.27	29.62	2.73	1435.82	0.01	1.01
2018-08-17	16:17:00	2018-08-17 16:17:00	74.7358	-95.1517	-1.27	29.62	2.72	1435.82	0.01	1.01
2018-08-17	16:18:00	2018-08-17 16:18:00	74.7358	-95.1516	-1.27	29.62	2.67	1435.81	0.02	1.01
2018-08-17	16:19:00	2018-08-17 16:19:00	74.7358	-95.1516	-1.27	29.62	2.73	1435.82	0.02	1.01
2018-08-17	16:20:00	2018-08-17 16:20:00	74.7358	-95.1516	-1.27	29.62	2.74	1435.82	0	1.01
2018-08-17	16:21:00	2018-08-17 16:21:00	74.7358	-95.1516	-1.27	29.62	2.72	1435.81	0	1.01
2018-08-17	16:22:00	2018-08-17 16:22:00	74.7358	-95.1516	-1.27	29.62	2.75	1435.81	0	1.01
2018-08-17	16:23:00	2018-08-17 16:23:00	74.7358	-95.1516	-1.27	29.62	2.71	1435.81	0	1.01
2018-08-17	16:24:00	2018-08-17 16:24:00	74.7358	-95.1516	-1.27	29.62	2.68	1435.81	0	1.01
2018-08-17	16:25:00	2018-08-17 16:25:00	74.7358	-95.1516	-1.27	29.62	2.64	1435.81	0	1.01
2018-08-17	16:26:00	2018-08-17 16:26:00	74.7358	-95.1516	-1.27	29.62	2.75	1435.8	0	1.01
2018-08-17	16:27:00	2018-08-17 16:27:00	74.7358	-95.1516	-1.27	29.62	2.75	1435.8	0	1.01
2018-08-17	16:28:00	2018-08-17 16:28:00	74.7358	-95.1516	-1.27	29.62	2.74	1435.81	0	1.01
2018-08-17	16:29:00	2018-08-17 16:29:00	74.7358	-95.1516	-1.27	29.62	2.75	1435.81	0	1
2018-08-17	16:30:00	2018-08-17 16:30:00	74.7358	-95.1516	-1.27	29.62	2.71	1435.79	0	1
2018-08-17	16:31:00	2018-08-17 16:31:00	74.7358	-95.1516	-1.27	29.62	2.75	1435.8	0	1
2018-08-17	16:32:00	2018-08-17 16:32:00	74.7358	-95.1516	-1.27	29.62	2.79	1435.8	0	1.01
2018-08-17	16:33:00	2018-08-17 16:33:00	74.7358	-95.1516	-1.27	29.62	2.78	1435.8	0	1
2018-08-17	16:34:00	2018-08-17 16:34:00	74.7358	-95.1516	-1.27	29.62	2.75	1435.8	0	1.01
2018-08-17	16:35:00	2018-08-17 16:35:00	74.7358	-95.1516	-1.28	29.62	2.74	1435.79	0	1
2018-08-17	16:36:00	2018-08-17 16:36:00	74.7358	-95.1516	-1.27	29.63	2.67	1435.79	0	1.01
2018-08-17	16:37:00	2018-08-17 16:37:00	74.7358	-95.1516	-1.27	29.62	2.7	1435.8	0	1
2018-08-17	16:38:00	2018-08-17 16:38:00	74.7358	-95.1516	-1.27	29.63	2.74	1435.79	0	1.01
2018-08-17	16:39:00	2018-08-17 16:39:00	74.7358	-95.1516	-1.27	29.63	2.76	1435.8	0	1.01
2018-08-17	16:40:00	2018-08-17 16:40:00	74.7358	-95.1516	-1.27	29.63	2.74	1435.82	0	1
2018-08-17	16:41:00	2018-08-17 16:41:00	74.7358	-95.1516	-1.27	29.63	2.76	1435.82	0.01	0.99
2018-08-17	16:42:00	2018-08-17 16:42:00	74.7358	-95.1515	-1.27	29.63	2.76	1435.82	0.01	0.99
2018-08-17	16:43:00	2018-08-17 16:43:00	74.7358	-95.1515	-1.28	29.63	2.72	1435.79	0.02	0.99
2018-08-17	16:44:00	2018-08-17 16:44:00	74.7358	-95.1515	-1.28	29.62	2.71	1435.76	0.02	0.98
2018-08-17	16:45:00	2018-08-17 16:45:00	74.7358	-95.1515	-1.28	29.62	2.7	1435.75	0	0.99
2018-08-17	16:46:00	2018-08-17 16:46:00	74.7358	-95.1515	-1.28	29.61	2.65	1435.75	0	1
2018-08-17	16:47:00	2018-08-17 16:47:00	74.7358	-95.1515	-1.28	29.61	2.7	1435.75	0	1.01
2018-08-17	16:48:00	2018-08-17 16:48:00	74.7358	-95.1515	-1.28	29.61	2.6	1435.72	0	1.01
2018-08-17	16:49:00	2018-08-17 16:49:00	74.7358	-95.1515	-1.28	29.61	2.68	1435.71	0	1
2018-08-17	16:50:00	2018-08-17 16:50:00	74.7358	-95.1514	-1.28	29.61	2.56	1435.72	0	1
2018-08-17	16:51:00	2018-08-17 16:51:00	74.7357	-95.1514	-1.28	29.61	2.58	1435.71	0	1
2018-08-17	16:52:00	2018-08-17 16:52:00	74.7357	-95.1514	-1.28	29.6	2.52	1435.71	0	1
2018-08-17	16:53:00	2018-08-17 16:53:00	74.7357	-95.1514	-1.29	29.6	2.59	1435.69	0	1
2018-08-17	16:54:00	2018-08-17 16:54:00	74.7357	-95.1514	-1.29	29.6	2.58	1435.67	0	1
2018-08-17	16:55:00	2018-08-17 16:55:00	74.7357	-95.1513	-1.29	29.6	2.55	1435.68	0	1
2018-08-17	16:56:00	2018-08-17 16:56:00	74.7357	-95.1513	-1.29	29.6	2.62	1435.68	0	1
2018-08-17	16:57:00	2018-08-17 16:57:00	74.7357	-95.1513	-1.29	29.59	2.61	1435.67	0	1
2018-08-17	16:58:00	2018-08-17 16:58:00	74.7357	-95.1513	-1.29	29.59	2.57	1435.65	0.01	1
2018-08-17	16:59:00	2018-08-17 16:59:00	74.7357	-95.1512	-1.3	29.59	2.6	1435.62	0.02	1
2018-08-17	17:00:00	2018-08-17 17:00:00	74.7357	-95.1512	-1.3	29.59	2.58	1435.61	0.01	1
2018-08-17	17:01:00	2018-08-17 17:01:00	74.7357	-95.1512	-1.3	29.58	2.52	1435.6	0	1.01
2018-08-17	17:02:00	2018-08-17 17:02:00	74.7357	-95.1511	-1.3	29.58	2.58	1435.59	0	1
2018-08-17	17:03:00	2018-08-17 17:03:00	74.7357	-95.1511	-1.3	29.58	2.55	1435.59	0	1
2018-08-17	17:04:00	2018-08-17 17:04:00	74.7357	-95.1511	-1.31	29.58	2.53	1435.57	0	1
2018-08-17	17:05:00	2018-08-17 17:05:00	74.7357	-95.1511	-1.31	29.58	2.54	1435.57	0	1
2018-08-17	17:06:00	2018-08-17 17:06:00	74.7357	-95.1511	-1.31	29.58	2.56	1435.57	0	1
2018-08-17	17:07:00	2018-08-17 17:07:00	74.7357	-95.151	-1.31	29.58	2.59	1435.57	0	1
2018-08-17	17:08:00	2018-08-17 17:08:00	74.7357	-95.151	-1.31	29.58	2.57	1435.58	0	1
2018-08-17	17:09:00	2018-08-17 17:09:00	74.7357	-95.151	-1.3	29.58	2.63	1435.59	0	1
2018-08-17	17:10:00	2018-08-17 17:10:00	74.7357	-95.151	-1.3	29.58	2.6	1435.59	0.02	1
2018-08-17	17:11:00	2018-08-17 17:11:00	74.7357	-95.151	-1.3	29.58	2.57	1435.59	0.02	1
2018-08-17	17:12:00	2018-08-17 17:12:00	74.7357	-95.151	-1.3	29.58	2.57	1435.6	0	1
2018-08-17	17:13:00	2018-08-17 17:13:00	74.7357	-95.151	-1.3	29.58	2.57	1435.6	0	1
2018-08-17	17:14:00	2018-08-17 17:14:00	74.7357	-95.1509	-1.3	29.58	2.59	1435.61	0	1
2018-08-17	17:15:00	2018-08-17 17:15:00	74.7357	-95.1509	-1.3	29.59	2.67	1435.63	0	1
2018-08-17	17:16:00	2018-08-17 17:16:00	74.7357	-95.1509	-1.29	29.6	2.66	1435.66	0	1
2018-08-17	17:17:00	2018-08-17 17:17:00	74.7357	-95.1509	-1.3	29.6	2.61	1435.66	0	1
2018-08-17	17:18:00	2018-08-17 17:18:00	74.7357	-95.1509	-1.29	29.61	2.54	1435.67	0.02	1
2018-08-17	17:19:00	2018-08-17 17:19:00	74.7357	-95.1509	-1.29	29.61	2.58	1435.7	0.03	1
2018-08-17	17:20:00	2018-08-17 17:20:00	74.7357	-95.1508	-1.29	29.61	2.63	1435.72	0.06	1
2018-08-17	17:21:00	2018-08-17 17:21:00	74.7357	-95.1508	-1.29	29.61	2.64	1435.71	0.06	1
2018-08-17	17:22:00	2018-08-17 17:22:00	74.7357	-95.1508	-1.29	29.61	2.6	1435.68	0.02	0.98
2018-08-17	17:23:00	2018-08-17 17:23:00	74.7357	-95.1507	-1.3	29.6	2.62	1435.65	0	1
2018-08-17	17:24:00	2018-08-17 17:24:00	74.7357	-95.1507	-1.3	29.59	2.51	1435.63	0	1
2018-08-17	17:25:00	2018-08-17 17:25:00	74.7357	-95.1507	-1.3	29.59	2.57	1435.62	0	1
2018-08-17	17:26:00	2018-08-17 17:26:00	74.7357	-95.1507	-1.29	29.6	2.6	1435.65	0.01	0.98
2018-08-17	17:27:00	2018-08-17 17:27:00	74.7357	-95.1507	-1.29	29.6	2.59	1435.67	0.01	1
2018-08-17	17:28:00	2018-08-17 17:28:00	74.7357	-95.1506	-1.29	29.61	2.58	1435.68	0	1
2018-08-17	17:29:00	2018-08-17 17:29:00	74.7357	-95.1506	-1.29	29.61	2.61	1435.69	0	1
2018-08-17	17:30:00	2018-08-17 17:30:00	74.7357	-95.1506	-1.29	29.62	2.62	1435.71	0	1
2018-08-17	17:31:00	2018-08-17 17:31:00	74.7357	-95.1506	-1.29	29.62	2.62	1435.72	0.05	0.99
2018-08-17	17:32:00	2018-08-17 17:32:00	74.7357	-95.1505	-1.29	29.63	2.64	1435.74	0.06	1
2018-08-17	17:33:00	2018-08-17 17:33:00	74.7357	-95.1505	-1.29	29.63	2.65	1435.75	0.03	1
2018-08-17	17:34:00	2018-08-17 17:34:00	74.7357	-95.1505	-1.28	29.63	2.66	1435.76	0.02	1
2018-08-17	17:35:00	2018-08-17 17:35:00	74.7357	-95.1504	-1.28	29.63	2.57	1435.77	0.02	1
2018-08-17	17:36:00	2018-08-17 17:36:00	74.7357	-95.1504	-1.28	29.62	2.59	1435.74	0.01	1
2018-08-17	17:37:00	2018-08-17 17:37:00	74.7357	-95.1504	-1.29	29.61	2.54	1435.67	0	1
2018-08-17	17:38:00	2018-08-17 17:38:00	74.7357	-95.1504	-1.29	29.59	2.62	1435.67	0.01	1
2018-08-17	17:39:00	2018-08-17 17:39:00	74.7357	-95.1503	-1.3	29.59	2.45	1435.63	0.05	1
2018-08-17	17:40:00	2018-08-17 17:40:00	74.7357	-95.1503	-1.3	29.58	2.5	1435.61	0.05	1
2018-08-17	17:41:00	2018-08-17 17:41:00	74.7357	-95.1503	-1.3	29.58	2.49	1435.61	0.04	1
2018-08-17	17:42:00	2018-08-17 17:42:00	74.7357	-95.1502	-1.3	29.58	2.52	1435.59	0.03	1
2018-08-17	17:43:00	2018-08-17 17:43:00	74.7356	-95.1502	-1.3	29.58	2.54	1435.59	0	1
2018-08-17	17:44:00	2018-08-17 17:44:00	74.7356	-95.1502	-1.31	29.57	2.55	1435.56	0.03	0.99
2018-08-17	17:45:00	2018-08-17 17:45:00	74.7356	-95.1501	-1.31	29.57	2.56	1435.56	0.03	1
2018-08-17	17:46:00	2018-08-17 17:46:00	74.7356	-95.1501	-1.31	29.57	2.5	1435.56	0.04	1
2018-08-17	17:47:00	2018-08-17 17:47:00	74.7356	-95.1501	-1.31	29.57	2.5	1435.55	0.04	1
2018-08-17	17:48:00	2018-08-17 17:48:00	74.7356	-95.15	-1.31	29.57	2.53	1435.54	0.01	1
2018-08-17	17:49:00	2018-08-17 17:49:00	74.7356	-95.15	-1.31	29.57	2.56	1435.55	0.01	1
2018-08-17	17:50:00	2018-08-17 17:50:00	74.7356	-95.15	-1.3	29.57	2.44	1435.58	0.01	1
2018-08-17	17:51:00	2018-08-17 17:51:00	74.7356	-95.15	-1.3	29.58	2.49	1435.6	0	1
2018-08-17	17:52:00	2018-08-17 17:52:00	74.7356	-95.15	-1.3	29.6	2.62	1435.64	0	1
2018-08-17	17:53:00	2018-08-17 17:53:00	74.7356	-95.15	-1.29	29.6	2.55	1435.67	0	1
2018-08-17	17:54:00	2018-08-17 17:54:00	74.7356	-95.15	-1.29	29.61	2.62	1435.68	0	1
2018-08-17	17:55:00	2018-08-17 17:55:00	74.7356	-95.15	-1.29	29.62	2.58	1435.72	0	1
2018-08-17	17:56:00	2018-08-17 17:56:00	74.7356	-95.15	-1.29	29.62	2.53	1435.74	0	1
2018-08-17	17:57:00	2018-08-17 17:57:00	74.7356	-95.15	-1.29	29.63	2.58	1435.73	0	1
2018-08-17	17:58:00	2018-08-17 17:58:00	74.7356	-95.15	-1.28	29.62	2.53	1435.74	0	0.99
2018-08-17	17:59:00	2018-08-17 17:59:00	74.7356	-95.15	-1.29	29.61	2.39	1435.7	0	1
2018-08-17	18:00:00	2018-08-17 18:00:00	74.7356	-95.15	-1.3	29.6	2.33	1435.64	0	1
2018-08-17	18:01:00	2018-08-17 18:01:00	74.7356	-95.15	-1.3	29.59	2.33	1435.61	0	0.99
2018-08-17	18:02:00	2018-08-17 18:02:00	74.7356	-95.15	-1.3	29.58	2.26	1435.61	0	1
2018-08-17	18:03:00	2018-08-17 18:03:00	74.7356	-95.15	-1.3	29.58	2.2	1435.6	0	1
2018-08-17	18:04:00	2018-08-17 18:04:00	74.7356	-95.15	-1.3	29.58	2.2	1435.6	0	1
2018-08-17	18:05:00	2018-08-17 18:05:00	74.7356	-95.15	-1.3	29.57	2.2	1435.6	0	1
2018-08-17	18:06:00	2018-08-17 18:06:00	74.7356	-95.15	-1.3	29.57	2.14	1435.59	0	1
2018-08-17	18:07:00	2018-08-17 18:07:00	74.7356	-95.15	-1.3	29.57	2.05	1435.59	0.02	1
2018-08-17	18:08:00	2018-08-17 18:08:00	74.7356	-95.15	-1.3	29.57	1.91	1435.57	0.02	1
2018-08-17	18:09:00	2018-08-17 18:09:00	74.7356	-95.15	-1.31	29.57	1.93	1435.56	0	1
2018-08-17	18:10:00	2018-08-17 18:10:00	74.7356	-95.15	-1.31	29.57	1.97	1435.55	0	1
2018-08-17	18:11:00	2018-08-17 18:11:00	74.7356	-95.15	-1.31	29.57	1.95	1435.54	0	1
2018-08-17	18:12:00	2018-08-17 18:12:00	74.7356	-95.15	-1.31	29.57	2.04	1435.55	0	1
2018-08-17	18:13:00	2018-08-17 18:13:00	74.7356	-95.15	-1.31	29.57	2.05	1435.52	0	1
2018-08-17	18:14:00	2018-08-17 18:14:00	74.7356	-95.15	-1.31	29.56	2.19	1435.53	0	1
2018-08-17	18:15:00	2018-08-17 18:15:00	74.7356	-95.15	-1.31	29.56	2.21	1435.53	0	0.99
2018-08-17	18:16:00	2018-08-17 18:16:00	74.7356	-95.15	-1.31	29.57	2.3	1435.57	0	1
2018-08-17	18:17:00	2018-08-17 18:17:00	74.7356	-95.15	-1.31	29.58	2.3	1435.58	0	1
2018-08-17	18:18:00	2018-08-17 18:18:00	74.7356	-95.15	-1.31	29.58	2.33	1435.55	0	1
2018-08-17	18:19:00	2018-08-17 18:19:00	74.7356	-95.15	-1.32	29.57	2.36	1435.52	0	1
2018-08-17	18:20:00	2018-08-17 18:20:00	74.7356	-95.15	-1.32	29.57	2.33	1435.5	0	1
2018-08-17	18:21:00	2018-08-17 18:21:00	74.7356	-95.15	-1.32	29.57	2.2	1435.5	0	1
2018-08-17	18:22:00	2018-08-17 18:22:00	74.7356	-95.15	-1.31	29.56	2.04	1435.53	0	1
2018-08-17	18:23:00	2018-08-17 18:23:00	74.7356	-95.15	-1.3	29.56	1.93	1435.58	0	1.02
2018-08-17	18:24:00	2018-08-17 18:24:00	74.7356	-95.15	-1.3	29.56	1.87	1435.58	0	1.06
2018-08-17	18:25:00	2018-08-17 18:25:00	74.7356	-95.15	-1.29	29.55	1.75	1435.59	0.01	1.06
2018-08-17	18:26:00	2018-08-17 18:26:00	74.7356	-95.15	-1.3	29.55	1.71	1435.57	0.01	1.05
2018-08-17	18:27:00	2018-08-17 18:27:00	74.7356	-95.15	-1.3	29.55	1.63	1435.56	0	1.05
2018-08-17	18:28:00	2018-08-17 18:28:00	74.7356	-95.15	-1.3	29.55	1.67	1435.55	0	1.06
2018-08-17	18:29:00	2018-08-17 18:29:00	74.7356	-95.15	-1.31	29.54	1.62	1435.52	0.01	1.05
2018-08-17	18:30:00	2018-08-17 18:30:00	74.7356	-95.15	-1.31	29.54	1.65	1435.49	0.03	1.05
2018-08-17	18:31:00	2018-08-17 18:31:00	74.7356	-95.15	-1.31	29.54	1.75	1435.48	0.02	1.05
2018-08-17	18:32:00	2018-08-17 18:32:00	74.7356	-95.15	-1.31	29.53	1.72	1435.48	0	1.05
2018-08-17	18:33:00	2018-08-17 18:33:00	74.7356	-95.15	-1.31	29.53	1.81	1435.47	0.01	1.06
2018-08-17	18:34:00	2018-08-17 18:34:00	74.7356	-95.15	-1.32	29.53	1.76	1435.47	0.01	1.06
2018-08-17	18:35:00	2018-08-17 18:35:00	74.7356	-95.15	-1.31	29.53	1.79	1435.47	0.01	1.06
2018-08-17	18:36:00	2018-08-17 18:36:00	74.7356	-95.15	-1.32	29.53	1.78	1435.47	0.01	1.05
2018-08-17	18:37:00	2018-08-17 18:37:00	74.7356	-95.15	-1.32	29.53	1.76	1435.46	0	1.06
2018-08-17	18:38:00	2018-08-17 18:38:00	74.7356	-95.15	-1.32	29.53	1.69	1435.46	0	1.06
2018-08-17	18:39:00	2018-08-17 18:39:00	74.7356	-95.15	-1.32	29.53	1.7	1435.46	0	1.06
2018-08-17	18:40:00	2018-08-17 18:40:00	74.7356	-95.15	-1.32	29.53	1.82	1435.45	0.01	1.06
2018-08-17	18:41:00	2018-08-17 18:41:00	74.7356	-95.15	-1.31	29.53	1.8	1435.47	0.13	1.05
2018-08-17	18:42:00	2018-08-17 18:42:00	74.7356	-95.15	-1.31	29.53	1.83	1435.48	0.19	1.06
2018-08-17	18:43:00	2018-08-17 18:43:00	74.7356	-95.15	-1.31	29.53	1.92	1435.49	0.1	1.06
2018-08-17	18:44:00	2018-08-17 18:44:00	74.7356	-95.15	-1.31	29.53	1.92	1435.49	0.13	1.06
2018-08-17	18:45:00	2018-08-17 18:45:00	74.7356	-95.15	-1.31	29.53	1.84	1435.51	0.2	1.04
2018-08-17	18:46:00	2018-08-17 18:46:00	74.7356	-95.15	-1.3	29.53	1.84	1435.56	0.26	1.06
2018-08-17	18:47:00	2018-08-17 18:47:00	74.7356	-95.15	-1.29	29.54	1.93	1435.65	0.33	1.06
2018-08-17	18:48:00	2018-08-17 18:48:00	74.7356	-95.15	-1.28	29.58	2.2	1435.73	0.33	1.06
2018-08-17	18:49:00	2018-08-17 18:49:00	74.7357	-95.15	-1.26	29.62	2.27	1435.89	0.29	1.06
2018-08-17	18:50:00	2018-08-17 18:50:00	74.7357	-95.15	-1.25	29.66	2.45	1435.97	0.32	1.06
2018-08-17	18:51:00	2018-08-17 18:51:00	74.7358	-95.15	-1.25	29.7	2.8	1436.03	0.26	1.06
2018-08-17	18:52:00	2018-08-17 18:52:00	74.7358	-95.15	-1.25	29.71	2.53	1436	0.16	1.05
2018-08-17	18:53:00	2018-08-17 18:53:00	74.7358	-95.15	-1.25	29.72	2.42	1436.03	0.33	1.06
2018-08-17	18:54:00	2018-08-17 18:54:00	74.7357	-95.1501	-1.25	29.73	2.4	1436.02	0.39	1.05
2018-08-17	18:55:00	2018-08-17 18:55:00	74.7356	-95.1502	-1.25	29.74	2.35	1436.07	0.39	1.06
2018-08-17	18:56:00	2018-08-17 18:56:00	74.7357	-95.1501	-1.25	29.75	2.48	1436.07	0.38	1.05
2018-08-17	18:57:00	2018-08-17 18:57:00	74.7358	-95.1501	-1.25	29.74	2.49	1436.08	0.14	1.06
2018-08-17	18:58:00	2018-08-17 18:58:00	74.7358	-95.1501	-1.26	29.73	2.29	1436.01	0	1.06
2018-08-17	18:59:00	2018-08-17 18:59:00	74.7358	-95.1501	-1.26	29.71	2.22	1435.97	0.67	1.06
2018-08-17	19:00:00	2018-08-17 19:00:00	74.7355	-95.1505	-1.27	29.7	2.13	1435.95	2.2	1.05
2018-08-17	19:01:00	2018-08-17 19:01:00	74.7347	-95.1522	-1.29	29.69	2.19	1435.85	3.16	1.05
2018-08-17	19:02:00	2018-08-17 19:02:00	74.7339	-95.1538	-1.34	29.64	2.05	1435.55	3.54	1.05
2018-08-17	19:03:00	2018-08-17 19:03:00	74.7329	-95.1548	-1.35	29.59	1.85	1435.36	4.41	1.04
2018-08-17	19:04:00	2018-08-17 19:04:00	74.7316	-95.1559	-1.41	29.57	1.7	1434.92	4.48	1.05
2018-08-17	19:05:00	2018-08-17 19:05:00	74.7305	-95.1561	-1.41	29.47	1.63	1434.96	3.88	1.05
2018-08-17	19:06:00	2018-08-17 19:06:00	74.7294	-95.1549	-1.38	29.51	1.43	1435.15	3.94	1.05
2018-08-17	19:07:00	2018-08-17 19:07:00	74.7286	-95.1523	-1.38	29.53	1.45	1435.15	3.98	1.06
2018-08-17	19:08:00	2018-08-17 19:08:00	74.7284	-95.1484	-1.38	29.51	1.27	1435.15	3.82	1.06
2018-08-17	19:09:00	2018-08-17 19:09:00	74.7284	-95.1444	-1.4	29.51	1.18	1435.05	3.89	1.06
2018-08-17	19:10:00	2018-08-17 19:10:00	74.728	-95.1406	-1.4	29.48	1.13	1434.95	4.45	1.04
2018-08-17	19:11:00	2018-08-17 19:11:00	74.7272	-95.1364	-1.43	29.46	1.15	1434.93	4.85	1.05
2018-08-17	19:12:00	2018-08-17 19:12:00	74.7263	-95.1326	-1.41	29.32	1.25	1434.7	4.93	1.04
2018-08-17	19:13:00	2018-08-17 19:13:00	74.7255	-95.1282	-1.38	29.35	1.19	1434.88	4.32	1.06
2018-08-17	19:14:00	2018-08-17 19:14:00	74.725	-95.1252	-1.34	29.4	1	1435.11	2.28	1.06
2018-08-17	19:15:00	2018-08-17 19:15:00	74.7249	-95.124	-1.33	29.44	0.78	1435.27	1.06	1.06
2018-08-17	19:16:00	2018-08-17 19:16:00	74.7248	-95.1232	-1.32	29.45	0.64	1435.32	0.8	1.06
2018-08-17	19:17:00	2018-08-17 19:17:00	74.7248	-95.1224	-1.3	29.46	0.63	1435.43	0.97	1.05
2018-08-17	19:18:00	2018-08-17 19:18:00	74.7247	-95.1212	-1.28	29.47	0.59	1435.51	1.32	1.06
2018-08-17	19:19:00	2018-08-17 19:19:00	74.7247	-95.1196	-1.25	29.48	0.56	1435.65	1.5	1.06
2018-08-17	19:20:00	2018-08-17 19:20:00	74.7246	-95.118	-1.23	29.5	0.51	1435.83	1.59	1.06
2018-08-17	19:21:00	2018-08-17 19:21:00	74.7244	-95.1163	-1.22	29.52	0.53	1435.9	2.42	1.06
2018-08-17	19:22:00	2018-08-17 19:22:00	74.7237	-95.1143	-1.22	29.54	0.54	1435.95	3.19	1.05
2018-08-17	19:23:00	2018-08-17 19:23:00	74.7228	-95.114	-1.2	29.57	0.52	1436.07	3.06	1.06
2018-08-17	19:24:00	2018-08-17 19:24:00	74.722	-95.1145	-1.18	29.6	0.54	1436.2	2.88	1.06
2018-08-17	19:25:00	2018-08-17 19:25:00	74.7213	-95.1161	-1.17	29.61	0.55	1436.28	2.72	1.06
2018-08-17	19:26:00	2018-08-17 19:26:00	74.7209	-95.1181	-1.16	29.62	0.53	1436.34	2.38	1.06
2018-08-17	19:27:00	2018-08-17 19:27:00	74.7206	-95.1201	-1.16	29.62	0.56	1436.36	2.07	1.06
2018-08-17	19:28:00	2018-08-17 19:28:00	74.7205	-95.1222	-1.16	29.62	0.61	1436.36	1.83	1.05
2018-08-17	19:29:00	2018-08-17 19:29:00	74.7205	-95.124	-1.16	29.62	0.66	1436.35	1.69	1.05
2018-08-17	19:30:00	2018-08-17 19:30:00	74.7206	-95.1257	-1.16	29.63	0.67	1436.35	1.58	1.06
2018-08-17	19:31:00	2018-08-17 19:31:00	74.7207	-95.1273	-1.16	29.63	0.7	1436.34	1.45	1.05
2018-08-17	19:32:00	2018-08-17 19:32:00	74.7207	-95.1287	-1.16	29.63	0.75	1436.32	1.26	1.06
2018-08-17	19:33:00	2018-08-17 19:33:00	74.7208	-95.1299	-1.17	29.63	0.8	1436.3	1.12	1.05
2018-08-17	19:34:00	2018-08-17 19:34:00	74.7208	-95.1311	-1.17	29.63	0.83	1436.3	0.99	1.06
2018-08-17	19:35:00	2018-08-17 19:35:00	74.7208	-95.132	-1.17	29.64	0.91	1436.3	0.88	1.05
2018-08-17	19:36:00	2018-08-17 19:36:00	74.7208	-95.1329	-1.17	29.64	0.91	1436.29	0.8	1.05
2018-08-17	19:37:00	2018-08-17 19:37:00	74.7208	-95.1337	-1.17	29.64	0.94	1436.28	0.73	1.06
2018-08-17	19:38:00	2018-08-17 19:38:00	74.7208	-95.1344	-1.17	29.64	0.94	1436.28	0.67	1.05
2018-08-17	19:39:00	2018-08-17 19:39:00	74.7208	-95.1351	-1.17	29.63	0.89	1436.28	0.62	1.06
2018-08-17	19:40:00	2018-08-17 19:40:00	74.7208	-95.1358	-1.17	29.63	0.92	1436.28	0.6	1.06
2018-08-17	19:41:00	2018-08-17 19:41:00	74.7208	-95.1364	-1.17	29.63	0.93	1436.28	0.57	1.06
2018-08-17	19:42:00	2018-08-17 19:42:00	74.7208	-95.137	-1.17	29.63	0.93	1436.28	0.53	1.06
2018-08-17	19:43:00	2018-08-17 19:43:00	74.7208	-95.1375	-1.17	29.63	0.9	1436.28	0.5	1.06
2018-08-17	19:44:00	2018-08-17 19:44:00	74.7208	-95.1381	-1.17	29.63	0.93	1436.27	0.48	1.05
2018-08-17	19:45:00	2018-08-17 19:45:00	74.7208	-95.1385	-1.17	29.62	0.89	1436.26	0.43	1.06
2018-08-17	19:46:00	2018-08-17 19:46:00	74.7208	-95.139	-1.17	29.62	0.92	1436.26	0.4	1.05
2018-08-17	19:47:00	2018-08-17 19:47:00	74.7208	-95.1395	-1.17	29.62	0.86	1436.25	0.39	1.06
2018-08-17	19:48:00	2018-08-17 19:48:00	74.7207	-95.1399	-1.18	29.61	0.88	1436.23	0.27	1.06
2018-08-17	19:49:00	2018-08-17 19:49:00	74.7208	-95.14	-1.18	29.61	0.89	1436.2	0.13	1.06
2018-08-17	19:50:00	2018-08-17 19:50:00	74.7208	-95.14	-1.19	29.61	0.91	1436.18	0.1	1.06
2018-08-17	19:51:00	2018-08-17 19:51:00	74.7208	-95.1399	-1.19	29.6	0.99	1436.16	0.14	1.06
2018-08-17	19:52:00	2018-08-17 19:52:00	74.7208	-95.1398	-1.2	29.6	1.08	1436.13	0.15	1.06
2018-08-17	19:53:00	2018-08-17 19:53:00	74.7208	-95.1396	-1.2	29.61	1.15	1436.09	0.18	1.06
2018-08-17	19:54:00	2018-08-17 19:54:00	74.7209	-95.1395	-1.2	29.61	1.19	1436.15	0.23	1.06
2018-08-17	19:55:00	2018-08-17 19:55:00	74.7209	-95.1393	-1.2	29.64	1.36	1436.18	0.22	1.06
2018-08-17	19:56:00	2018-08-17 19:56:00	74.721	-95.1391	-1.2	29.66	1.56	1436.21	0.23	1.06
2018-08-17	19:57:00	2018-08-17 19:57:00	74.721	-95.1389	-1.2	29.68	1.76	1436.2	0.24	1.06
2018-08-17	19:58:00	2018-08-17 19:58:00	74.721	-95.1387	-1.19	29.68	1.74	1436.26	0.23	1.06
2018-08-17	19:59:00	2018-08-17 19:59:00	74.7211	-95.1385	-1.18	29.67	1.69	1436.31	0.2	1.06
2018-08-17	20:00:00	2018-08-17 20:00:00	74.7211	-95.1383	-1.18	29.67	1.56	1436.3	0.15	1.05
2018-08-17	20:01:00	2018-08-17 20:01:00	74.7211	-95.1382	-1.18	29.67	1.45	1436.28	0.14	1.05
2018-08-17	20:02:00	2018-08-17 20:02:00	74.7211	-95.1381	-1.15	29.67	1.34	1436.32	0.18	1.06
2018-08-17	20:03:00	2018-08-17 20:03:00	74.7211	-95.1379	-1.1	29.67	1.33	1436.73	0.19	1.05
2018-08-17	20:04:00	2018-08-17 20:04:00	74.7211	-95.1378	-1.1	29.68	1.36	1436.69	0.2	1.05
2018-08-17	20:05:00	2018-08-17 20:05:00	74.7212	-95.1376	-1.13	29.69	1.29	1436.59	0.2	1.06
2018-08-17	20:06:00	2018-08-17 20:06:00	74.7212	-95.1374	-1.15	29.69	1.27	1436.47	0.2	1.05
2018-08-17	20:07:00	2018-08-17 20:07:00	74.7212	-95.1372	-1.16	29.68	1.21	1436.41	0.21	1.06
2018-08-17	20:08:00	2018-08-17 20:08:00	74.7212	-95.137	-1.17	29.68	1.15	1436.37	0.21	1.06
2018-08-17	20:09:00	2018-08-17 20:09:00	74.7212	-95.1368	-1.17	29.67	1.16	1436.36	0.22	1.06
2018-08-17	20:10:00	2018-08-17 20:10:00	74.7213	-95.1366	-1.16	29.67	1.17	1436.39	0.22	1.06
2018-08-17	20:11:00	2018-08-17 20:11:00	74.7213	-95.1364	-1.13	29.67	1.23	1436.49	0.24	1.06
2018-08-17	20:12:00	2018-08-17 20:12:00	74.7214	-95.1362	-1.14	29.66	1.28	1436.48	0.28	1.06
2018-08-17	20:13:00	2018-08-17 20:13:00	74.7214	-95.136	-1.06	29.66	1.32	1436.79	0.3	1.06
2018-08-17	20:14:00	2018-08-17 20:14:00	74.7215	-95.1358	-1.04	29.66	1.44	1436.97	0.3	1.06
2018-08-17	20:15:00	2018-08-17 20:15:00	74.7215	-95.1356	-1.07	29.67	1.56	1436.88	0.33	1.06
2018-08-17	20:16:00	2018-08-17 20:16:00	74.7216	-95.1353	-1.11	29.68	1.68	1436.7	0.36	1.06
2018-08-17	20:17:00	2018-08-17 20:17:00	74.7216	-95.1351	-1.14	29.68	1.79	1436.56	0.29	1.06
2018-08-17	20:18:00	2018-08-17 20:18:00	74.7217	-95.1349	-1.16	29.68	1.94	1436.41	0.22	1.06
2018-08-17	20:19:00	2018-08-17 20:19:00	74.7217	-95.1347	-1.18	29.69	1.93	1436.35	0.2	1.05
2018-08-17	20:20:00	2018-08-17 20:20:00	74.7217	-95.1346	-1.19	29.69	2.06	1436.27	0.2	1.05
2018-08-17	20:21:00	2018-08-17 20:21:00	74.7218	-95.1344	-1.2	29.69	2.15	1436.22	0.2	1.05
2018-08-17	20:22:00	2018-08-17 20:22:00	74.7218	-95.1342	-1.21	29.68	2.13	1436.18	0.22	1.04
2018-08-17	20:23:00	2018-08-17 20:23:00	74.7218	-95.134	-1.21	29.68	2.12	1436.15	0.22	1.05
2018-08-17	20:24:00	2018-08-17 20:24:00	74.7218	-95.1338	-1.22	29.67	2.21	1436.11	0.21	1.05
2018-08-17	20:25:00	2018-08-17 20:25:00	74.7219	-95.1336	-1.22	29.67	2.16	1436.1	0.21	1.05
2018-08-17	20:26:00	2018-08-17 20:26:00	74.7219	-95.1334	-1.22	29.67	2.27	1436.09	0.2	1.03
2018-08-17	20:27:00	2018-08-17 20:27:00	74.7219	-95.1333	-1.22	29.66	2.19	1436.07	0.2	1.05
2018-08-17	20:28:00	2018-08-17 20:28:00	74.7219	-95.133	-1.22	29.64	2.09	1436.04	0.25	1.05
2018-08-17	20:29:00	2018-08-17 20:29:00	74.722	-95.1328	-1.22	29.63	2.03	1436.01	0.3	1.06
2018-08-17	20:30:00	2018-08-17 20:30:00	74.722	-95.1326	-1.23	29.61	1.96	1435.98	0.26	1.05
2018-08-17	20:31:00	2018-08-17 20:31:00	74.7221	-95.1324	-1.23	29.6	1.98	1435.96	0.21	1.06
2018-08-17	20:32:00	2018-08-17 20:32:00	74.7221	-95.1322	-1.24	29.59	2	1435.89	0.2	1.05
2018-08-17	20:33:00	2018-08-17 20:33:00	74.7221	-95.1321	-1.24	29.57	1.93	1435.88	0.2	1.05
2018-08-17	20:34:00	2018-08-17 20:34:00	74.7221	-95.132	-1.24	29.56	1.86	1435.86	0.18	1.06
2018-08-17	20:35:00	2018-08-17 20:35:00	74.7222	-95.1318	-1.24	29.55	1.84	1435.82	0.15	1.06
2018-08-17	20:36:00	2018-08-17 20:36:00	74.7222	-95.1317	-1.24	29.54	1.86	1435.82	0.13	1.06
2018-08-17	20:37:00	2018-08-17 20:37:00	74.7222	-95.1316	-1.25	29.53	1.78	1435.81	0.12	1.06
2018-08-17	20:38:00	2018-08-17 20:38:00	74.7223	-95.1315	-1.24	29.53	1.84	1435.82	0.13	1.06
2018-08-17	20:39:00	2018-08-17 20:39:00	74.7223	-95.1315	-1.24	29.53	1.83	1435.82	0.11	1.06
2018-08-17	20:40:00	2018-08-17 20:40:00	74.7223	-95.1314	-1.24	29.53	1.85	1435.8	0.1	1.06
2018-08-17	20:41:00	2018-08-17 20:41:00	74.7223	-95.1313	-1.24	29.53	1.89	1435.8	0.12	1.05
2018-08-17	20:42:00	2018-08-17 20:42:00	74.7223	-95.1312	-1.24	29.53	1.88	1435.82	0.13	1.05
2018-08-17	20:43:00	2018-08-17 20:43:00	74.7223	-95.1311	-1.24	29.53	1.96	1435.83	0.12	1.06
2018-08-17	20:44:00	2018-08-17 20:44:00	74.7223	-95.1309	-1.24	29.54	1.95	1435.83	0.13	1.05
2018-08-17	20:45:00	2018-08-17 20:45:00	74.7223	-95.1308	-1.23	29.54	1.95	1435.87	0.13	1.06
2018-08-17	20:46:00	2018-08-17 20:46:00	74.7223	-95.1307	-1.23	29.54	1.97	1435.88	0.15	1.06
2018-08-17	20:47:00	2018-08-17 20:47:00	74.7223	-95.1305	-1.23	29.55	2.07	1435.88	0.18	1.05
2018-08-17	20:48:00	2018-08-17 20:48:00	74.7224	-95.1304	-1.23	29.55	2	1435.91	0.13	1.05
2018-08-17	20:49:00	2018-08-17 20:49:00	74.7224	-95.1303	-1.22	29.55	2.02	1435.92	0.1	1.05
2018-08-17	20:50:00	2018-08-17 20:50:00	74.7224	-95.1302	-1.22	29.56	2.11	1435.95	0.12	1.05
2018-08-17	20:51:00	2018-08-17 20:51:00	74.7224	-95.13	-1.22	29.57	2.13	1435.96	0.12	1.05
2018-08-17	20:52:00	2018-08-17 20:52:00	74.7224	-95.1299	-1.22	29.57	2.15	1435.97	0.11	1.06
2018-08-17	20:53:00	2018-08-17 20:53:00	74.7224	-95.1298	-1.22	29.58	2.15	1435.98	0.13	1.06
2018-08-17	20:54:00	2018-08-17 20:54:00	74.7224	-95.1296	-1.22	29.58	2.12	1435.98	0.12	1.05
2018-08-17	20:55:00	2018-08-17 20:55:00	74.7224	-95.1295	-1.21	29.58	2.15	1436	0.12	1.05
2018-08-17	20:56:00	2018-08-17 20:56:00	74.7224	-95.1294	-1.21	29.59	2.11	1436.01	0.12	1.05
2018-08-17	20:57:00	2018-08-17 20:57:00	74.7224	-95.1293	-1.21	29.59	2.15	1436.03	0.14	1.05
2018-08-17	20:58:00	2018-08-17 20:58:00	74.7224	-95.1291	-1.21	29.6	2.16	1436.05	0.19	1.05
2018-08-17	20:59:00	2018-08-17 20:59:00	74.7224	-95.1289	-1.21	29.6	2.17	1436.06	0.2	1.05
2018-08-17	21:00:00	2018-08-17 21:00:00	74.7224	-95.1287	-1.21	29.6	2.22	1436.06	0.2	1.05
2018-08-17	21:01:00	2018-08-17 21:01:00	74.7224	-95.1286	-1.21	29.6	2.05	1436.06	0.2	1.05
2018-08-17	21:02:00	2018-08-17 21:02:00	74.7224	-95.1284	-1.21	29.59	2.13	1436.05	0.18	1.05
2018-08-17	21:03:00	2018-08-17 21:03:00	74.7224	-95.1283	-1.2	29.59	2.13	1436.07	0.17	1.05
2018-08-17	21:04:00	2018-08-17 21:04:00	74.7224	-95.1281	-1.2	29.59	2.05	1436.07	0.16	1.05
2018-08-17	21:05:00	2018-08-17 21:05:00	74.7224	-95.1279	-1.2	29.59	2.07	1436.08	0.13	1.05
2018-08-17	21:06:00	2018-08-17 21:06:00	74.7224	-95.1278	-1.2	29.59	2.09	1436.08	0.1	1.05
2018-08-17	21:07:00	2018-08-17 21:07:00	74.7224	-95.1277	-1.2	29.59	2.07	1436.09	0.12	1.05
2018-08-17	21:08:00	2018-08-17 21:08:00	74.7224	-95.1276	-1.2	29.59	2.03	1436.1	0.17	1.05
2018-08-17	21:09:00	2018-08-17 21:09:00	74.7224	-95.1275	-1.19	29.59	1.99	1436.12	0.15	1.05
2018-08-17	21:10:00	2018-08-17 21:10:00	74.7224	-95.1274	-1.19	29.59	2.03	1436.12	0.1	1.06
2018-08-17	21:11:00	2018-08-17 21:11:00	74.7224	-95.1273	-1.19	29.59	2.01	1436.1	0.1	1.06
2018-08-17	21:12:00	2018-08-17 21:12:00	74.7225	-95.1272	-1.2	29.58	2.05	1436.08	0.12	1.05
2018-08-17	21:13:00	2018-08-17 21:13:00	74.7225	-95.1271	-1.2	29.58	1.99	1436.08	0.12	1.06
2018-08-17	21:14:00	2018-08-17 21:14:00	74.7225	-95.1271	-1.2	29.57	1.95	1436.06	0.1	1.05
2018-08-17	21:15:00	2018-08-17 21:15:00	74.7226	-95.127	-1.21	29.57	1.96	1436.02	0.1	1.04
2018-08-17	21:16:00	2018-08-17 21:16:00	74.7226	-95.127	-1.2	29.57	1.91	1436.02	0.11	1.05
2018-08-17	21:17:00	2018-08-17 21:17:00	74.7226	-95.127	-1.2	29.57	1.86	1436.03	0.13	1.06
2018-08-17	21:18:00	2018-08-17 21:18:00	74.7227	-95.1269	-1.19	29.56	1.88	1436.07	0.13	1.06
2018-08-17	21:19:00	2018-08-17 21:19:00	74.7227	-95.1269	-1.19	29.56	1.83	1436.08	0.07	1.06
2018-08-17	21:20:00	2018-08-17 21:20:00	74.7227	-95.1269	-1.19	29.56	1.84	1436.08	1.1	1.05
2018-08-17	21:21:00	2018-08-17 21:21:00	74.723	-95.1292	-1.25	29.56	1.93	1436.01	3.89	1.04
2018-08-17	21:22:00	2018-08-17 21:22:00	74.7232	-95.1351	-1.34	29.49	1.64	1435.33	6.47	1.03
2018-08-17	21:23:00	2018-08-17 21:23:00	74.7231	-95.1429	-1.41	29.35	1.25	1434.84	7.38	1.03
2018-08-17	21:24:00	2018-08-17 21:24:00	74.7225	-95.1503	-1.43	29.28	1.39	1434.63	7.79	1.04
2018-08-17	21:25:00	2018-08-17 21:25:00	74.722	-95.1586	-1.44	29.38	1.37	1434.88	7.9	1.04
2018-08-17	21:26:00	2018-08-17 21:26:00	74.7214	-95.1664	-1.45	29.49	1.45	1434.87	7.63	1.03
2018-08-17	21:27:00	2018-08-17 21:27:00	74.7207	-95.1738	-1.46	29.52	1.44	1434.79	7.89	1.03
2018-08-17	21:28:00	2018-08-17 21:28:00	74.72	-95.182	-1.47	29.51	1.34	1434.73	8.13	1.02
2018-08-17	21:29:00	2018-08-17 21:29:00	74.7195	-95.1903	-1.48	29.4	1.39	1434.49	8.37	1.04
2018-08-17	21:30:00	2018-08-17 21:30:00	74.7189	-95.1992	-1.45	29.41	1.44	1434.76	9.22	1.05
2018-08-17	21:31:00	2018-08-17 21:31:00	74.7184	-95.2093	-1.45	29.52	1.27	1434.9	9.63	1.01
2018-08-17	21:32:00	2018-08-17 21:32:00	74.718	-95.219	-1.46	29.56	1.32	1434.9	9.28	1.03
2018-08-17	21:33:00	2018-08-17 21:33:00	74.7173	-95.2281	-1.46	29.5	1.32	1434.86	8.49	1.02
2018-08-17	21:34:00	2018-08-17 21:34:00	74.7167	-95.2362	-1.48	29.49	1.55	1434.74	8.29	1.03
2018-08-17	21:35:00	2018-08-17 21:35:00	74.7164	-95.2451	-1.48	29.52	1.53	1434.79	8.53	1.04
2018-08-17	21:36:00	2018-08-17 21:36:00	74.7156	-95.2536	-1.46	29.52	1.49	1434.77	8.77	1.02
2018-08-17	21:37:00	2018-08-17 21:37:00	74.7148	-95.2626	-1.44	29.59	1.59	1434.98	9.63	1.04
2018-08-17	21:38:00	2018-08-17 21:38:00	74.7143	-95.2731	-1.46	29.6	1.37	1434.97	9.48	1.03
2018-08-17	21:39:00	2018-08-17 21:39:00	74.7136	-95.2817	-1.44	29.49	1.51	1434.89	8.76	1.04
2018-08-17	21:40:00	2018-08-17 21:40:00	74.7126	-95.29	-1.47	29.44	1.59	1434.22	8.22	1.03
2018-08-17	21:41:00	2018-08-17 21:41:00	74.7126	-95.2979	-1.46	29.18	1.66	1434.57	8.16	1.03
2018-08-17	21:42:00	2018-08-17 21:42:00	74.7129	-95.3069	-1.42	29.49	1.58	1434.99	8.34	1.03
2018-08-17	21:43:00	2018-08-17 21:43:00	74.7132	-95.3152	-1.46	29.59	1.71	1434.93	8.4	1.03
2018-08-17	21:44:00	2018-08-17 21:44:00	74.7133	-95.3243	-1.47	29.09	1.67	1434.1	9.3	1.02
2018-08-17	21:45:00	2018-08-17 21:45:00	74.7132	-95.3347	-1.49	29.16	1.44	1434.28	10.05	1.04
2018-08-17	21:46:00	2018-08-17 21:46:00	74.7131	-95.3454	-1.46	29.15	1.34	1434.45	10.57	1.04
2018-08-17	21:47:00	2018-08-17 21:47:00	74.7126	-95.3568	-1.46	29.29	1.25	1434.66	10.98	1.04
2018-08-17	21:48:00	2018-08-17 21:48:00	74.712	-95.3681	-1.48	29.4	1.08	1434.47	9.42	1.02
2018-08-17	21:49:00	2018-08-17 21:49:00	74.7115	-95.3759	-1.42	28.69	1.99	1432.65	7.28	0.75
2018-08-17	21:50:00	2018-08-17 21:50:00	74.711	-95.3827	-1.45	27.78	1.74	1429.48	7.57	0.77
2018-08-17	21:51:00	2018-08-17 21:51:00	74.7105	-95.3913	-1.47	27.71	1.46	1429.78	7.79	0.78
2018-08-17	21:52:00	2018-08-17 21:52:00	74.71	-95.3986	-1.42	28.31	1.23	1434.41	8.33	0.81
2018-08-17	21:53:00	2018-08-17 21:53:00	74.7093	-95.4079	-1.31	29.24	1.23	1435.5	10.27	1.04
2018-08-17	21:54:00	2018-08-17 21:54:00	74.7074	-95.4172	-1.46	29.66	0.96	1435.22	10.93	1.04
2018-08-17	21:55:00	2018-08-17 21:55:00	74.7063	-95.4276	-1.48	29.6	0.95	1434.84	10.43	1.04
2018-08-17	21:56:00	2018-08-17 21:56:00	74.7056	-95.4379	-1.49	29.58	1.14	1434.36	9.7	1.04
2018-08-17	21:57:00	2018-08-17 21:57:00	74.7053	-95.4475	-1.45	29.23	1.19	1434.5	9.29	1.04
2018-08-17	21:58:00	2018-08-17 21:58:00	74.7052	-95.4573	-1.44	29.46	1.18	1435.04	9.65	1.04
2018-08-17	21:59:00	2018-08-17 21:59:00	74.7047	-95.4675	-1.44	29.5	1.18	1434.75	9.77	1.03
2018-08-17	22:00:00	2018-08-17 22:00:00	74.7034	-95.4764	-1.42	29.29	1.12	1434.79	9.44	1.04
2018-08-17	22:01:00	2018-08-17 22:01:00	74.7021	-95.4847	-1.43	29.4	1.14	1434.86	9.07	1.03
2018-08-17	22:02:00	2018-08-17 22:02:00	74.7007	-95.4923	-1.42	29.41	1.12	1434.84	9.11	1.04
2018-08-17	22:03:00	2018-08-17 22:03:00	74.6991	-95.5001	-1.41	29.33	1.02	1434.74	9.6	1.04
2018-08-17	22:04:00	2018-08-17 22:04:00	74.6978	-95.5091	-1.41	29.2	0.81	1434.34	9.83	1.04
2018-08-17	22:05:00	2018-08-17 22:05:00	74.6963	-95.5178	-1.38	28.89	0.65	1434.3	9.67	1.04
2018-08-17	22:06:00	2018-08-17 22:06:00	74.6949	-95.5262	-1.34	28.84	0.58	1434.38	9.53	1.01
2018-08-17	22:07:00	2018-08-17 22:07:00	74.6935	-95.5347	-1.35	28.78	NaN	1434.32	9.7	1.01
2018-08-17	22:08:00	2018-08-17 22:08:00	74.692	-95.5433	-1.23	28.77	NaN	1434.82	10.37	1.02
2018-08-17	22:09:00	2018-08-17 22:09:00	74.6899	-95.5515	-1.17	28.8	1.22	1435.18	11.02	1.02
2018-08-17	22:10:00	2018-08-17 22:10:00	74.6876	-95.5591	-1.2	28.87	0.56	1434.86	11.38	1
2018-08-17	22:11:00	2018-08-17 22:11:00	74.6861	-95.5696	-1.12	28.9	0.71	1435.58	11.75	1.02
2018-08-17	22:12:00	2018-08-17 22:12:00	74.6843	-95.5803	-1.1	28.94	0.63	1435.64	12.01	1.02
2018-08-17	22:13:00	2018-08-17 22:13:00	74.6832	-95.5921	-1.1	28.94	0.39	1435.7	12.08	1.02
2018-08-17	22:14:00	2018-08-17 22:14:00	74.6826	-95.6045	-1.1	28.95	0.49	1435.68	12.19	1.03
2018-08-17	22:15:00	2018-08-17 22:15:00	74.6826	-95.6173	-1.08	28.99	0.38	1435.8	12.23	1.02
2018-08-17	22:16:00	2018-08-17 22:16:00	74.6818	-95.6296	-1.1	29.02	0.33	1435.82	12.08	1.02
2018-08-17	22:17:00	2018-08-17 22:17:00	74.6815	-95.6421	-1.1	29	0.24	1435.82	11.92	1.03
2018-08-17	22:18:00	2018-08-17 22:18:00	74.6813	-95.6545	-1.09	29.07	0.21	1436.01	10.77	1.02
2018-08-17	22:19:00	2018-08-17 22:19:00	74.6813	-95.6647	-1.08	29.16	0.23	1436.16	9.03	1.02
2018-08-17	22:20:00	2018-08-17 22:20:00	74.6814	-95.6735	-1.14	29.18	0.26	1435.92	8.7	1.03
2018-08-17	22:21:00	2018-08-17 22:21:00	74.6814	-95.6829	-1.16	29.06	0.25	1435.6	9.05	0.99
2018-08-17	22:22:00	2018-08-17 22:22:00	74.6809	-95.6922	-1.1	29.15	0.55	1435.92	10.08	1.03
2018-08-17	22:23:00	2018-08-17 22:23:00	74.68	-95.7031	-1.06	29.21	0.32	1436.28	11.36	1.01
2018-08-17	22:24:00	2018-08-17 22:24:00	74.6788	-95.7146	-1.08	29.24	0.27	1436.22	11.84	1
2018-08-17	22:25:00	2018-08-17 22:25:00	74.677	-95.7251	-1.1	29.23	0.34	1436.12	11.69	1.01
2018-08-17	22:26:00	2018-08-17 22:26:00	74.6754	-95.7354	-1.13	29.24	0.29	1435.97	10.15	1.01
2018-08-17	22:27:00	2018-08-17 22:27:00	74.6742	-95.7435	-1.16	29.24	0.33	1435.94	8.68	1.01
2018-08-17	22:28:00	2018-08-17 22:28:00	74.6728	-95.7507	-1.18	29.32	0.28	1435.96	9.27	1.02
2018-08-17	22:29:00	2018-08-17 22:29:00	74.6716	-95.7601	-1.22	29.37	0.37	1435.76	9.89	0.97
2018-08-17	22:30:00	2018-08-17 22:30:00	74.6709	-95.7698	-1.41	28.9	0.82	1426.35	7.42	1
2018-08-17	22:31:00	2018-08-17 22:31:00	74.6705	-95.7751	-1.36	27.59	0.5	1428.81	4.9	0.83
2018-08-17	22:32:00	2018-08-17 22:32:00	74.6703	-95.7798	-1.3	26.26	0.42	1423	3.28	0.75
2018-08-17	22:33:00	2018-08-17 22:33:00	74.6702	-95.7822	-1.34	24.6	0.36	1430.99	1.43	0.58
2018-08-17	22:34:00	2018-08-17 22:34:00	74.6704	-95.782	-1.33	25.61	0.44	1432.59	1.32	0.73
2018-08-17	22:35:00	2018-08-17 22:35:00	74.6704	-95.7829	-1.37	27.34	0.67	1433.23	1.63	0.88
2018-08-17	22:36:00	2018-08-17 22:36:00	74.6703	-95.7844	-1.25	26.87	0.68	1428.35	1.05	0.86
2018-08-17	22:37:00	2018-08-17 22:37:00	74.6705	-95.7841	-1.19	24	0.51	1430.07	2.52	0.86
2018-08-17	22:38:00	2018-08-17 22:38:00	74.671	-95.7802	-1.21	26.72	0.94	1435.26	4.72	1.03
2018-08-17	22:39:00	2018-08-17 22:39:00	74.6714	-95.775	-1.32	29.15	1.56	1435.3	4.31	1.02
2018-08-17	22:40:00	2018-08-17 22:40:00	74.6715	-95.7714	-1.38	29.28	1.16	1434.88	2.23	1.03
2018-08-17	22:41:00	2018-08-17 22:41:00	74.6717	-95.7711	-1.34	29.21	0.89	1434.82	2.45	1.02
2018-08-17	22:42:00	2018-08-17 22:42:00	74.6711	-95.7741	-1.23	29.23	0.82	1435.52	6.32	1.01
2018-08-17	22:43:00	2018-08-17 22:43:00	74.6689	-95.7759	-1.42	29.32	0.88	1434.76	9.89	1.02
2018-08-17	22:44:00	2018-08-17 22:44:00	74.6662	-95.7807	-1.48	28.98	0.55	1433.78	10.06	0.81
2018-08-17	22:45:00	2018-08-17 22:45:00	74.6656	-95.7899	-1.22	28.11	0.47	1424.53	7.54	0.78
2018-08-17	22:46:00	2018-08-17 22:46:00	74.6654	-95.7962	-0.99	23.82	0.45	1416.93	6.39	0.56
2018-08-17	22:47:00	2018-08-17 22:47:00	74.6651	-95.8032	-1.01	20.13	0.47	1415.55	6.85	0.53
2018-08-17	22:48:00	2018-08-17 22:48:00	74.665	-95.8103	-0.96	18.89	0.47	1416.67	7.25	0.51
2018-08-17	22:49:00	2018-08-17 22:49:00	74.6648	-95.8182	-0.89	18.32	0.38	NaN	7.11	0.46
2018-08-17	22:50:00	2018-08-17 22:50:00	74.6646	-95.8252	-0.91	17.7	0.4	NaN	5.94	0.44
2018-08-17	22:51:00	2018-08-17 22:51:00	74.6646	-95.8306	NaN	16.65	0.43	1416.83	4.86	0.4
2018-08-17	22:52:00	2018-08-17 22:52:00	74.6645	-95.8354	NaN	17.55	0.45	1420.16	4.69	0.4
2018-08-17	22:53:00	2018-08-17 22:53:00	74.6643	-95.8404	-0.87	19.45	0.5	1415.78	4.79	0.41
2018-08-17	22:54:00	2018-08-17 22:54:00	74.664	-95.845	-1	19.29	0.42	1419.03	3.73	0.42
2018-08-17	22:55:00	2018-08-17 22:55:00	74.664	-95.8478	NaN	17.5	0.42	1415.95	3.51	0.4
2018-08-17	22:56:00	2018-08-17 22:56:00	74.6639	-95.8526	NaN	18.38	0.44	1416.96	4.56	0.41
2018-08-17	22:57:00	2018-08-17 22:57:00	74.6639	-95.8576	NaN	18.54	0.36	NaN	5.76	0.45
2018-08-17	22:58:00	2018-08-17 22:58:00	74.6637	-95.8647	-0.95	20.53	0.48	NaN	6.8	0.44
2018-08-17	22:59:00	2018-08-17 22:59:00	74.6631	-95.8716	-0.78	19.49	0.42	1413.02	6.94	0.4
2018-08-17	23:00:00	2018-08-17 23:00:00	74.6625	-95.8785	NaN	17.25	0.42	1421.04	6.58	0.42
2018-08-17	23:01:00	2018-08-17 23:01:00	74.6619	-95.8845	NaN	15.63	0.5	1422.96	7.42	0.42
2018-08-17	23:02:00	2018-08-17 23:02:00	74.6607	-95.8927	NaN	20.63	0.49	NaN	8.61	0.41
2018-08-17	23:03:00	2018-08-17 23:03:00	74.6597	-95.9008	-1.15	23.56	0.55	1419.99	8.84	0.41
2018-08-17	23:04:00	2018-08-17 23:04:00	74.6585	-95.9093	-1.04	22.73	0.4	NaN	8.74	0.43
2018-08-17	23:05:00	2018-08-17 23:05:00	74.6575	-95.917	-1.06	21.1	0.29	1417.05	8.4	0.42
2018-08-17	23:06:00	2018-08-17 23:06:00	74.6565	-95.925	NaN	19.56	0.34	1418.97	8.36	0.4
2018-08-17	23:07:00	2018-08-17 23:07:00	74.6555	-95.9326	-0.96	20.1	0.42	NaN	8.11	0.4
2018-08-17	23:08:00	2018-08-17 23:08:00	74.6545	-95.9403	-0.97	19.43	0.26	1416.04	7.75	0.39
2018-08-17	23:09:00	2018-08-17 23:09:00	74.6536	-95.9472	NaN	18.28	0.27	1418.3	5.74	0.39
2018-08-17	23:10:00	2018-08-17 23:10:00	74.6531	-95.9505	NaN	18.41	0.31	1421.95	2.86	0.38
2018-08-17	23:11:00	2018-08-17 23:11:00	74.653	-95.9522	NaN	19.89	0.38	1431.31	3.06	0.38
[truncated: 32,450 more rows]

## Sheet: lat_lon
Transect	Date (ddmmyyyy)	Time (hh:mm:ss)	LAT	LON	Microplastics Sampling System
1	2018-08-18	11:48:00	72.7501	-96.141	On
1	2018-08-18	22:15:00	71.4227	-97.8857	Off
2	2018-08-18	22:17:00	71.4155	-97.897	On
2	2018-08-19	13:17:00	69.1833	-100.676	Off
2	2018-08-19	17:58:00	69.042	-101.07	On
2	2018-08-19	19:45:00	68.717	-101.301	Off
3	2018-08-19	19:58:00	68.6714	-101.299	On
3	2018-08-20	03:00:00	68.6441	-98.4188	Off
4	2018-08-20	20:04:00	68.5537	-95.8583	On
4	2018-08-21	20:36:00	68.7905	-105.057	Off
5	2018-08-23	00:18:00	69.4349	-100.116	On
5	2018-08-23	14:20:00	71.5407	-97.5546	Off
6	2018-08-24	01:50:00	73.0064	-96.2385	On
6	2018-08-24	22:45:00	73.2438	-89.738	Off
7	2018-08-25	01:37:00	72.5569	-90.2676	On
7	2018-08-25	12:20:00	69.9661	-90.2328	Off
8	2018-08-27	03:36:00	74.5004	-80.548	On
8	2018-08-27	16:05:00	76.2128	-78.3426	Off
9	2018-08-27	17:55:00	76.4554	-78.7292	On
9	2018-08-28	00:01:00	76.3846	-77.3931	Off
9	2018-08-28	03:56:00	76.3996	-77.4126	On
9	2018-08-28	15:19:00	77.2067	-76.0491	Off
10	2018-08-28	15:34:00	77.1651	-76.0439	On
10	2018-08-29	05:00:00	76.3367	-71.2014	Off
11	2018-08-29	08:55:00	76.3294	-71.137	On
11	2018-08-29	17:48:00	74.9721	-69.7855	Off
12	2018-08-30	14:05:00	70.9354	-66.2968	On
12	2018-08-30	22:05:00	69.3431	-65.1427	Off
13	2018-08-31	00:06:00	69.0631	-64.9658	On
13	2018-08-31	12:30:00	67.5532	-64.0727	Off
14	2018-09-01	20:45:00	67.479	-63.507	On
14	2018-09-02	05:10:00	66.4982	-60.9059	Off
15	2018-09-02	17:45:00	66.5601	-61.666	On
15	2018-09-02	22:00:00	66.5283	-61.631	Off
16	2018-09-03	15:16:00	66.422	-61.2734	On
16	2018-09-03	20:05:00	65.4968	-61.7292	Off

## Sheet: air_contamination
Air Contamination Factor
Transect	Contamination Filters	Air Contamination Factor
1	A, D	1.143
2	B, D	0.779
3	D	0.143
4	E, B, D	1.112
5	D	0.143
6	E, B, D	1.112
7	B, F	1.636
8	B, F	1.636
9	B, C	2.136
10	B, C	2.136
11	B, C	2.136
12	B, C, E	2.469
13	B, C	2.136
14	B, C	2.136
15	A, C	2.5
16	C, D	1.643
